# Supplementary material for: Antiviral Activity of Anthranilamide Peptidomimetics against Herpes Simplex Virus 1 and a Coronavirus
Source: MDPI journal article supplement (doi:10.3390/antibiotics12091436), 2023-09-12

## The Supplementary Data for-

# Antiviral Activity of Anthranilamide Peptidomimetics against herpes simplex virus 1 and a coronavirus

Umme Laila Urmi<sup>1\*</sup>, Samuel Attard<sup>2</sup>, Ajay Kumar Vijay<sup>1</sup>, Mark D. P. Willcox<sup>1\*</sup>, Naresh Kumar<sup>2</sup>, Salekul Islam<sup>1,3</sup>, Rajesh Kuppusamy<sup>1,2</sup>

<sup>1</sup>School of Optometry and Vision Science, University of New South Wales, Sydney, NSW 2052, Australia

<sup>2</sup>School of Chemistry, University of New South Wales, Sydney, NSW 2052, Australia

<sup>3</sup>Department of Microbiology, Jahangirnagar University, Savar, Dhaka-1342, Bangladesh

---

## Contents

|                                                                                                                                                                               |    |
|-------------------------------------------------------------------------------------------------------------------------------------------------------------------------------|----|
| <sup>1</sup> H NMR spectra of (S)-N-(2-((1-((2-aminoethyl)amino)-3-(1 <i>H</i> -indol-3-yl)-1-oxopropan-2-yl)carbamoyl)phenyl)-2-naphthamide ( <b>1</b> ) .....               | 3  |
| <sup>13</sup> C NMR spectra of (S)-N-(2-((1-((2-aminoethyl)amino)-3-(1 <i>H</i> -indol-3-yl)-1-oxopropan-2-yl)carbamoyl)phenyl)-2-naphthamide ( <b>1</b> ).....               | 4  |
| <sup>1</sup> H NMR spectra of (S)-N-(2-((1-((2-aminoethyl)amino)-3-(1 <i>H</i> -indol-3-yl)-1-oxopropan-2-yl)carbamoyl)-4-fluorophenyl)-2-naphthamide ( <b>2</b> ) .....      | 5  |
| <sup>13</sup> C NMR spectra of (S)-N-(2-((1-((2-aminoethyl)amino)-3-(1 <i>H</i> -indol-3-yl)-1-oxopropan-2-yl)carbamoyl)-4-fluorophenyl)-2-naphthamide ( <b>2</b> ) .....     | 7  |
| <sup>1</sup> H NMR spectra of (S)-N-(2-((1-((2-aminoethyl)amino)-3-(1 <i>H</i> -indol-3-yl)-1-oxopropan-2-yl)carbamoyl)-4-chlorophenyl)-2-naphthamide ( <b>3</b> ).....       | 8  |
| <sup>13</sup> C NMR spectra of (S)-N-(2-((1-((2-aminoethyl)amino)-3-(1 <i>H</i> -indol-3-yl)-1-oxopropan-2-yl)carbamoyl)-4-chlorophenyl)-2-naphthamide ( <b>3</b> ).....      | 9  |
| <sup>1</sup> H NMR spectra of (S)-N-(2-((1-((2-aminoethyl)amino)-3-(1 <i>H</i> -indol-3-yl)-1-oxopropan-2-yl)carbamoyl)-4-bromophenyl)-2-naphthamide ( <b>4</b> ) .....       | 10 |
| <sup>13</sup> C NMR spectra of (S)-N-(2-((1-((2-aminoethyl)amino)-3-(1 <i>H</i> -indol-3-yl)-1-oxopropan-2-yl)carbamoyl)-4-bromophenyl)-2-naphthamide ( <b>4</b> ) .....      | 11 |
| <sup>1</sup> H NMR spectra of (S)-N-(2-((1-((2-aminoethyl)amino)-3-(1 <i>H</i> -indol-3-yl)-1-oxopropan-2-yl)carbamoyl)-4-methoxyphenyl)-2-naphthamide ( <b>5</b> ).....      | 12 |
| <sup>13</sup> C NMR spectra of (S)-N-(2-((1-((2-aminoethyl)amino)-3-(1 <i>H</i> -indol-3-yl)-1-oxopropan-2-yl)carbamoyl)-4-methoxyphenyl)-2-naphthamide ( <b>5</b> ) .....    | 13 |
| <sup>1</sup> H NMR spectra of (S)-N-(2-((1-((2-guanidinoethyl)amino)-3-(1 <i>H</i> -indol-3-yl)-1-oxopropan-2-yl)carbamoyl)phenyl)-2-naphthamide ( <b>6</b> ).....            | 14 |
| <sup>13</sup> C NMR spectra of (S)-N-(2-((1-((2-guanidinoethyl)amino)-3-(1 <i>H</i> -indol-3-yl)-1-oxopropan-2-yl)carbamoyl)phenyl)-2-naphthamide ( <b>6</b> ).....           | 15 |
| <sup>1</sup> H NMR spectra of (S)-N-(4-fluoro-2-((1-((2-guanidinoethyl)amino)-3-(1 <i>H</i> -indol-3-yl)-1-oxopropan-2-yl)carbamoyl)phenyl)-2-naphthamide ( <b>7</b> ) .....  | 16 |
| <sup>13</sup> C NMR spectra of (S)-N-(4-fluoro-2-((1-((2-guanidinoethyl)amino)-3-(1 <i>H</i> -indol-3-yl)-1-oxopropan-2-yl)carbamoyl)phenyl)-2-naphthamide ( <b>7</b> ) ..... | 17 |
| <sup>1</sup> H NMR spectra of (S)-N-(4-chloro-2-((1-((2-guanidinoethyl)amino)-3-(1 <i>H</i> -indol-3-yl)-1-oxopropan-2-yl)carbamoyl)phenyl)-2-naphthamide ( <b>8</b> ).....   | 18 |
| <sup>13</sup> C NMR spectra of (S)-N-(4-chloro-2-((1-((2-guanidinoethyl)amino)-3-(1 <i>H</i> -indol-3-yl)-1-oxopropan-2-yl)carbamoyl)phenyl)-2-naphthamide ( <b>8</b> ) ..... | 19 |

|                                                                                                                                                                                                     |    |
|-----------------------------------------------------------------------------------------------------------------------------------------------------------------------------------------------------|----|
| <sup>1</sup> H NMR spectra of (S)-N-(4-bromo-2-((1-((2-guanidinoethyl)amino)-3-(1 <i>H</i> -indol-3-yl)-1-oxopropan-2-yl)carbamoyl)phenyl)-2-naphthamide ( <b>9</b> ) .....                         | 20 |
| <sup>13</sup> C NMR spectra of (S)-N-(4-bromo-2-((1-((2-guanidinoethyl)amino)-3-(1 <i>H</i> -indol-3-yl)-1-oxopropan-2-yl)carbamoyl)phenyl)-2-naphthamide ( <b>9</b> ) .....                        | 21 |
| <sup>1</sup> H NMR spectra of (S)-N-(2-((1-((2-guanidinoethyl)amino)-3-(1 <i>H</i> -indol-3-yl)-1-oxopropan-2-yl)carbamoyl)-4-methoxyphenyl)-2-naphthamide ( <b>10</b> ) .....                      | 22 |
| <sup>13</sup> C NMR spectra of (S)-N-(2-((1-((2-guanidinoethyl)amino)-3-(1 <i>H</i> -indol-3-yl)-1-oxopropan-2-yl)carbamoyl)-4-methoxyphenyl)-2-naphthamide ( <b>10</b> ) .....                     | 23 |
| <sup>1</sup> H NMR of (S)-2-amino-N-(1-((2-aminoethyl)amino)-3-(1 <i>H</i> -indol-3-yl)-1-oxopropan-2-yl)-5-(naphthalen-2-yl)benzamide ( <b>11</b> ) .....                                          | 24 |
| <sup>13</sup> C NMR of (S)-2-amino-N-(1-((2-aminoethyl)amino)-3-(1 <i>H</i> -indol-3-yl)-1-oxopropan-2-yl)-5-(naphthalen-2-yl)benzamide ( <b>11</b> ).....                                          | 24 |
| <sup>1</sup> H NMR of (S)-4-amino-N-(1-((2-aminoethyl)amino)-3-(1 <i>H</i> -indol-3-yl)-1-oxopropan-2-yl)-[1,1':4',1''-terphenyl]-3-carboxamide ( <b>12</b> ) .....                                 | 25 |
| <sup>13</sup> C NMR of (S)-4-amino-N-(1-((2-aminoethyl)amino)-3-(1 <i>H</i> -indol-3-yl)-1-oxopropan-2-yl)-[1,1':4',1''-terphenyl]-3-carboxamide ( <b>12</b> ) .....                                | 27 |
| <sup>1</sup> H NMR spectra of (S)-2-amino-N-(1-((2-aminoethyl)amino)-3-(1 <i>H</i> -indol-3-yl)-1-oxopropan-2-yl)-5-(2,4-dimethoxypyrimidin-5-yl)benzamide ( <b>13</b> ).....                       | 26 |
| <sup>13</sup> C NMR spectra of (S)-2-amino-N-(1-((2-aminoethyl)amino)-3-(1 <i>H</i> -indol-3-yl)-1-oxopropan-2-yl)-5-(2,4-dimethoxypyrimidin-5-yl)benzamide ( <b>13</b> ).....                      | 27 |
| <sup>1</sup> H NMR spectra of (S)-4-amino-N-(1-((2-aminoethyl)amino)-3-(1 <i>H</i> -indol-3-yl)-1-oxopropan-2-yl)-[1,1':2',1''-terphenyl]-3-carboxamide ( <b>14</b> ).....                          | 28 |
| <sup>13</sup> C NMR spectra of (S)-4-amino-N-(1-((2-aminoethyl)amino)-3-(1 <i>H</i> -indol-3-yl)-1-oxopropan-2-yl)-[1,1':2',1''-terphenyl]-3-carboxamide ( <b>14</b> ).....                         | 29 |
| <sup>1</sup> H NMR of N-(4-bromo-2-(((S)-1-((2-((S)-2,6-diaminohexanamido)ethyl)amino)-3-(1 <i>H</i> -indol-3-yl)-1-oxopropan-2-yl)carbamoyl)phenyl)-2-naphthamide ( <b>15</b> ).....               | 30 |
| <sup>13</sup> C NMR of N-(4-bromo-2-(((S)-1-((2-((S)-2,6-diaminohexanamido)ethyl)amino)-3-(1 <i>H</i> -indol-3-yl)-1-oxopropan-2-yl)carbamoyl)phenyl)-2-naphthamide ( <b>15</b> ).....              | 31 |
| <sup>1</sup> H NMR of N-(4-bromo-2-(((S)-1-((2-((S)-2,6-diaminohexanamido)ethyl)amino)-3-(1 <i>H</i> -indol-3-yl)-1-oxopropan-2-yl)carbamoyl)phenyl)-[1,1'-biphenyl]-3-carboxamide ( <b>16</b> )..  | 32 |
| <sup>13</sup> C NMR of N-(4-bromo-2-(((S)-1-((2-((S)-2,6-diaminohexanamido)ethyl)amino)-3-(1 <i>H</i> -indol-3-yl)-1-oxopropan-2-yl)carbamoyl)phenyl)-[1,1'-biphenyl]-3-carboxamide ( <b>16</b> ).. | 33 |
| <sup>1</sup> H NMR of N-(4-bromo-2-(((S)-1-((2-((S)-2,6-diaminohexanamido)ethyl)amino)-3-(1 <i>H</i> -indol-3-yl)-1-oxopropan-2-yl)carbamoyl)phenyl)-[1,1'-biphenyl]-4-carboxamide ( <b>17</b> )..  | 34 |
| <sup>13</sup> C NMR of N-(4-bromo-2-(((S)-1-((2-((S)-2,6-diaminohexanamido)ethyl)amino)-3-(1 <i>H</i> -indol-3-yl)-1-oxopropan-2-yl)carbamoyl)phenyl)-[1,1'-biphenyl]-4-carboxamide ( <b>17</b> ).. | 35 |

<sup>1</sup>H NMR spectra of (*S*)-*N*-(2-((1-((2-aminoethyl)amino)-3-(1*H*-indol-3-yl)-1-oxopropan-2-yl)carbamoyl)phenyl)-2-naphthamide (**1**)

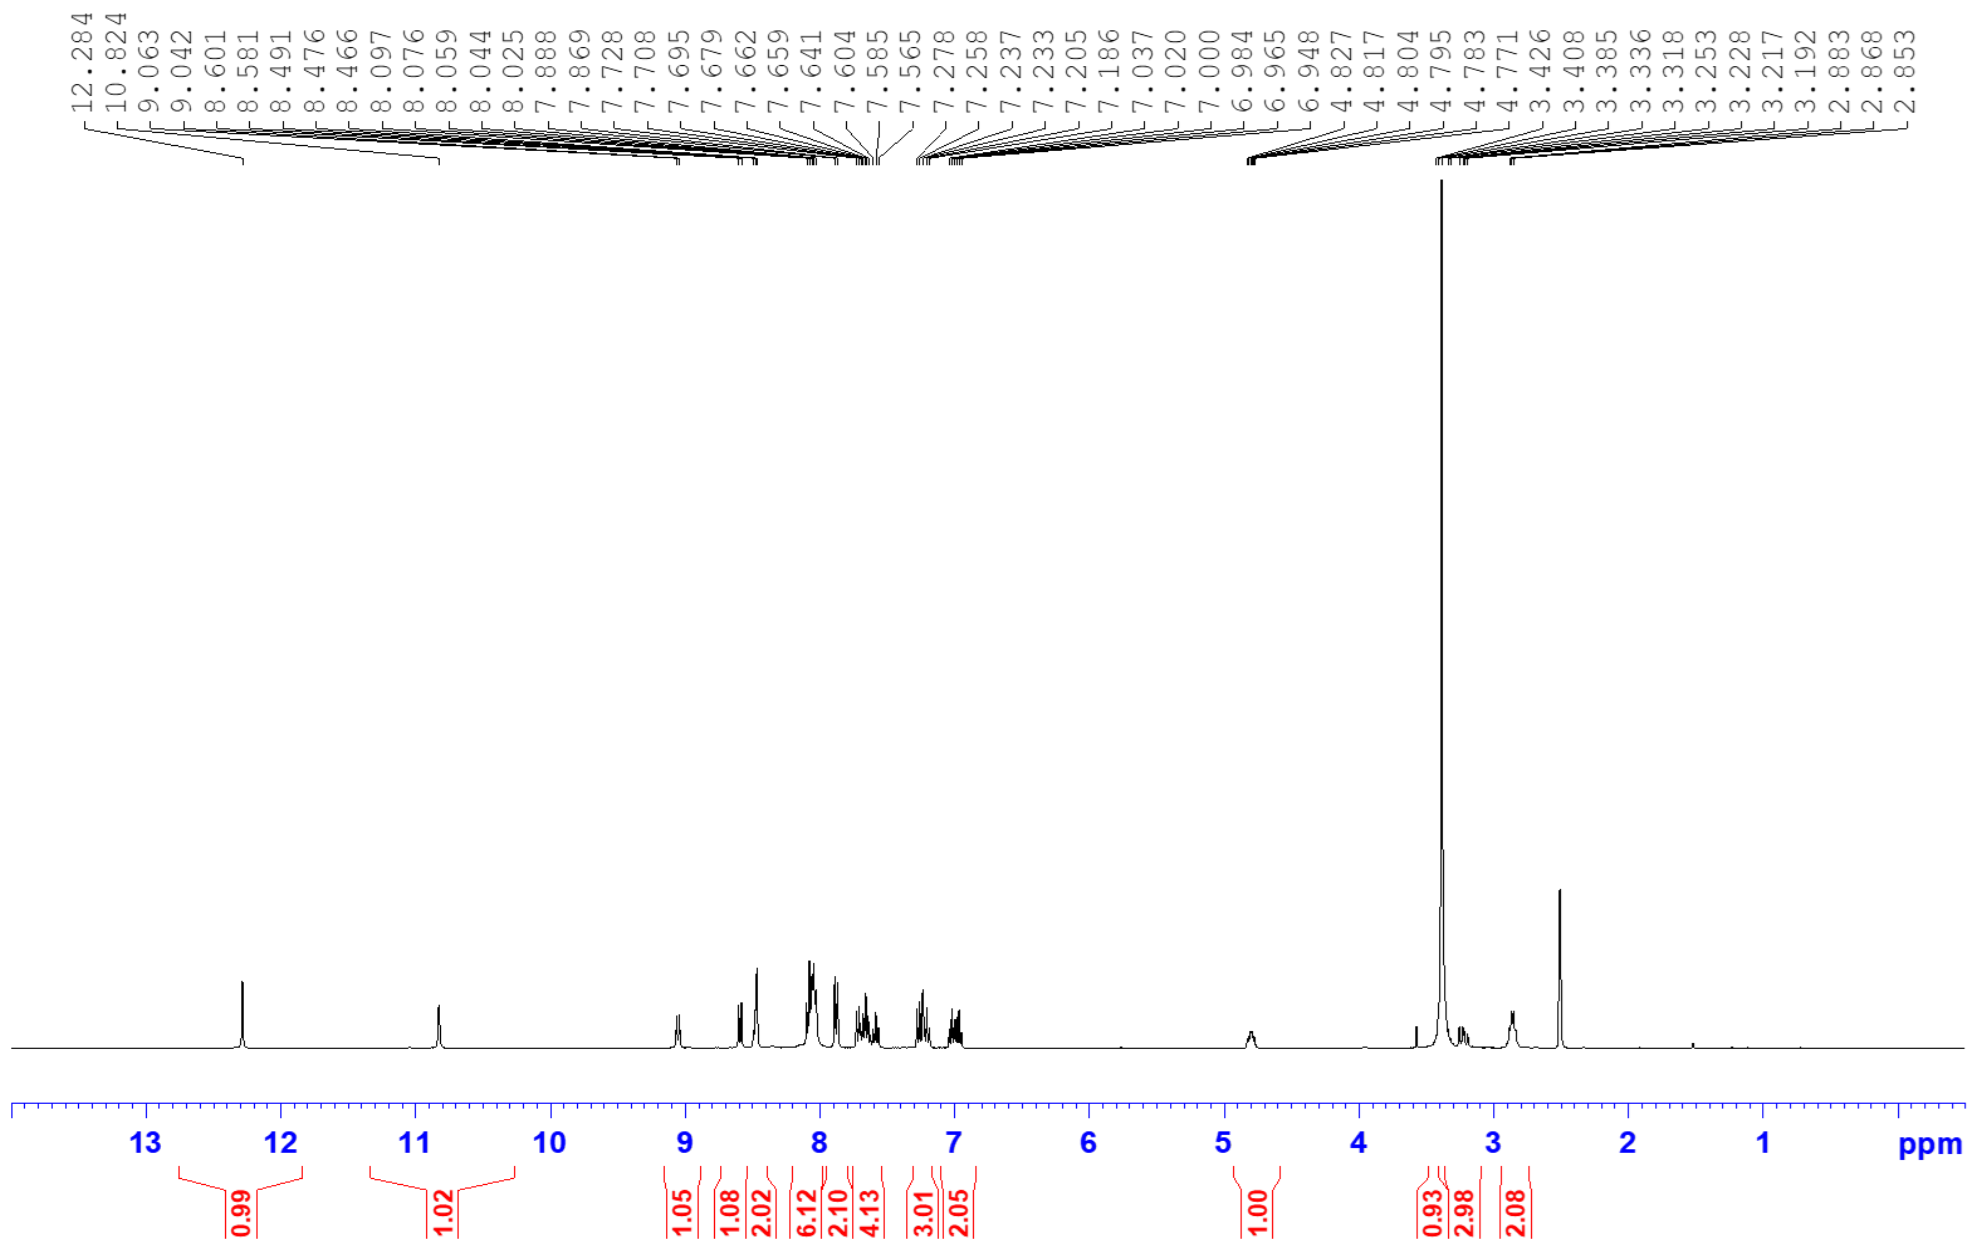

<sup>13</sup>C NMR spectra of (*S*)-*N*-(2-((1-((2-aminoethyl)amino)-3-(1*H*-indol-3-yl)-1-oxopropan-2-yl)carbamoyl)phenyl)-2-naphthamide (**1**)

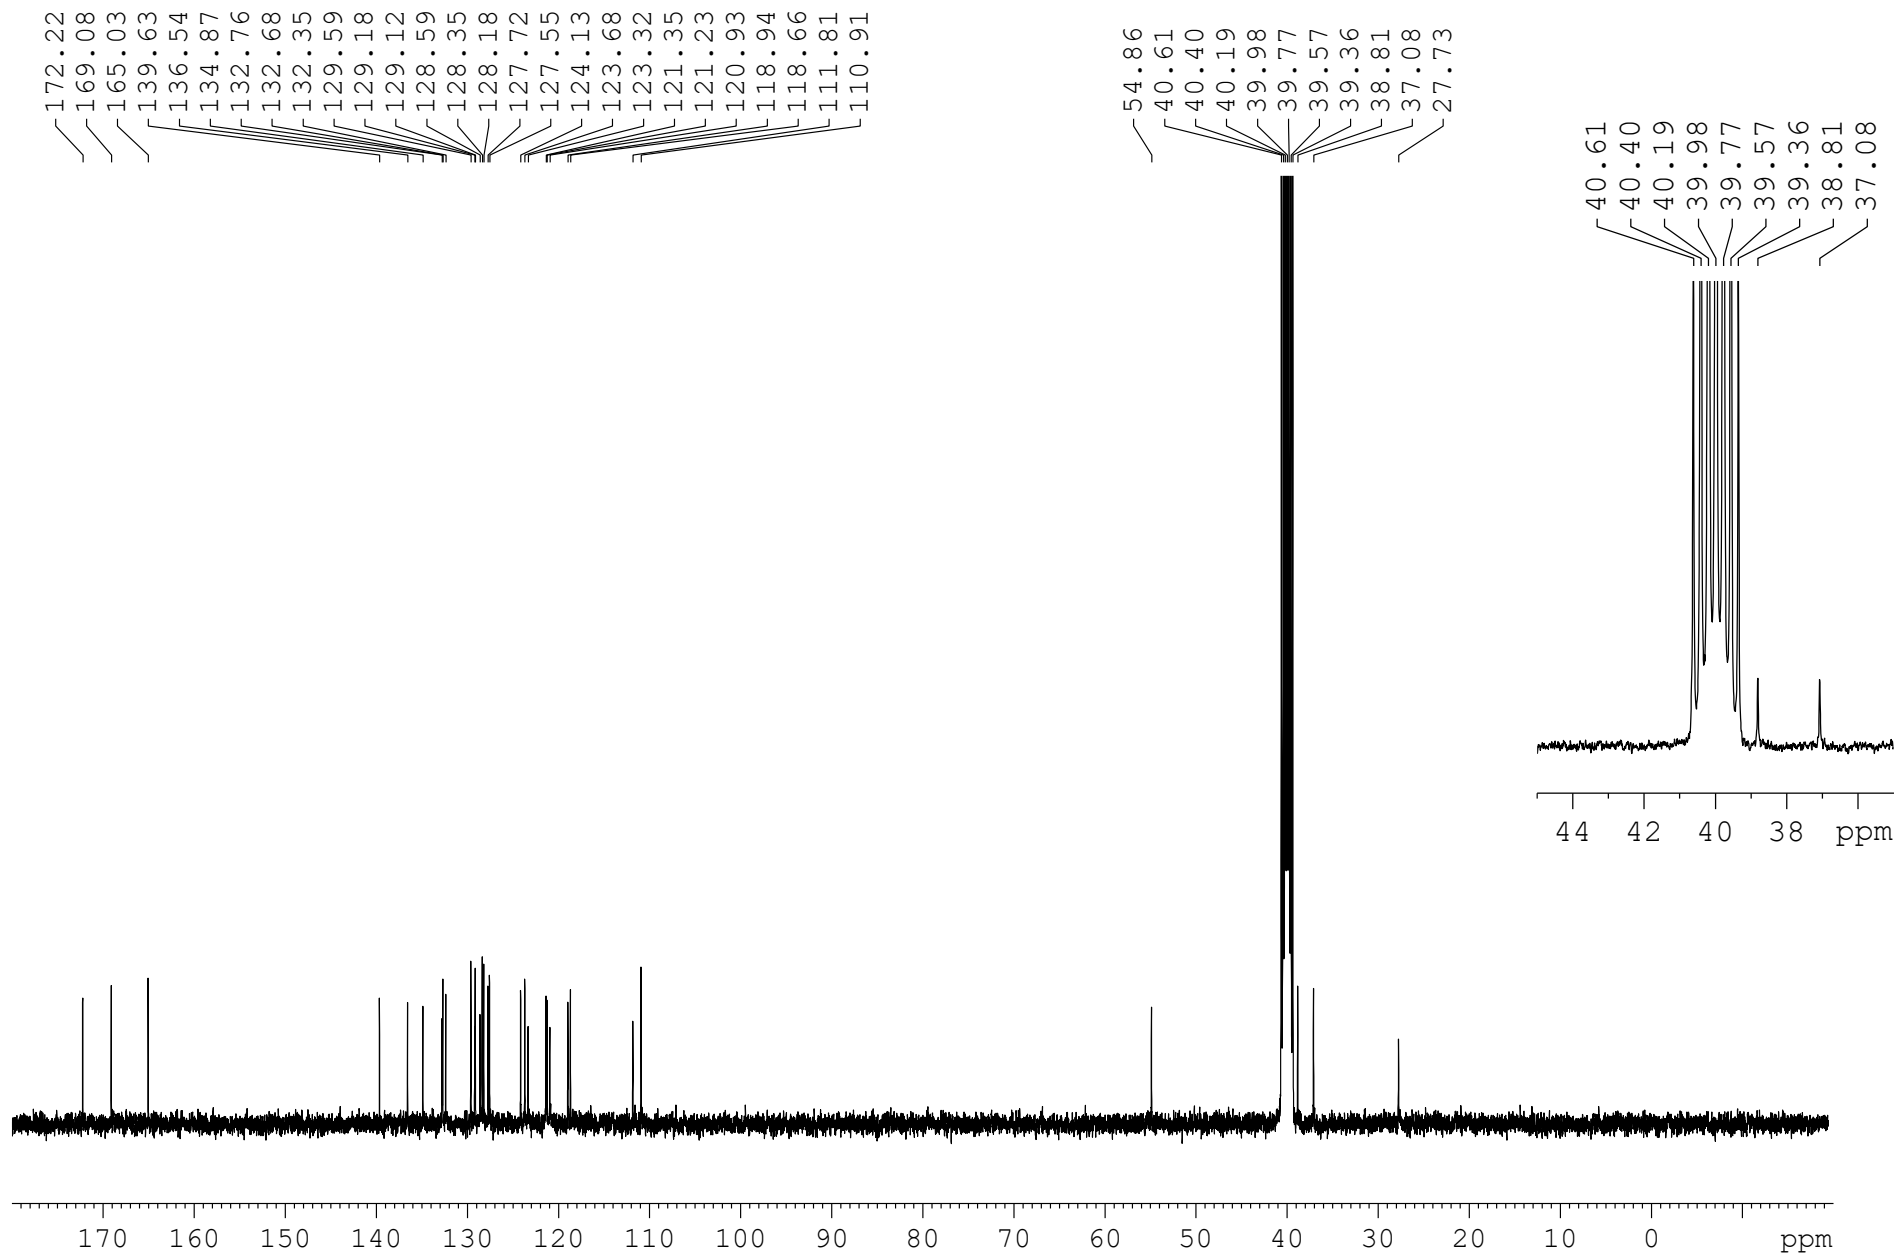

$^1\text{H}$  NMR spectra of (*S*)-*N*-(2-((1-((2-aminoethyl)amino)-3-(1*H*-indol-3-yl)-1-oxopropan-2-yl)carbonyl)-4-fluorophenyl)-2-naphthamide (**2**)

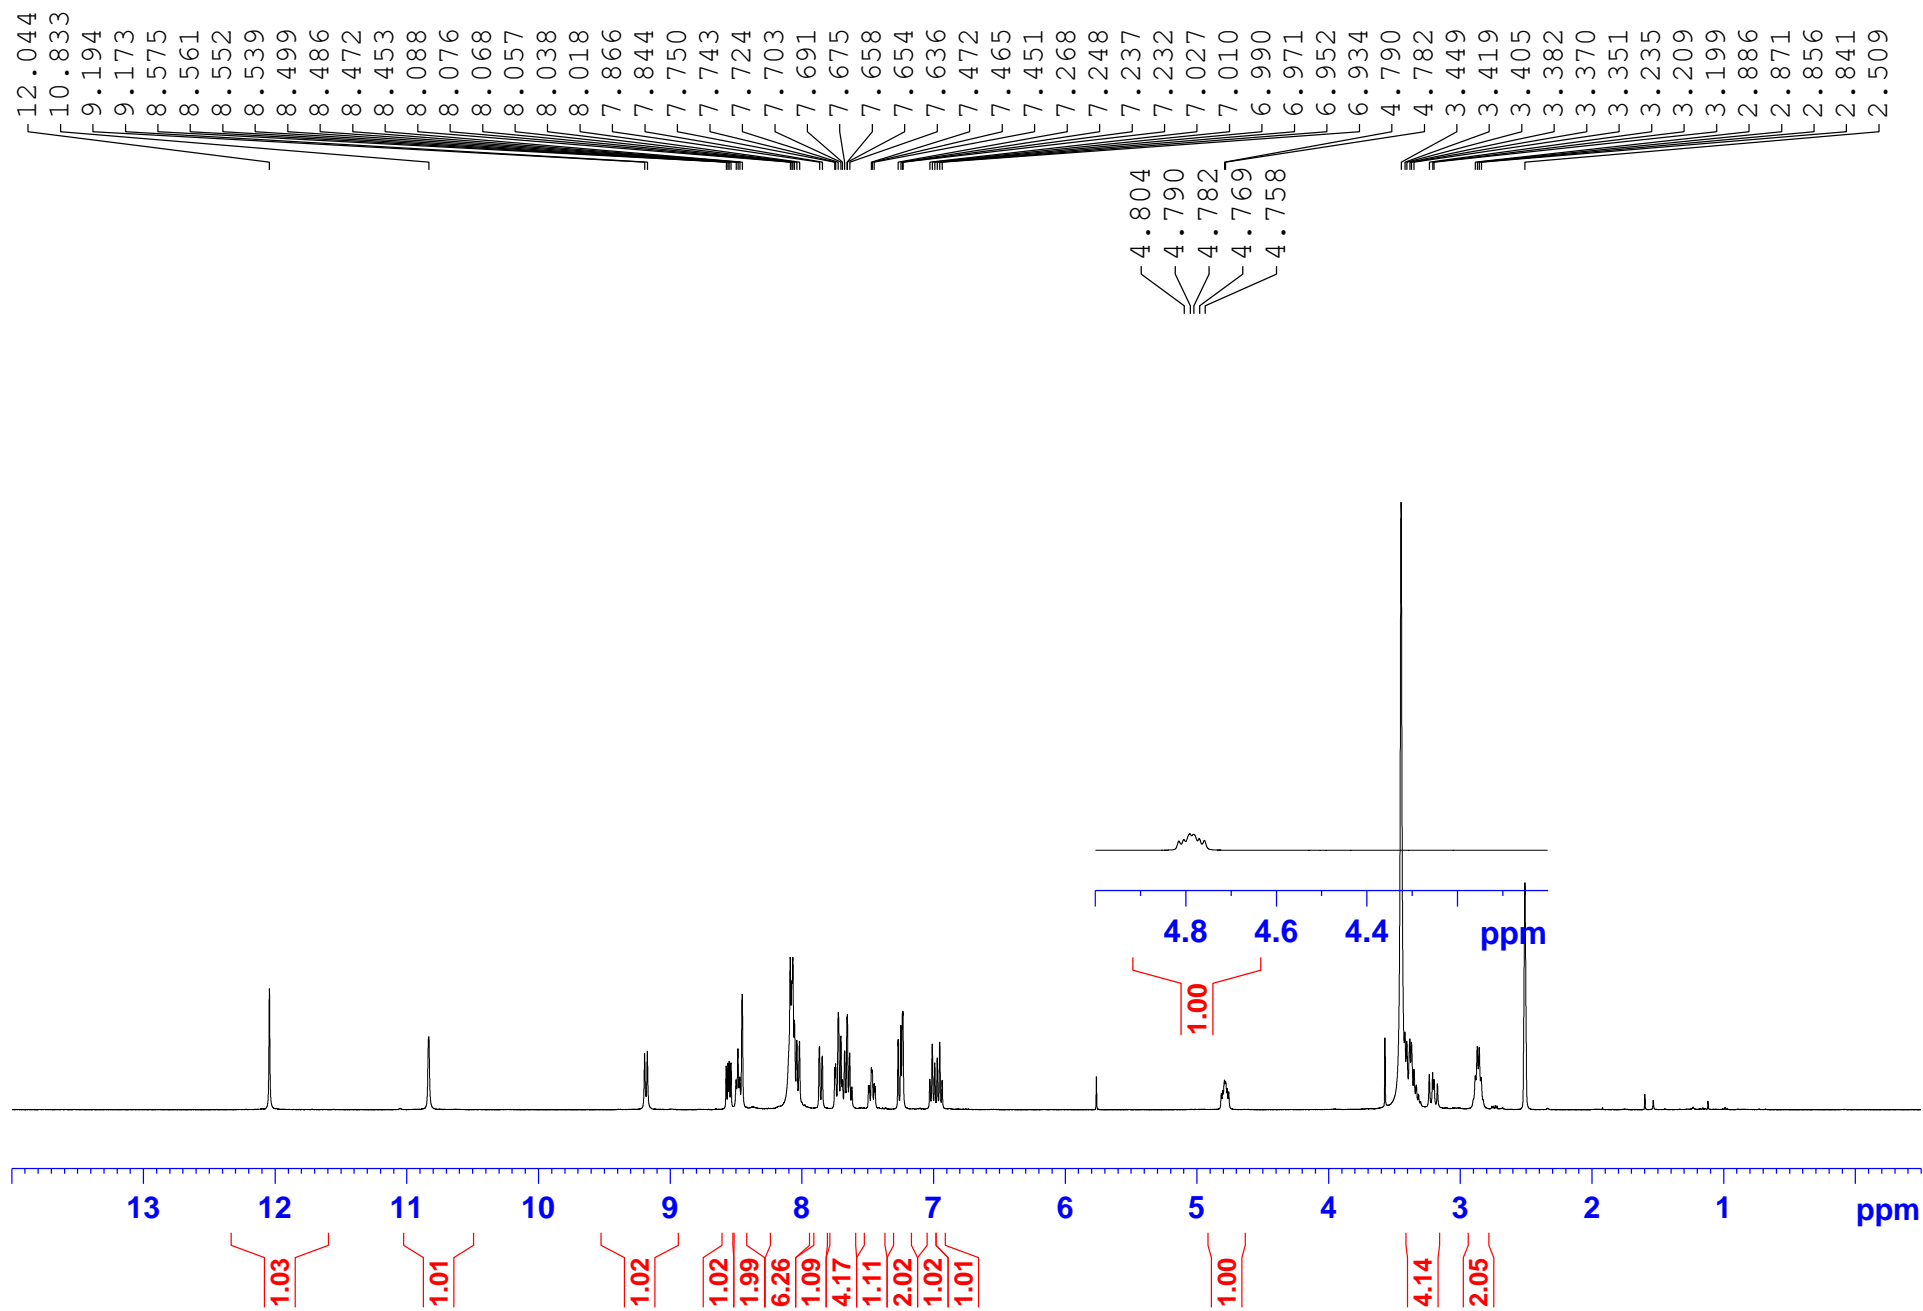

$^{13}\text{C}$  NMR spectra of (*S*)-*N*-(2-((1-((2-aminoethyl)amino)-3-(*1H*-indol-3-yl)-1-oxopropan-2-yl)carbamoyl)-4-fluorophenyl)-2-naphthamide (**2**)

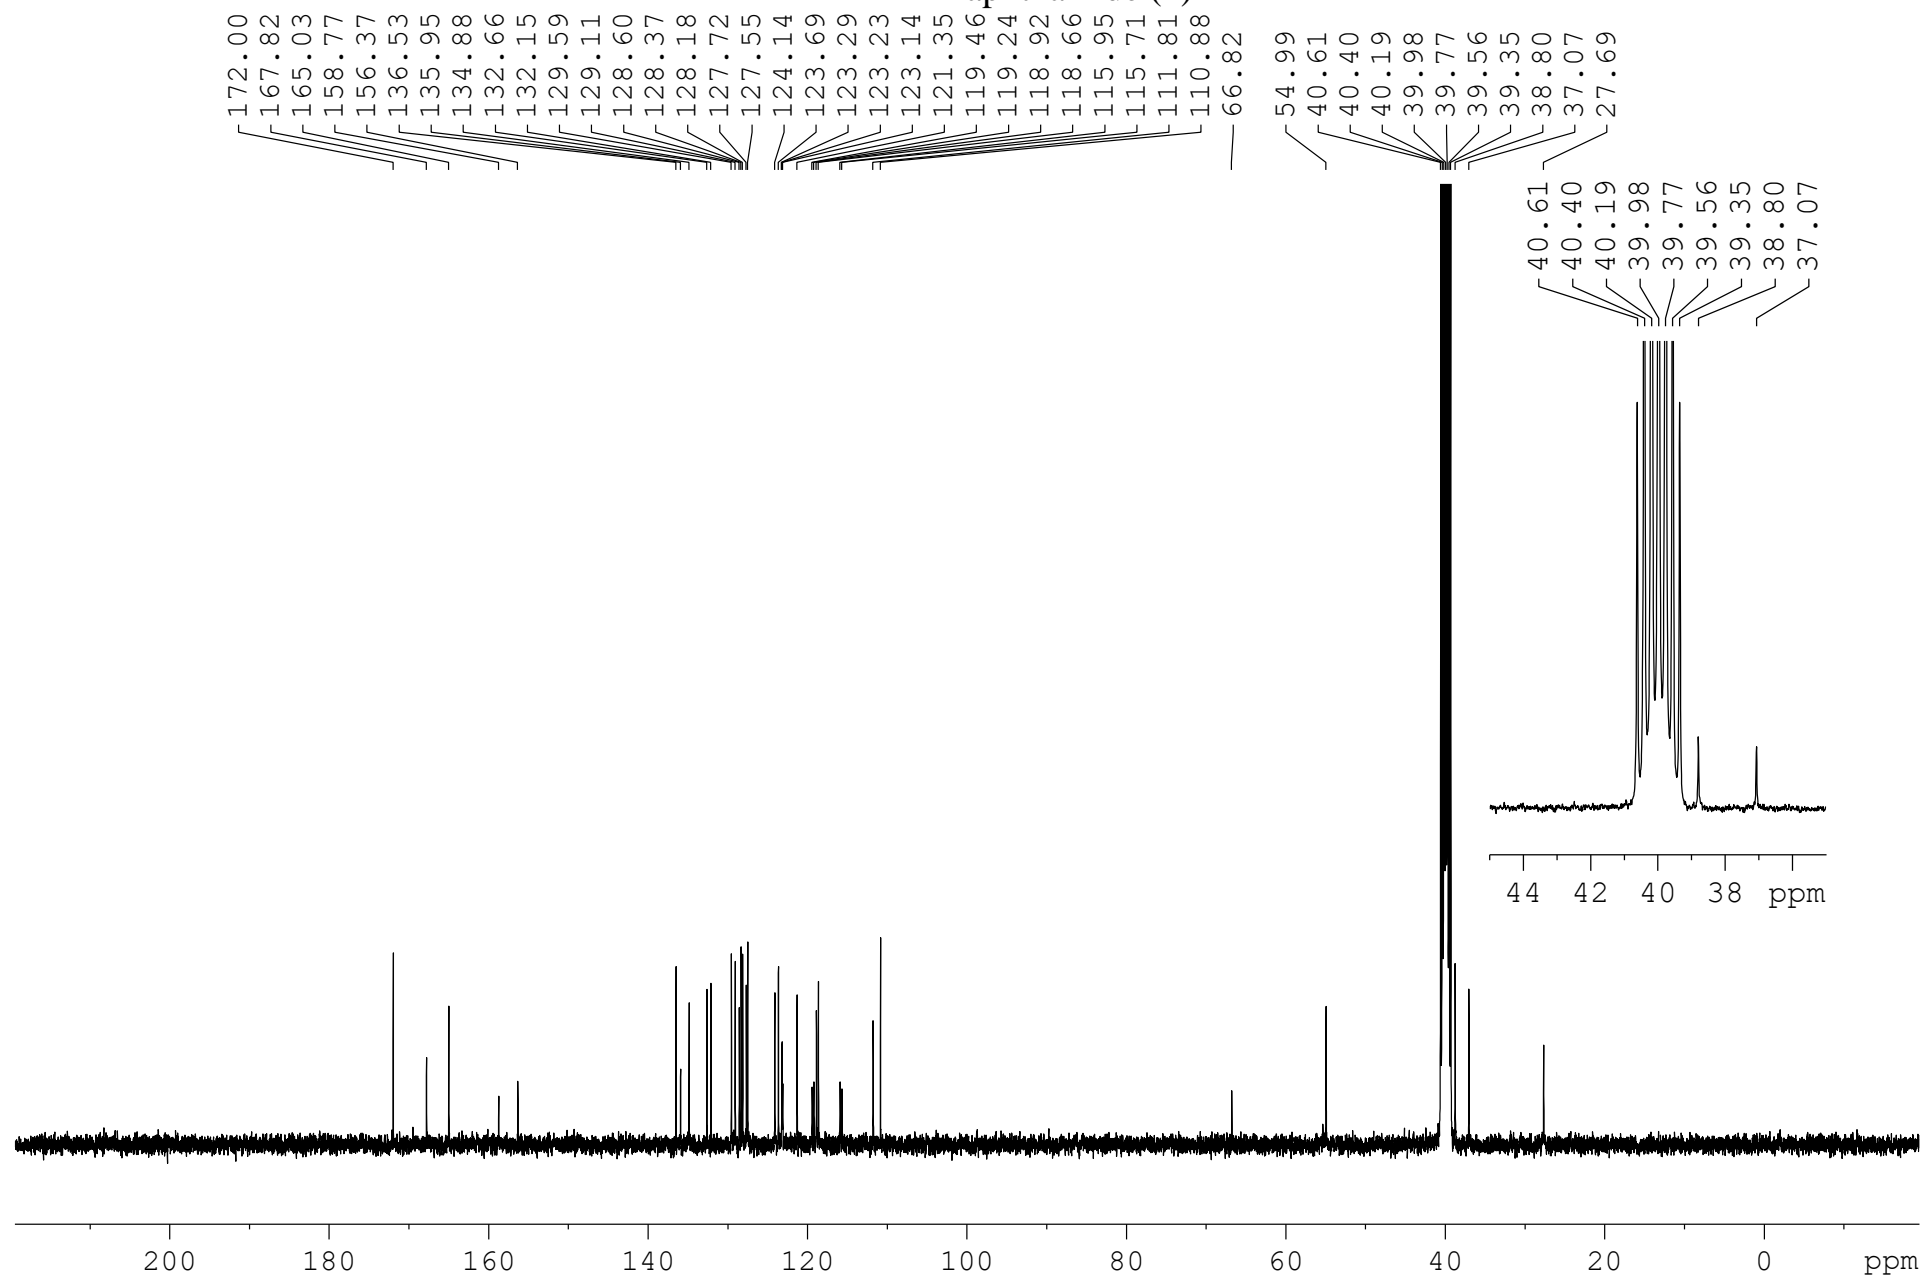

<sup>1</sup>H NMR spectra of (*S*)-*N*-(2-((1-((2-aminoethyl)amino)-3-(1*H*-indol-3-yl)-1-oxopropan-2-yl)carbamoyl)-4-chlorophenyl)-2-naphthamide (**3**)

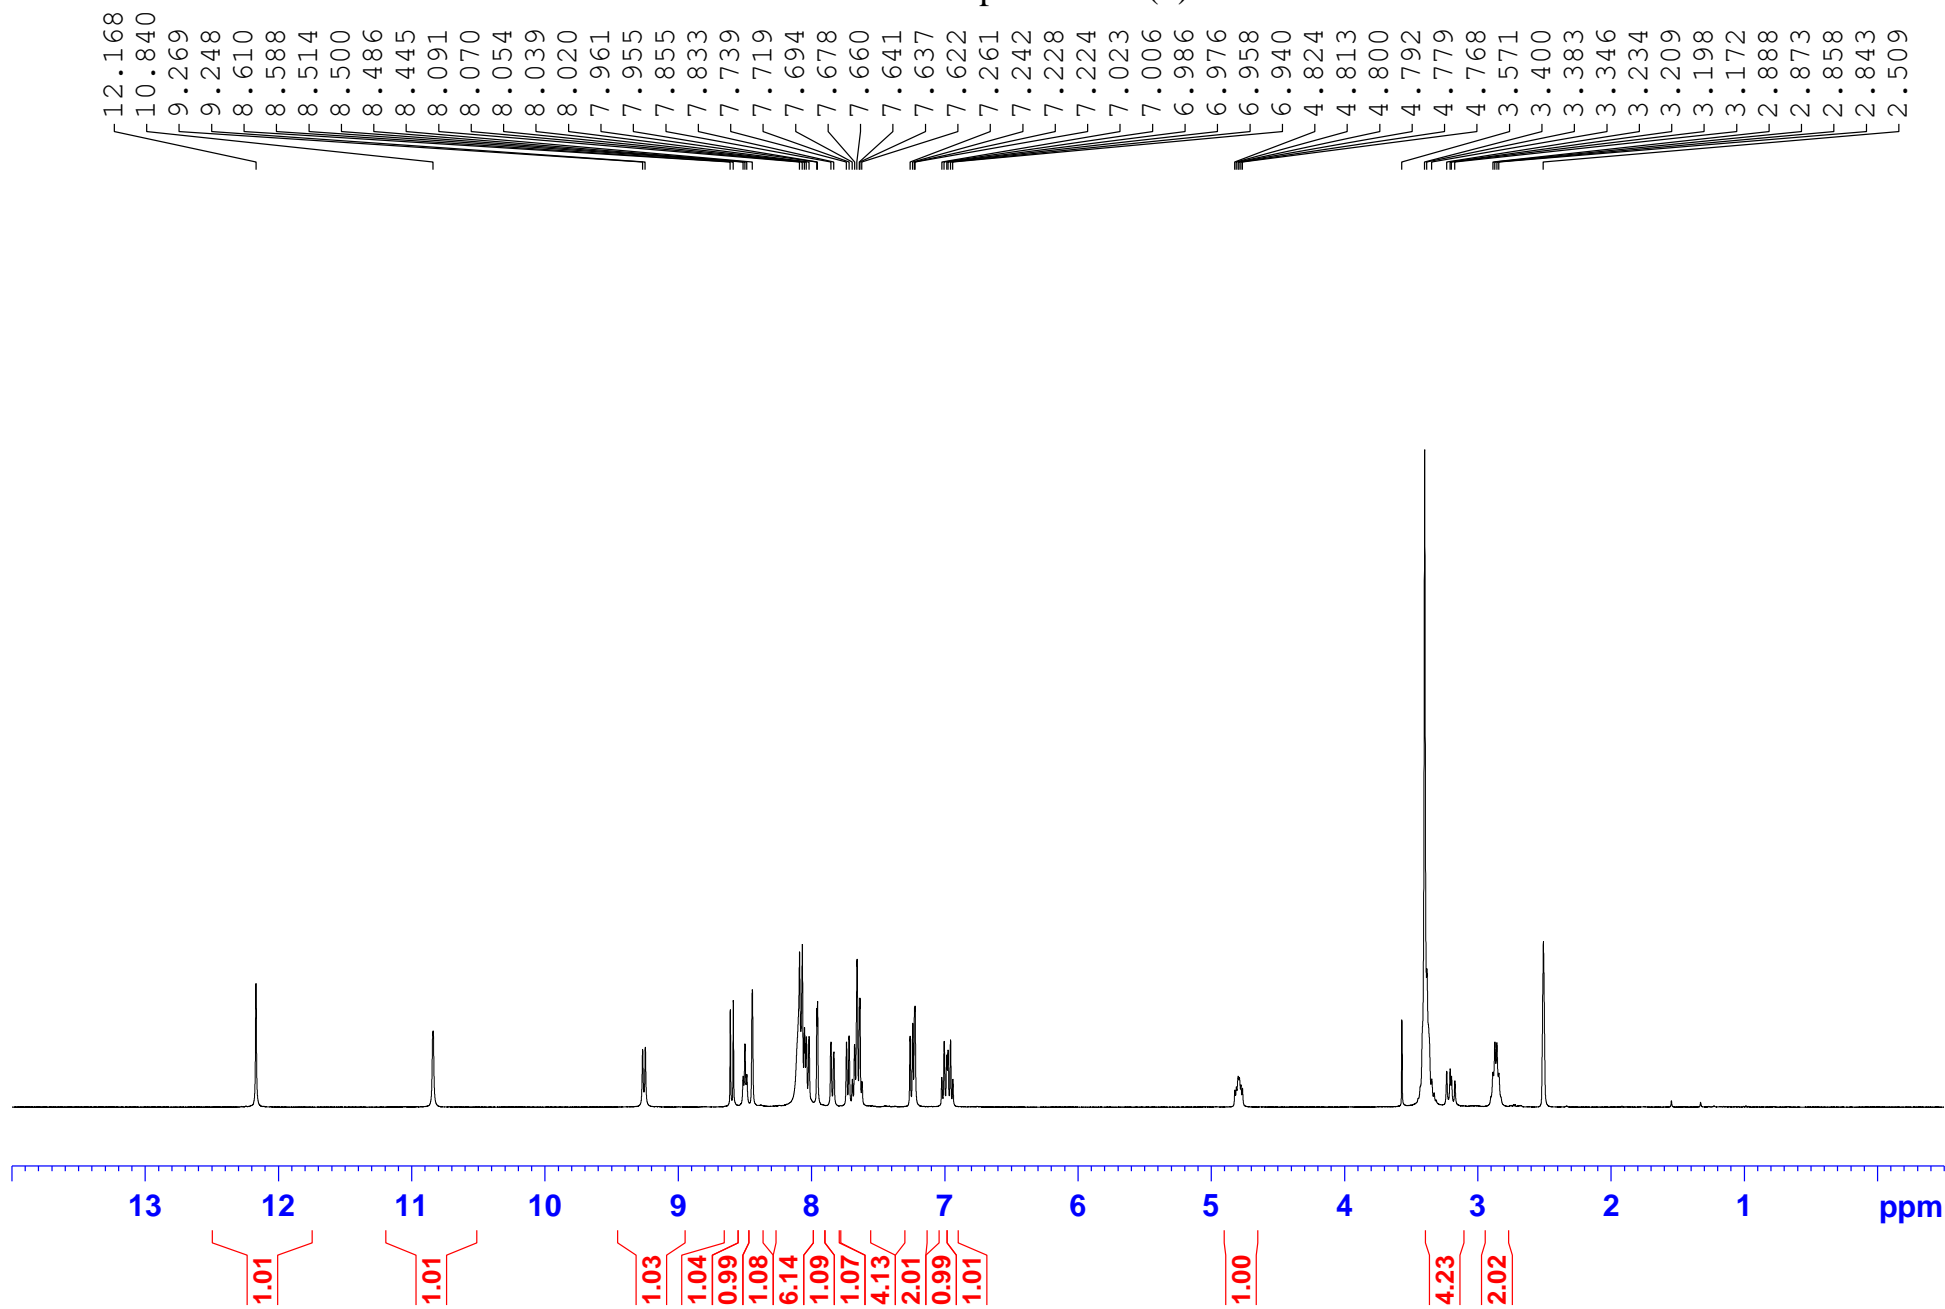



$^{13}\text{C}$  NMR spectra of (*S*)-*N*-(2-((1-((2-aminoethyl)amino)-3-(1*H*-indol-3-yl)-1-oxopropan-2-yl)carbamoyl)-4-chlorophenyl)-2-naphthamide (**3**)

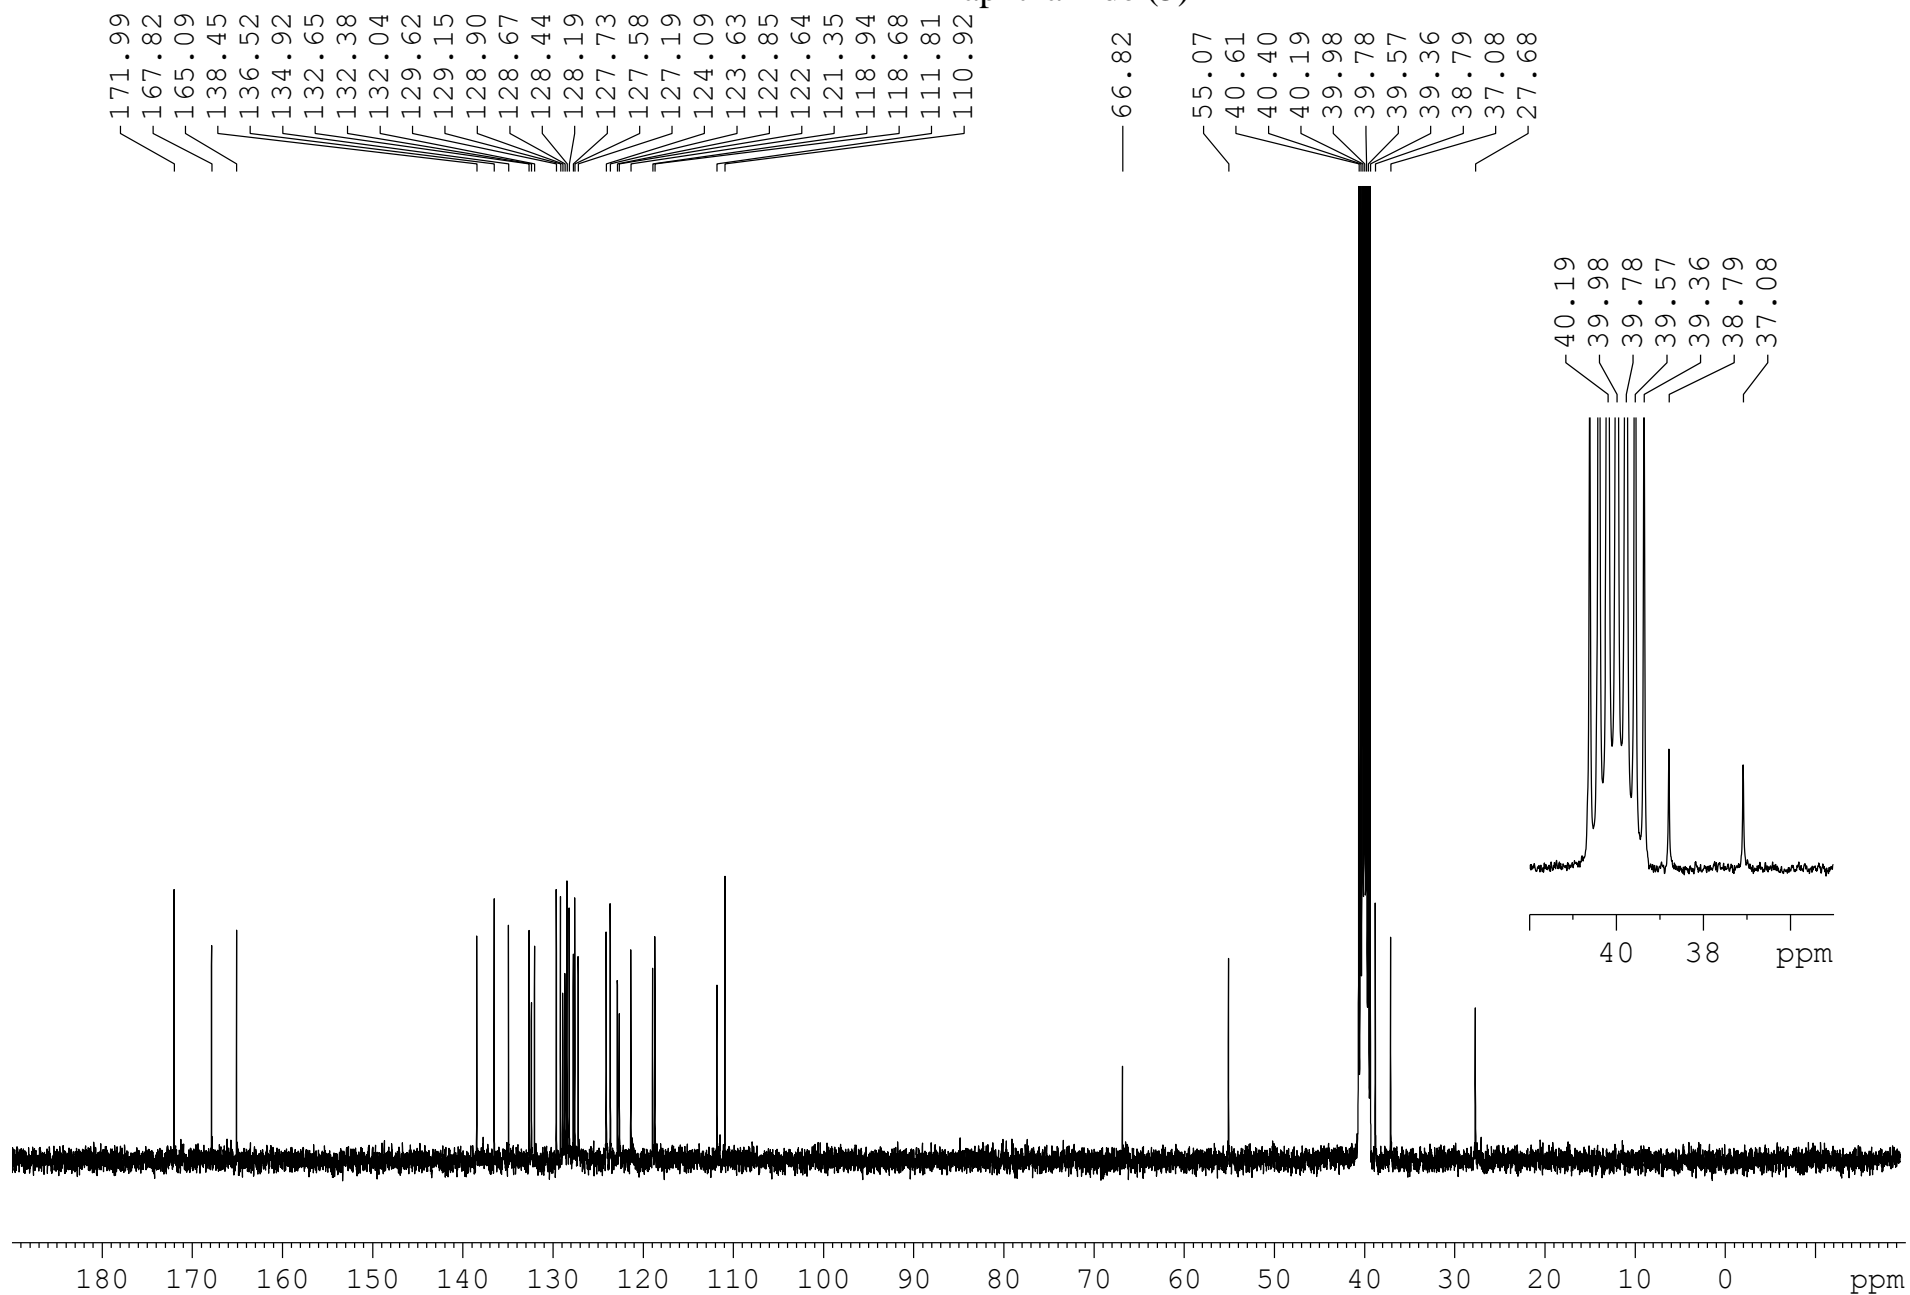

<sup>1</sup>H NMR spectra of (*S*)-*N*-(2-((1-((2-aminoethyl)amino)-3-(1*H*-indol-3-yl)-1-oxopropan-2-yl)carbamoyl)-4-bromophenyl)-2-naphthamide (**4**)

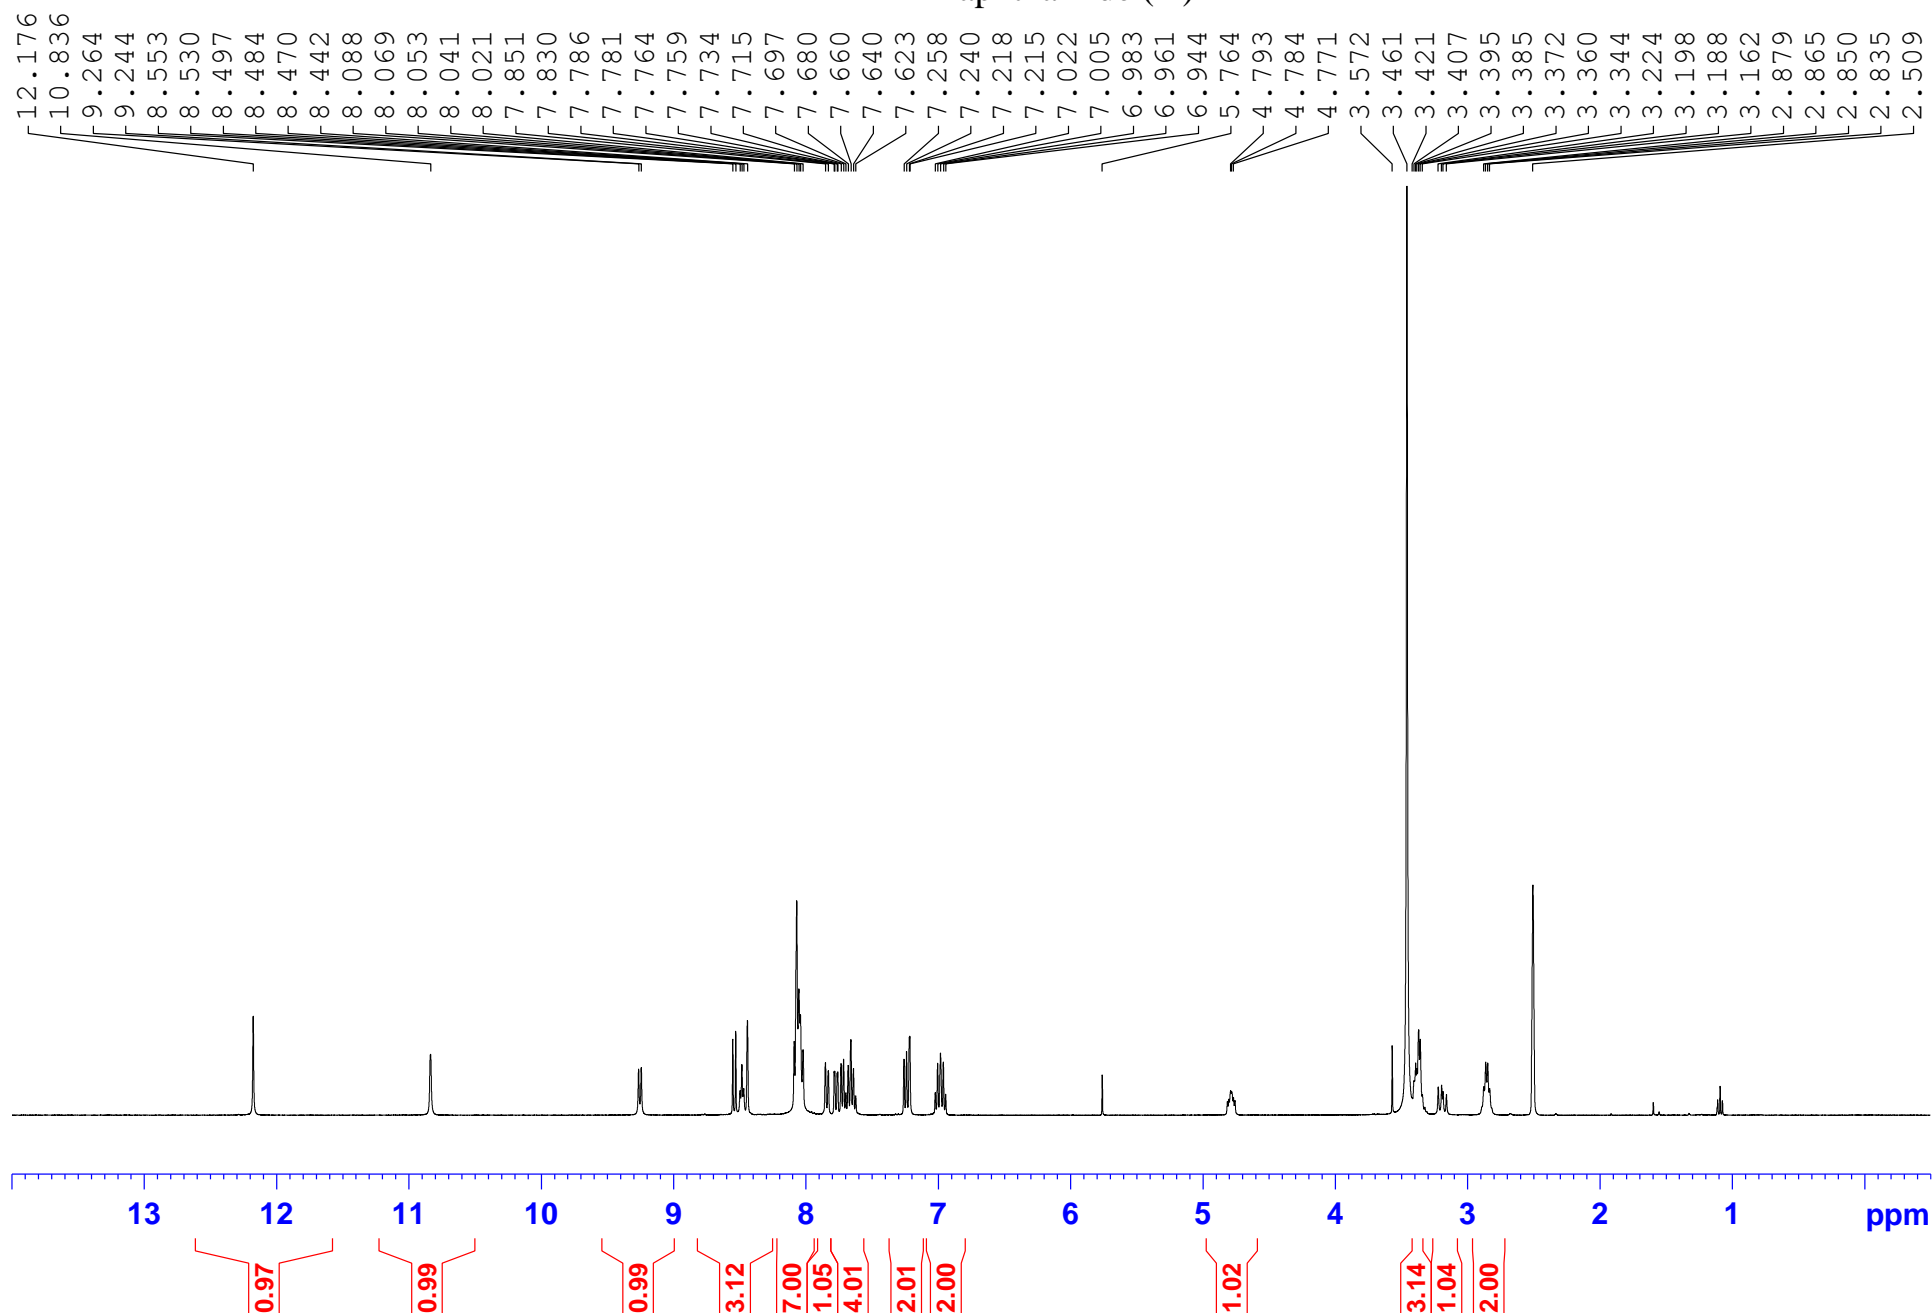

$^{13}\text{C}$  NMR spectra of (*S*)-*N*-(2-((1-((2-aminoethyl)amino)-3-(1*H*-indol-3-yl)-1-oxopropan-2-yl)carbamoyl)-4-bromophenyl)-2-naphthamide (**4**)

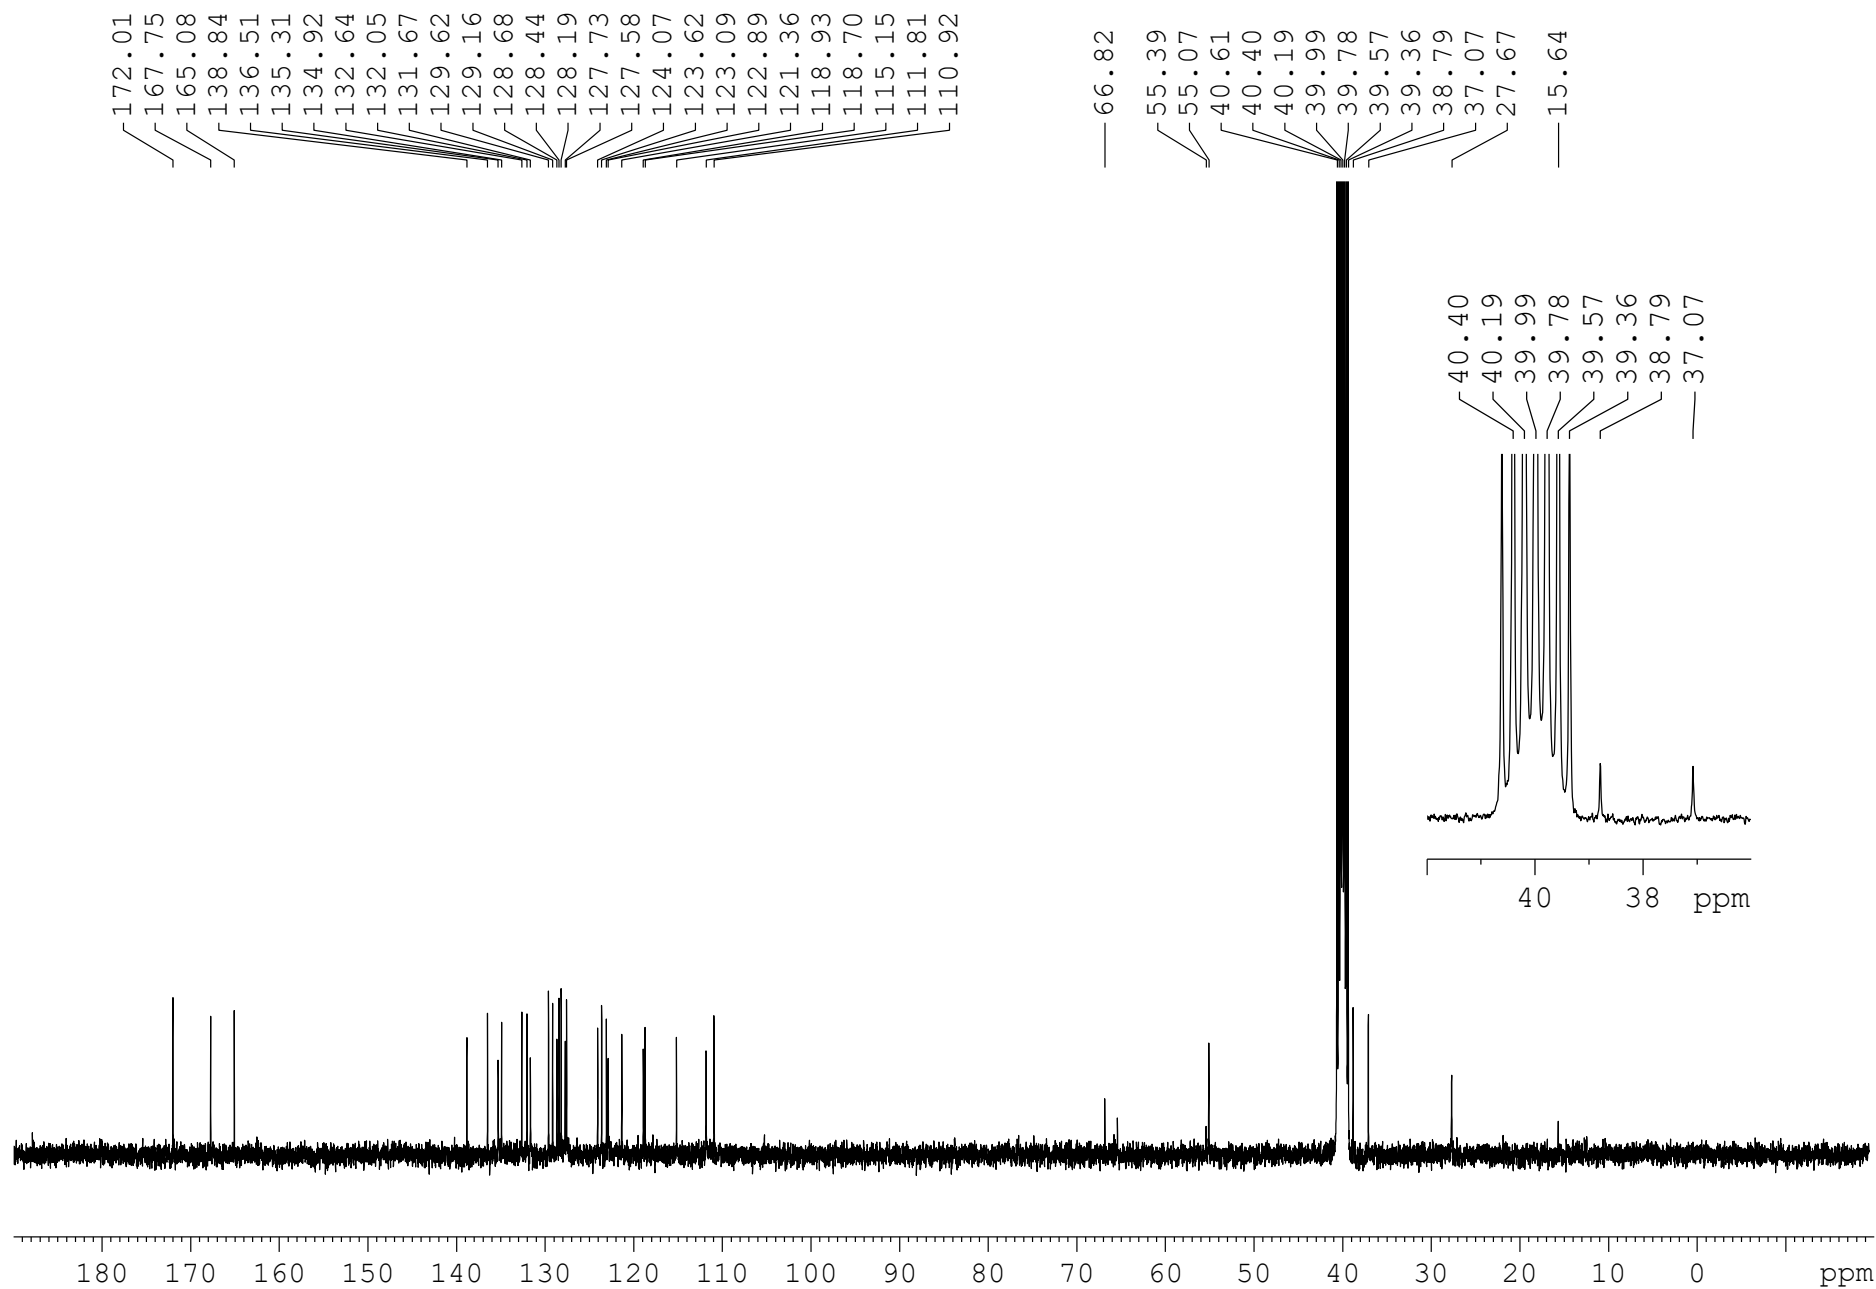

$^1\text{H}$  NMR spectra of (*S*)-*N*-(2-((1-((2-aminoethyl)amino)-3-(1*H*-indol-3-yl)-1-oxopropan-2-yl)carbamoyl)-4-methoxyphenyl)-2-naphthamide (**5**)

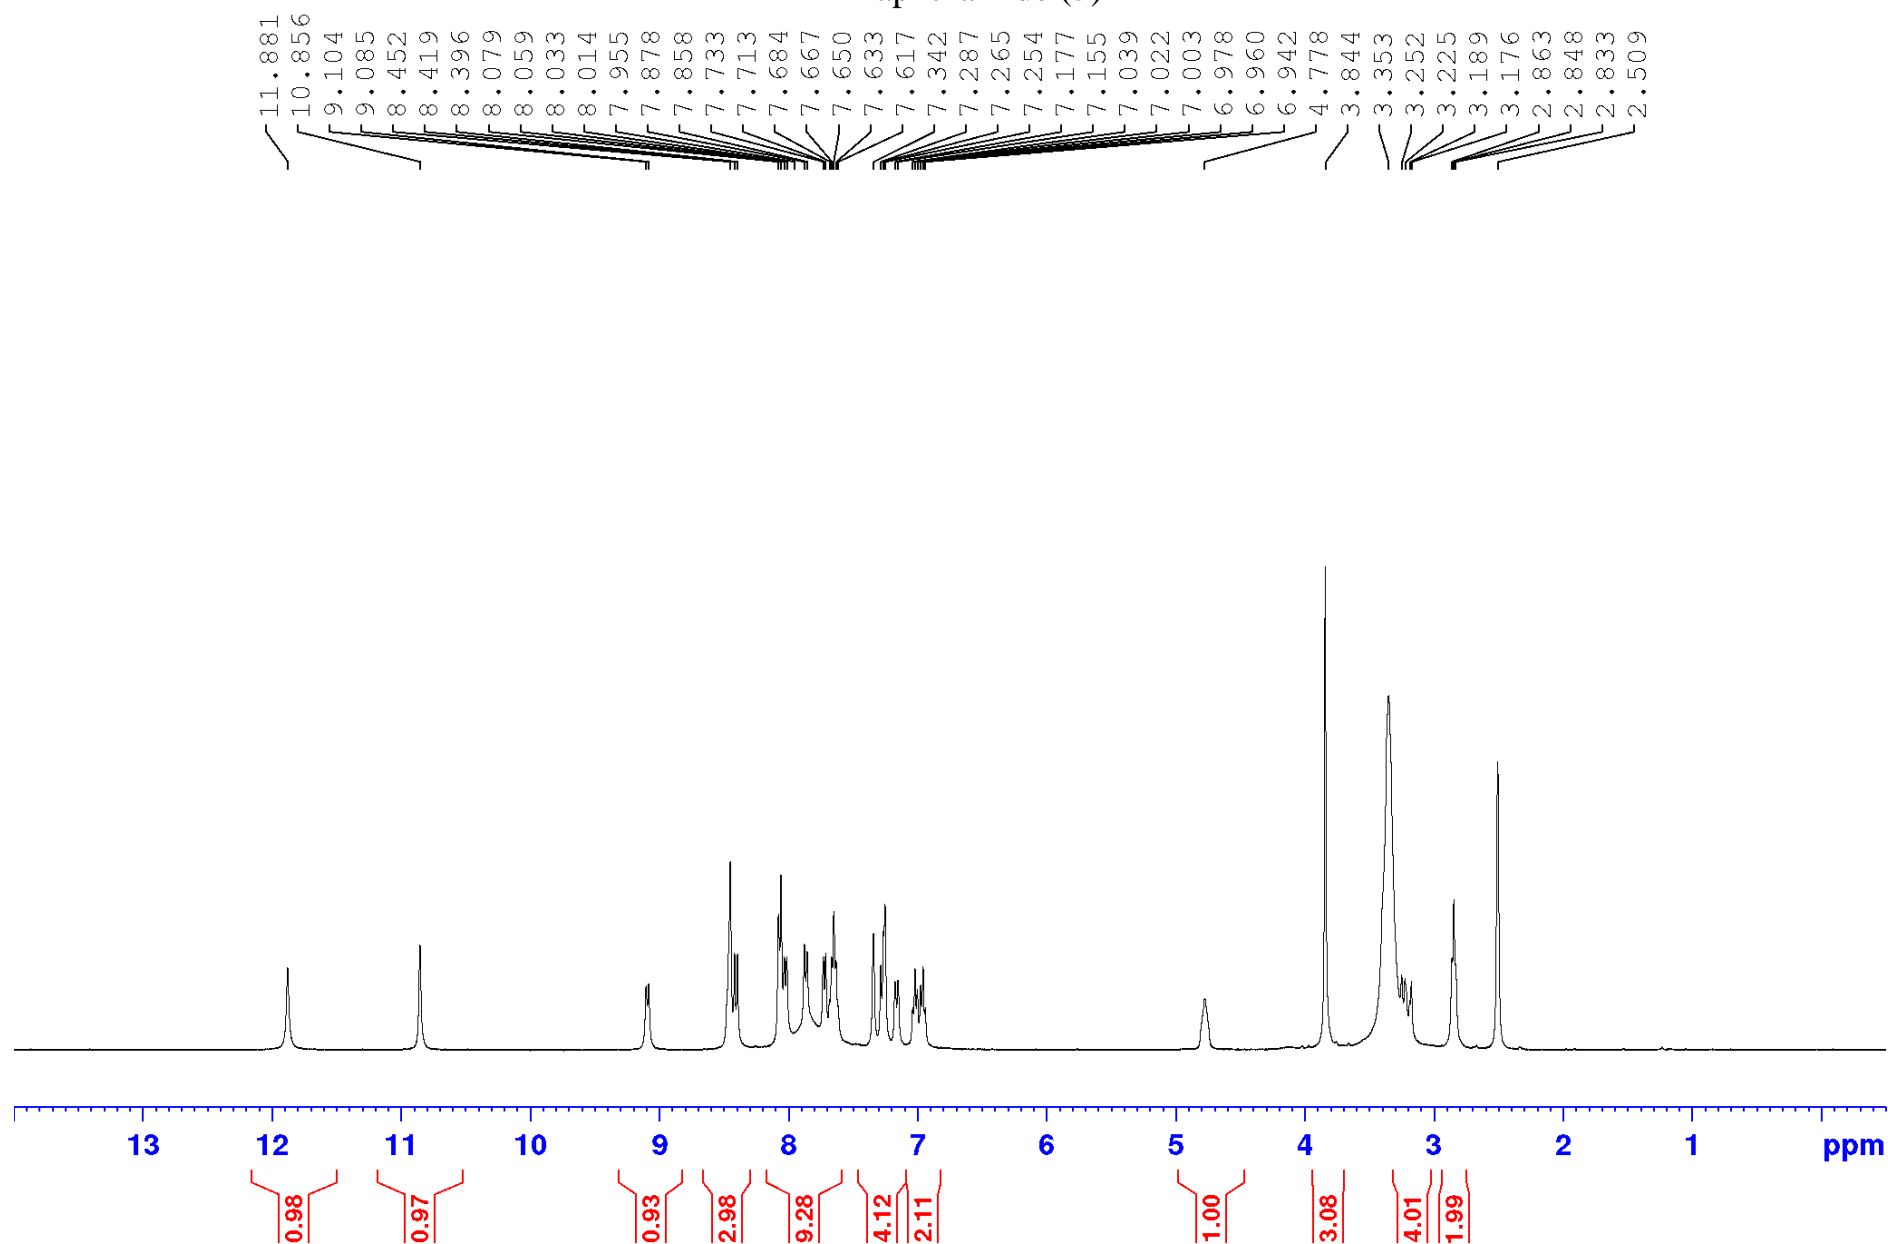

$^{13}\text{C}$  NMR spectra of (*S*)-*N*-(2-((1-((2-aminoethyl)amino)-3-(*1H*-indol-3-yl)-1-oxopropan-2-yl)carbamoyl)-4-methoxyphenyl)-2-naphthamide (**5**)

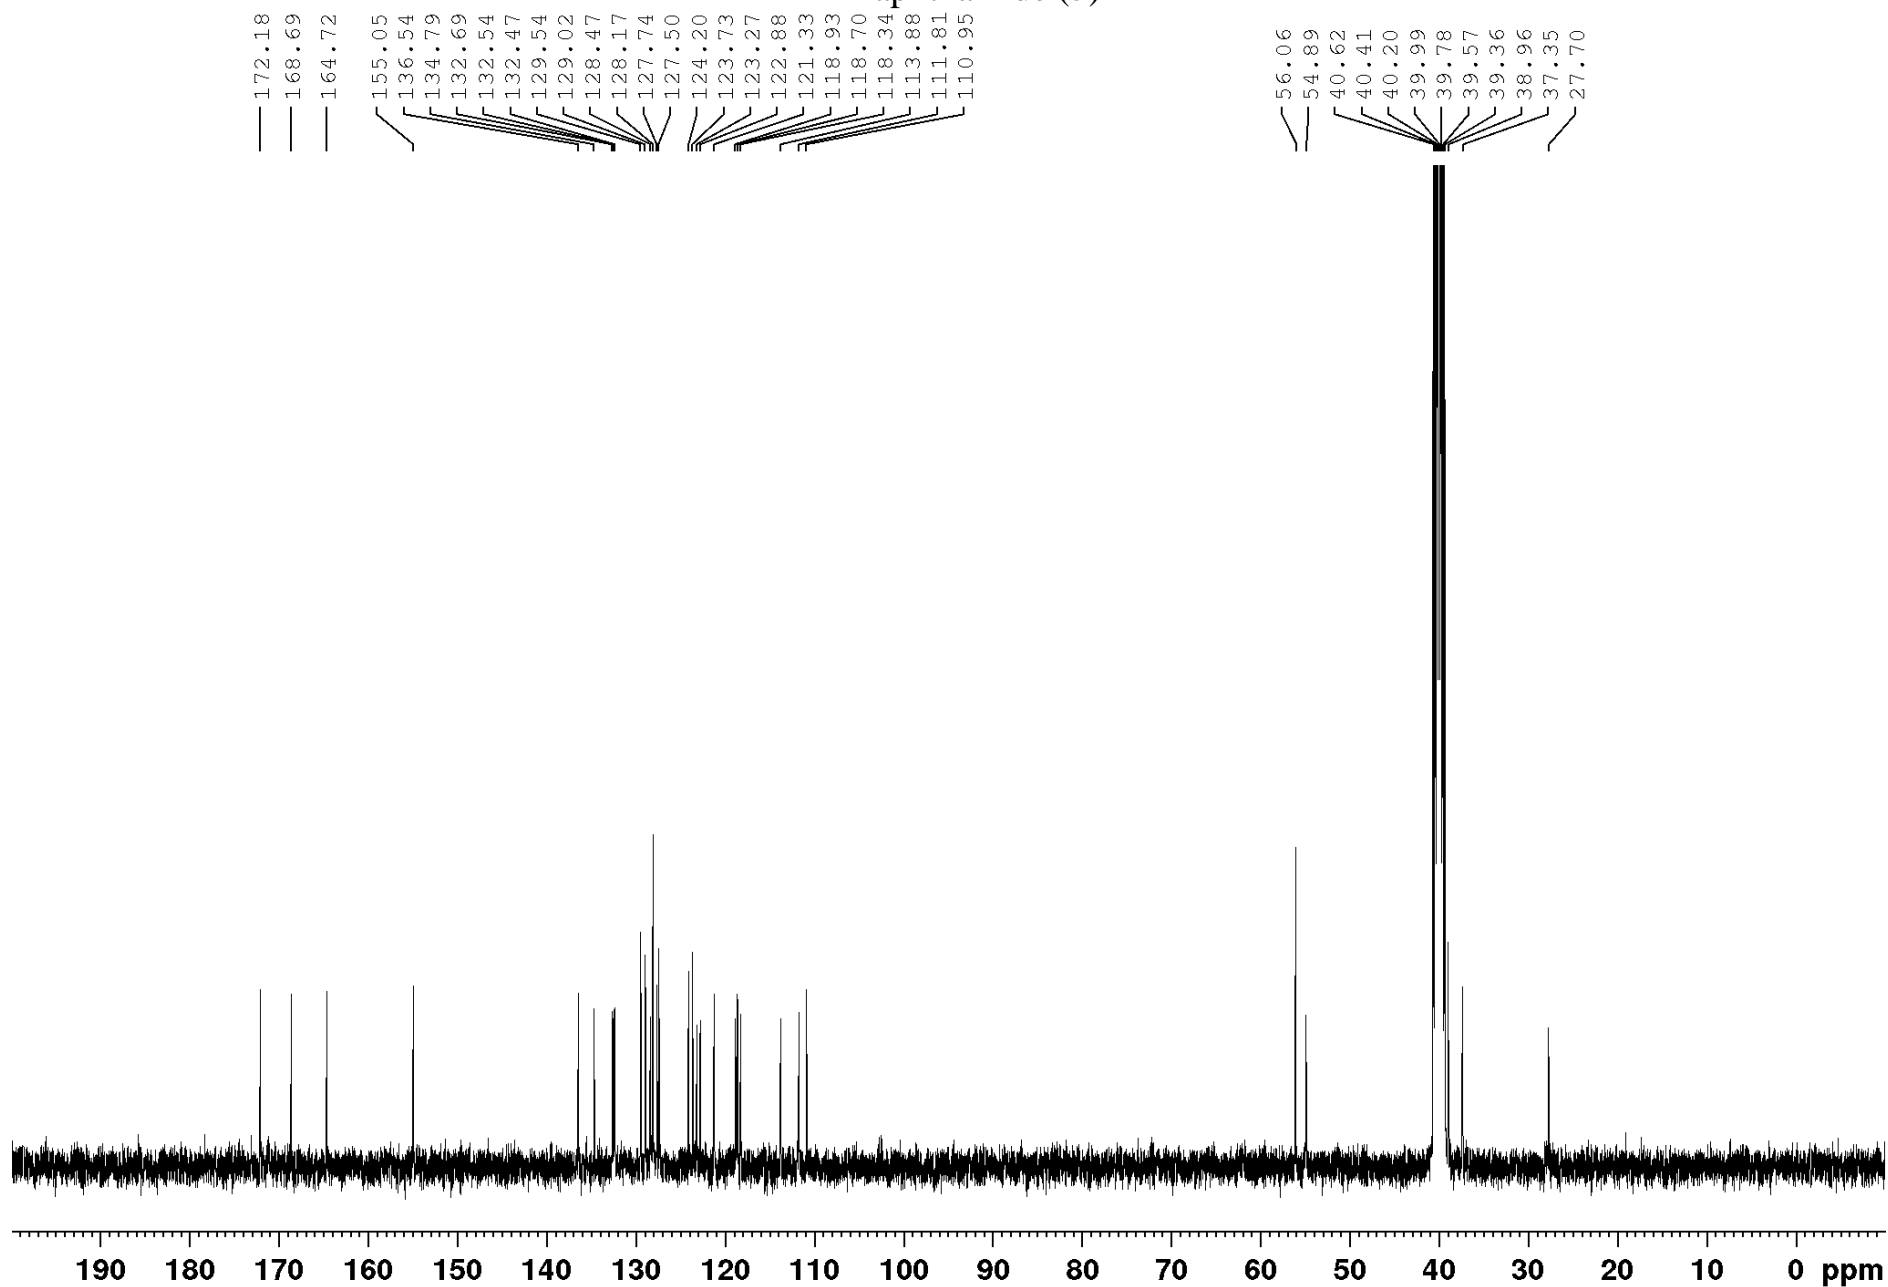

<sup>1</sup>H NMR spectra of (*S*)-*N*-(2-((1-((2-guanidinoethyl)amino)-3-(1*H*-indol-3-yl)-1-oxopropan-2-yl)carbamoyl)phenyl)-2-naphthamide  
(6)

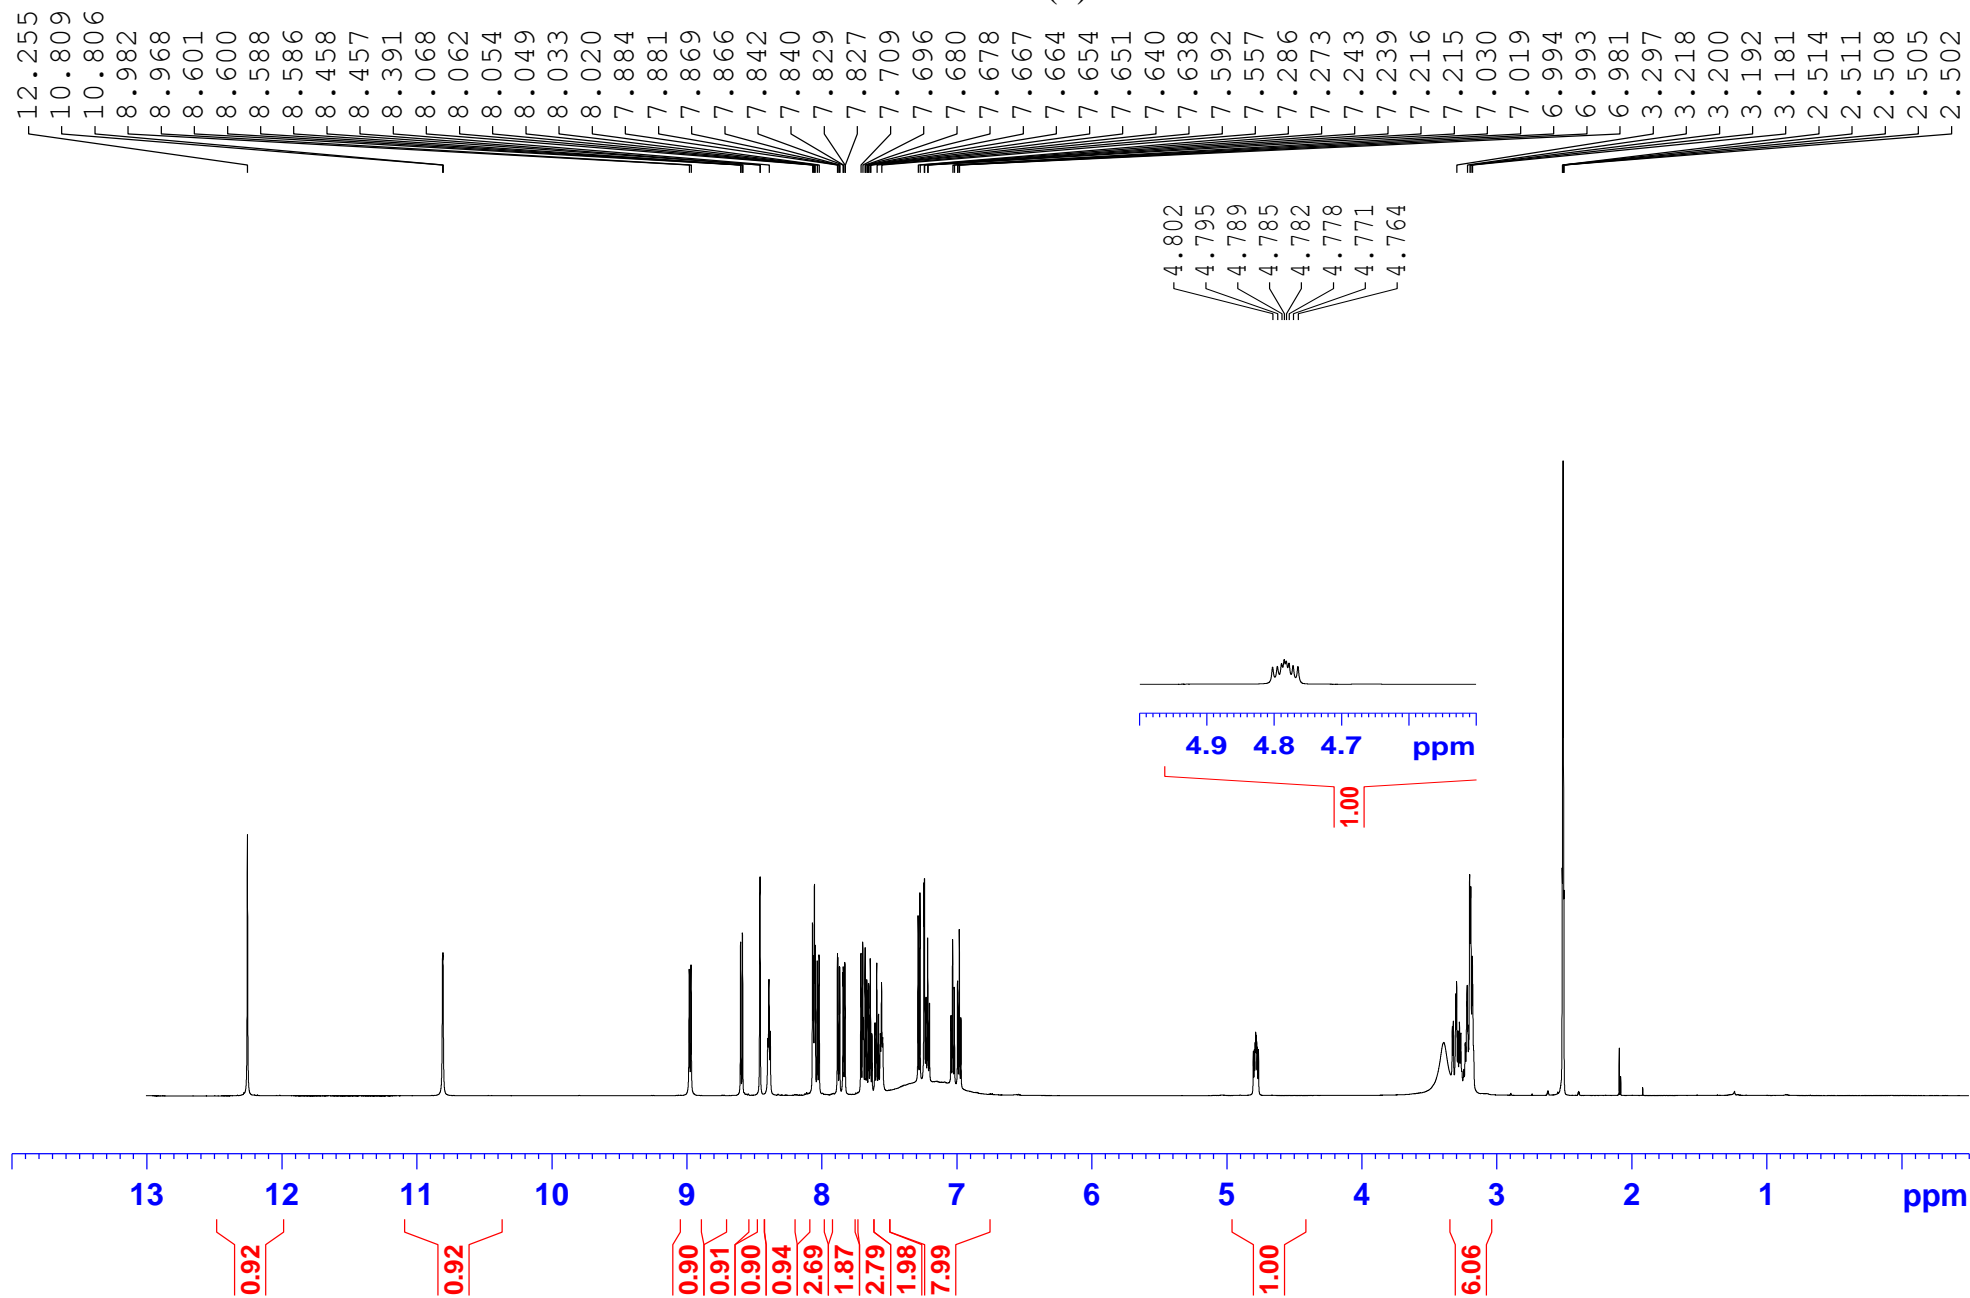

$^{13}\text{C}$  NMR spectra of (*S*)-*N*-(2-((1-((2-guanidinoethyl)amino)-3-(*1H*-indol-3-yl)-1-oxopropan-2-yl)carbamoyl)phenyl)-2-naphthamide  
(6)

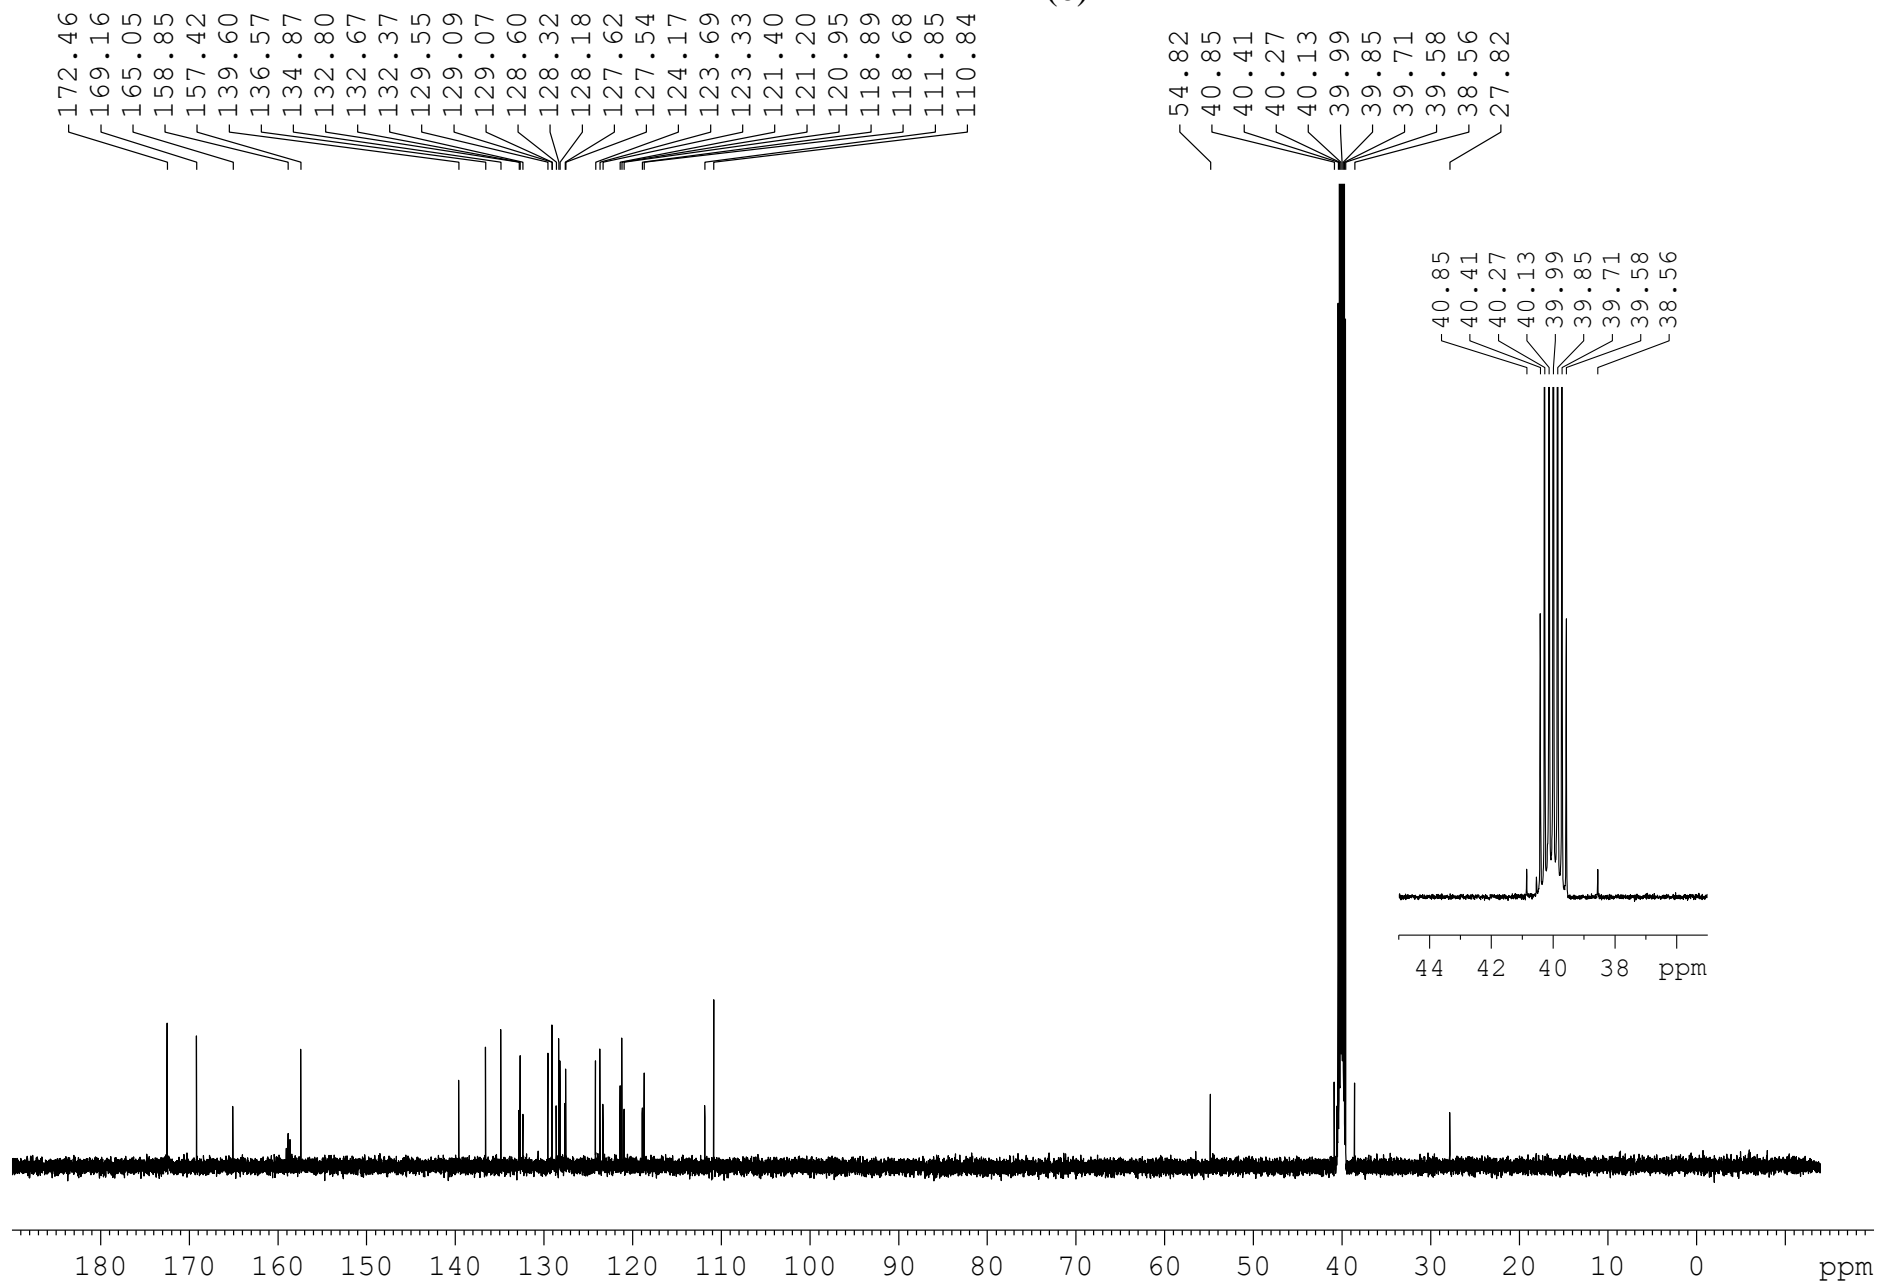

<sup>1</sup>H NMR spectra of (*S*)-*N*-(4-fluoro-2-((1-((2-guanidinoethyl)amino)-3-(1*H*-indol-3-yl)-1-oxopropan-2-yl)carbamoyl)phenyl)-2-naphthamide (7)

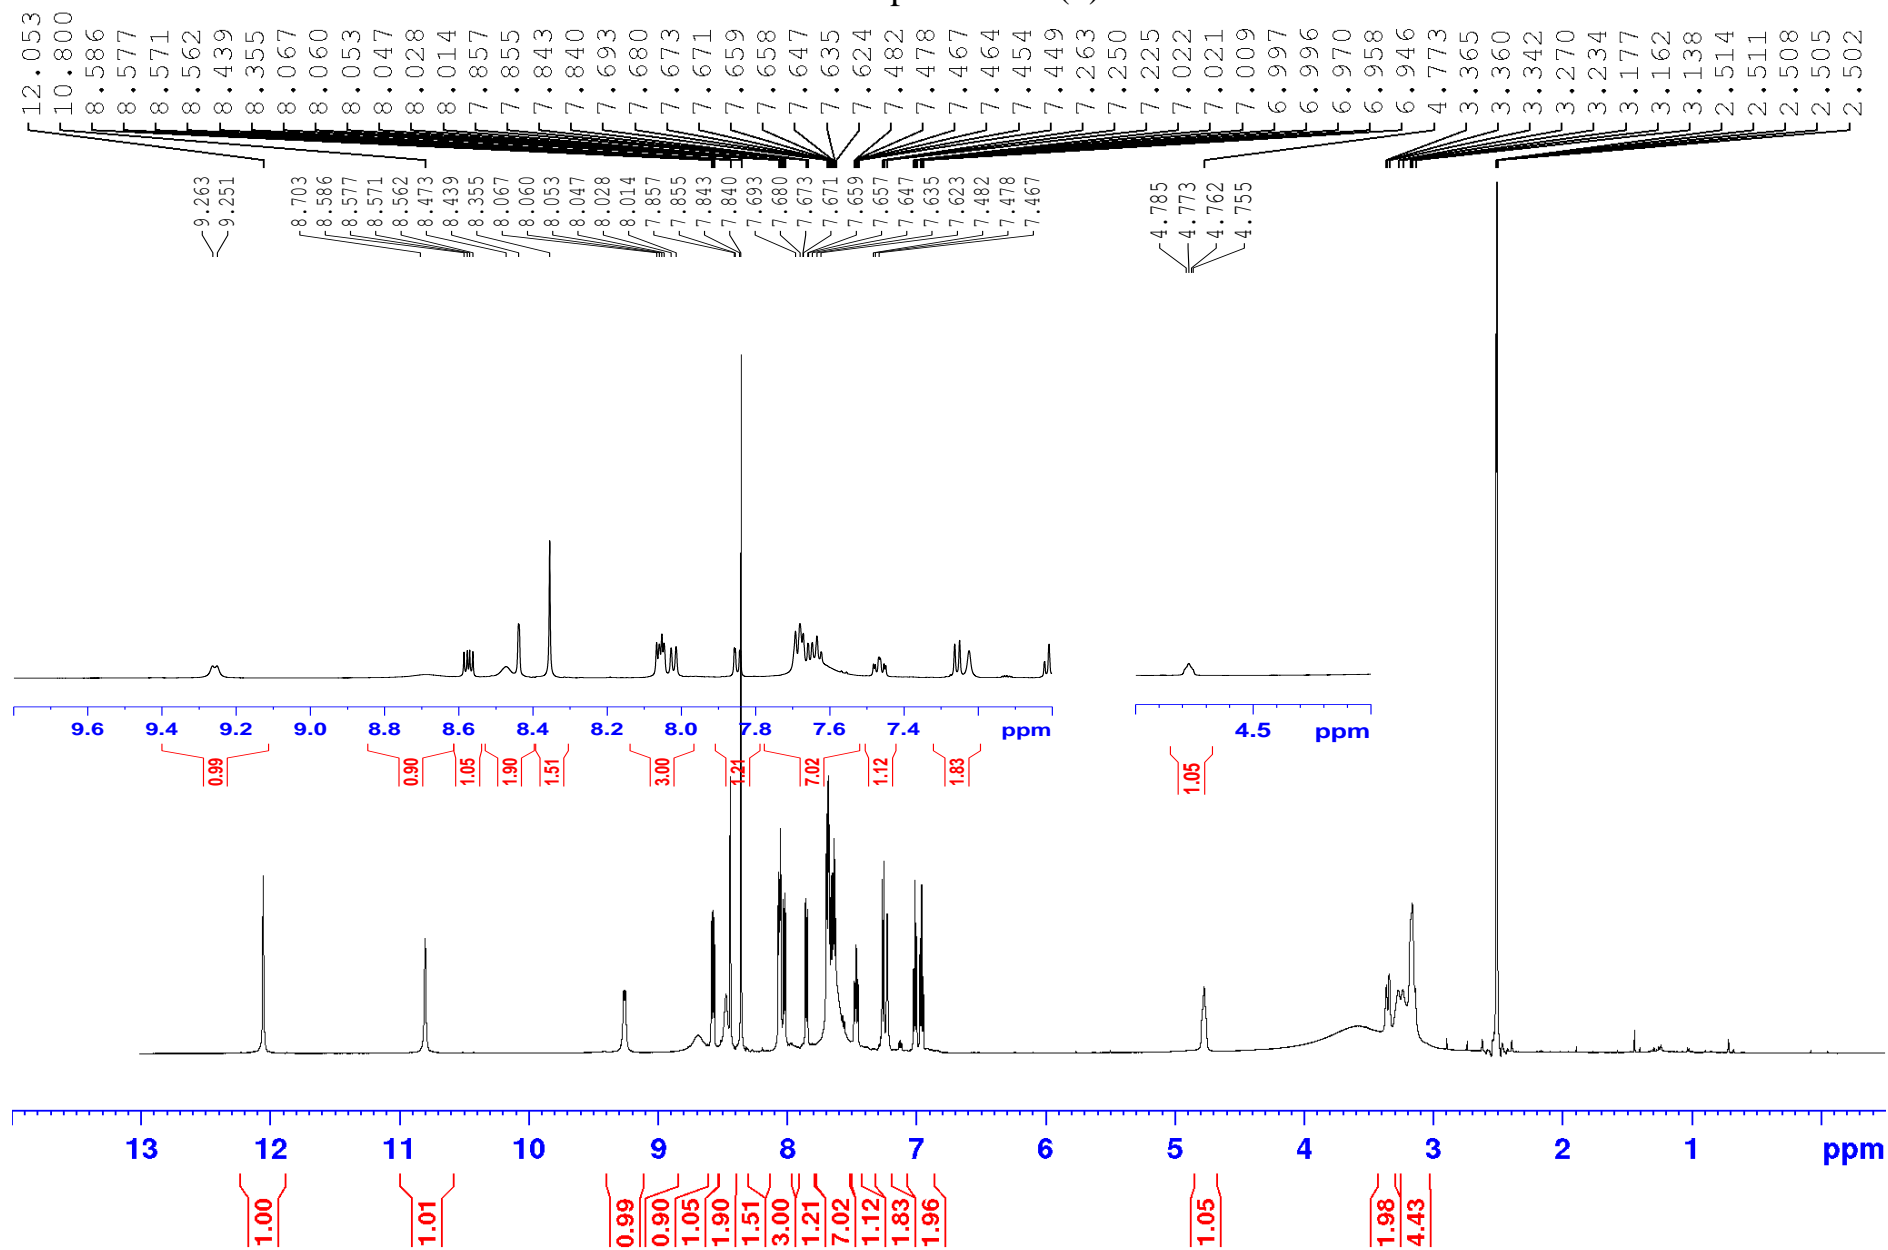



<sup>13</sup>C NMR spectra of (*S*)-*N*-(4-fluoro-2-((1-((2-guanidinoethyl)amino)-3-(1*H*-indol-3-yl)-1-oxopropan-2-yl)carbamoyl)phenyl)-2-naphthamide (**7**)

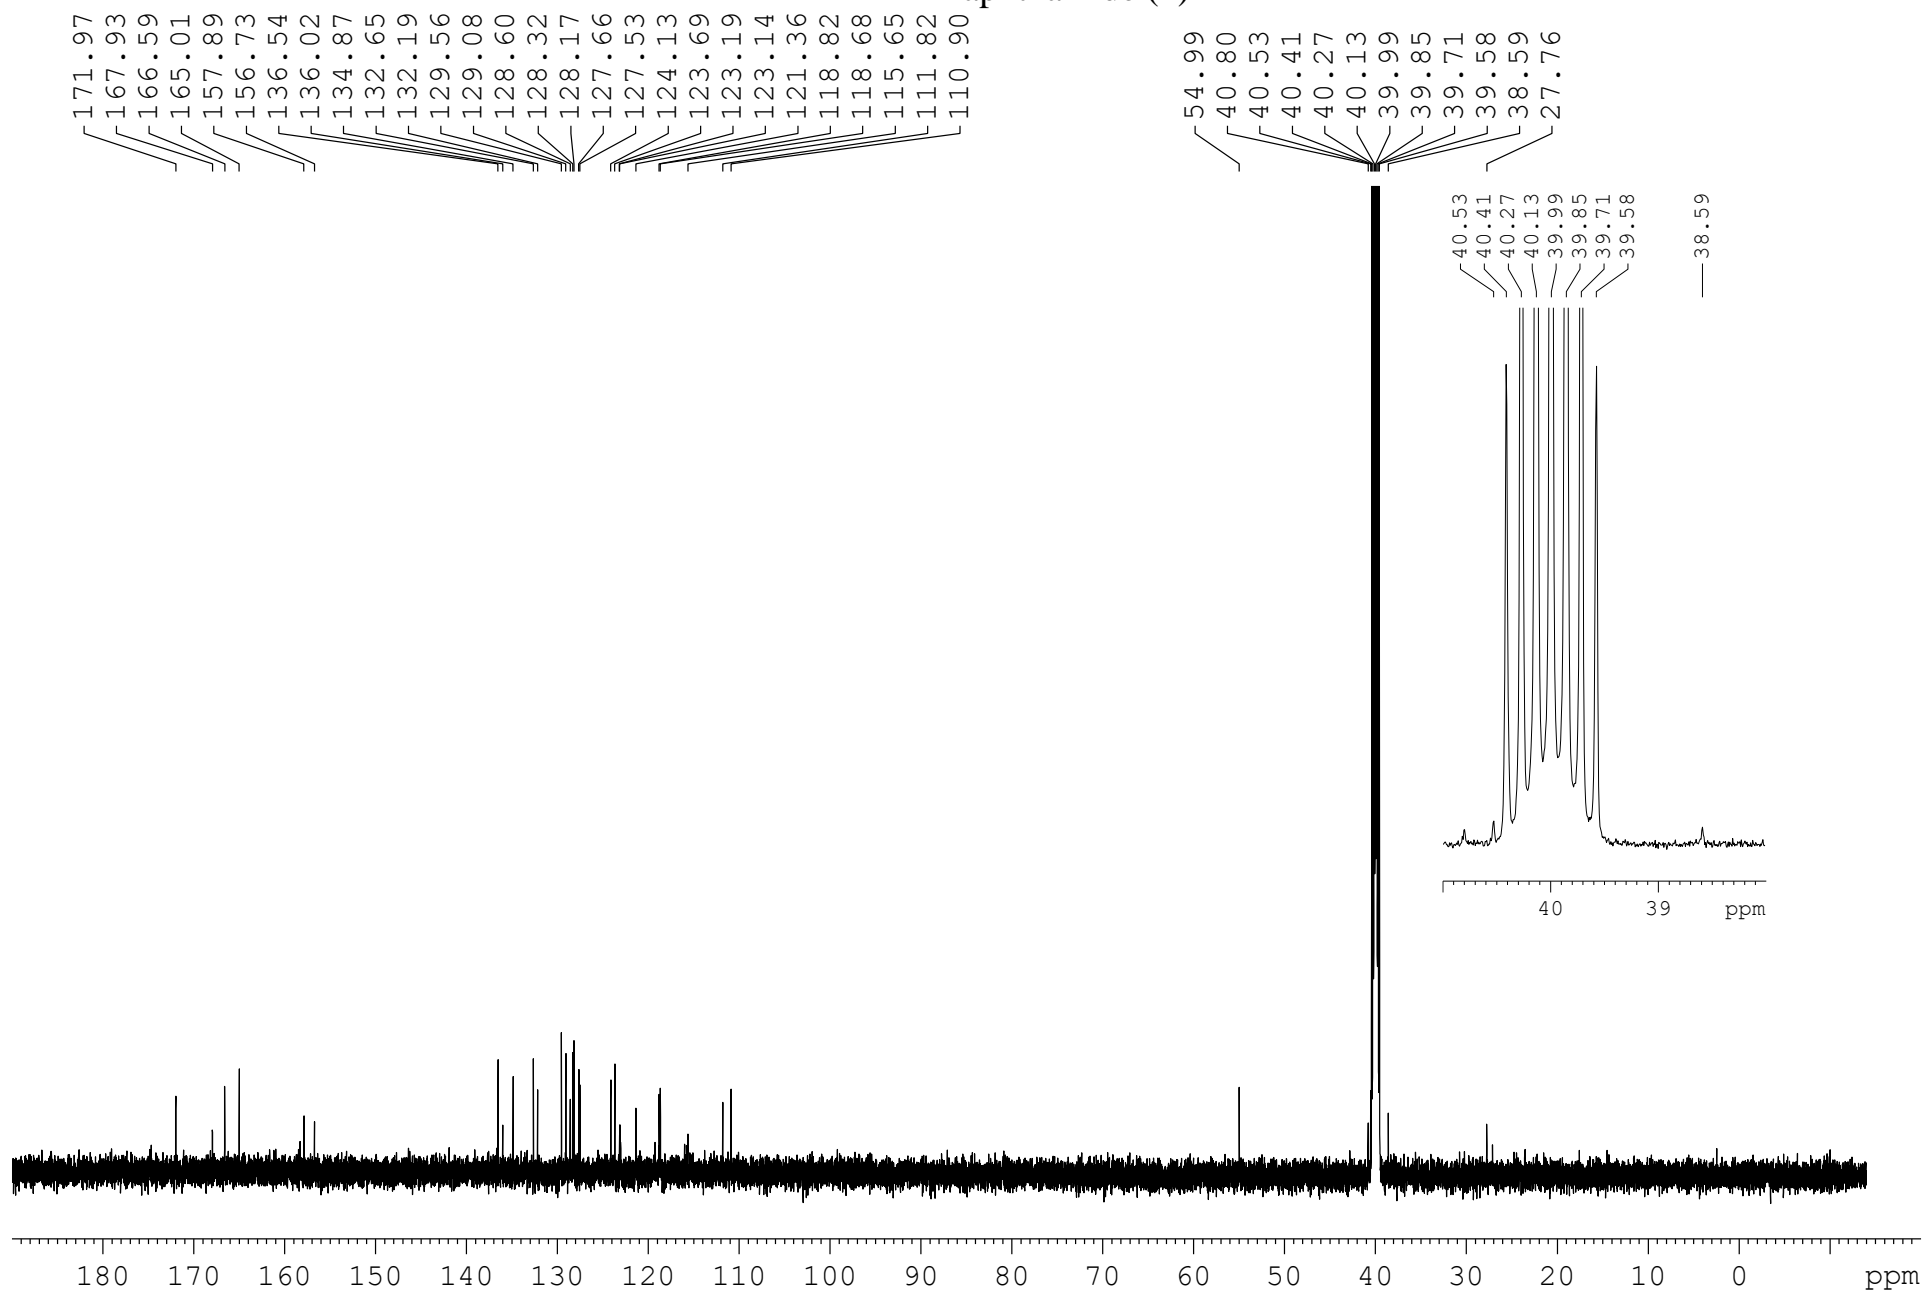

<sup>1</sup>H NMR spectra of (S)-N-(4-chloro-2-((1-((2-guanidinoethyl)amino)-3-(1*H*-indol-3-yl)-1-oxopropan-2-yl)carbamoyl)phenyl)-2-naphthamide (**8**)

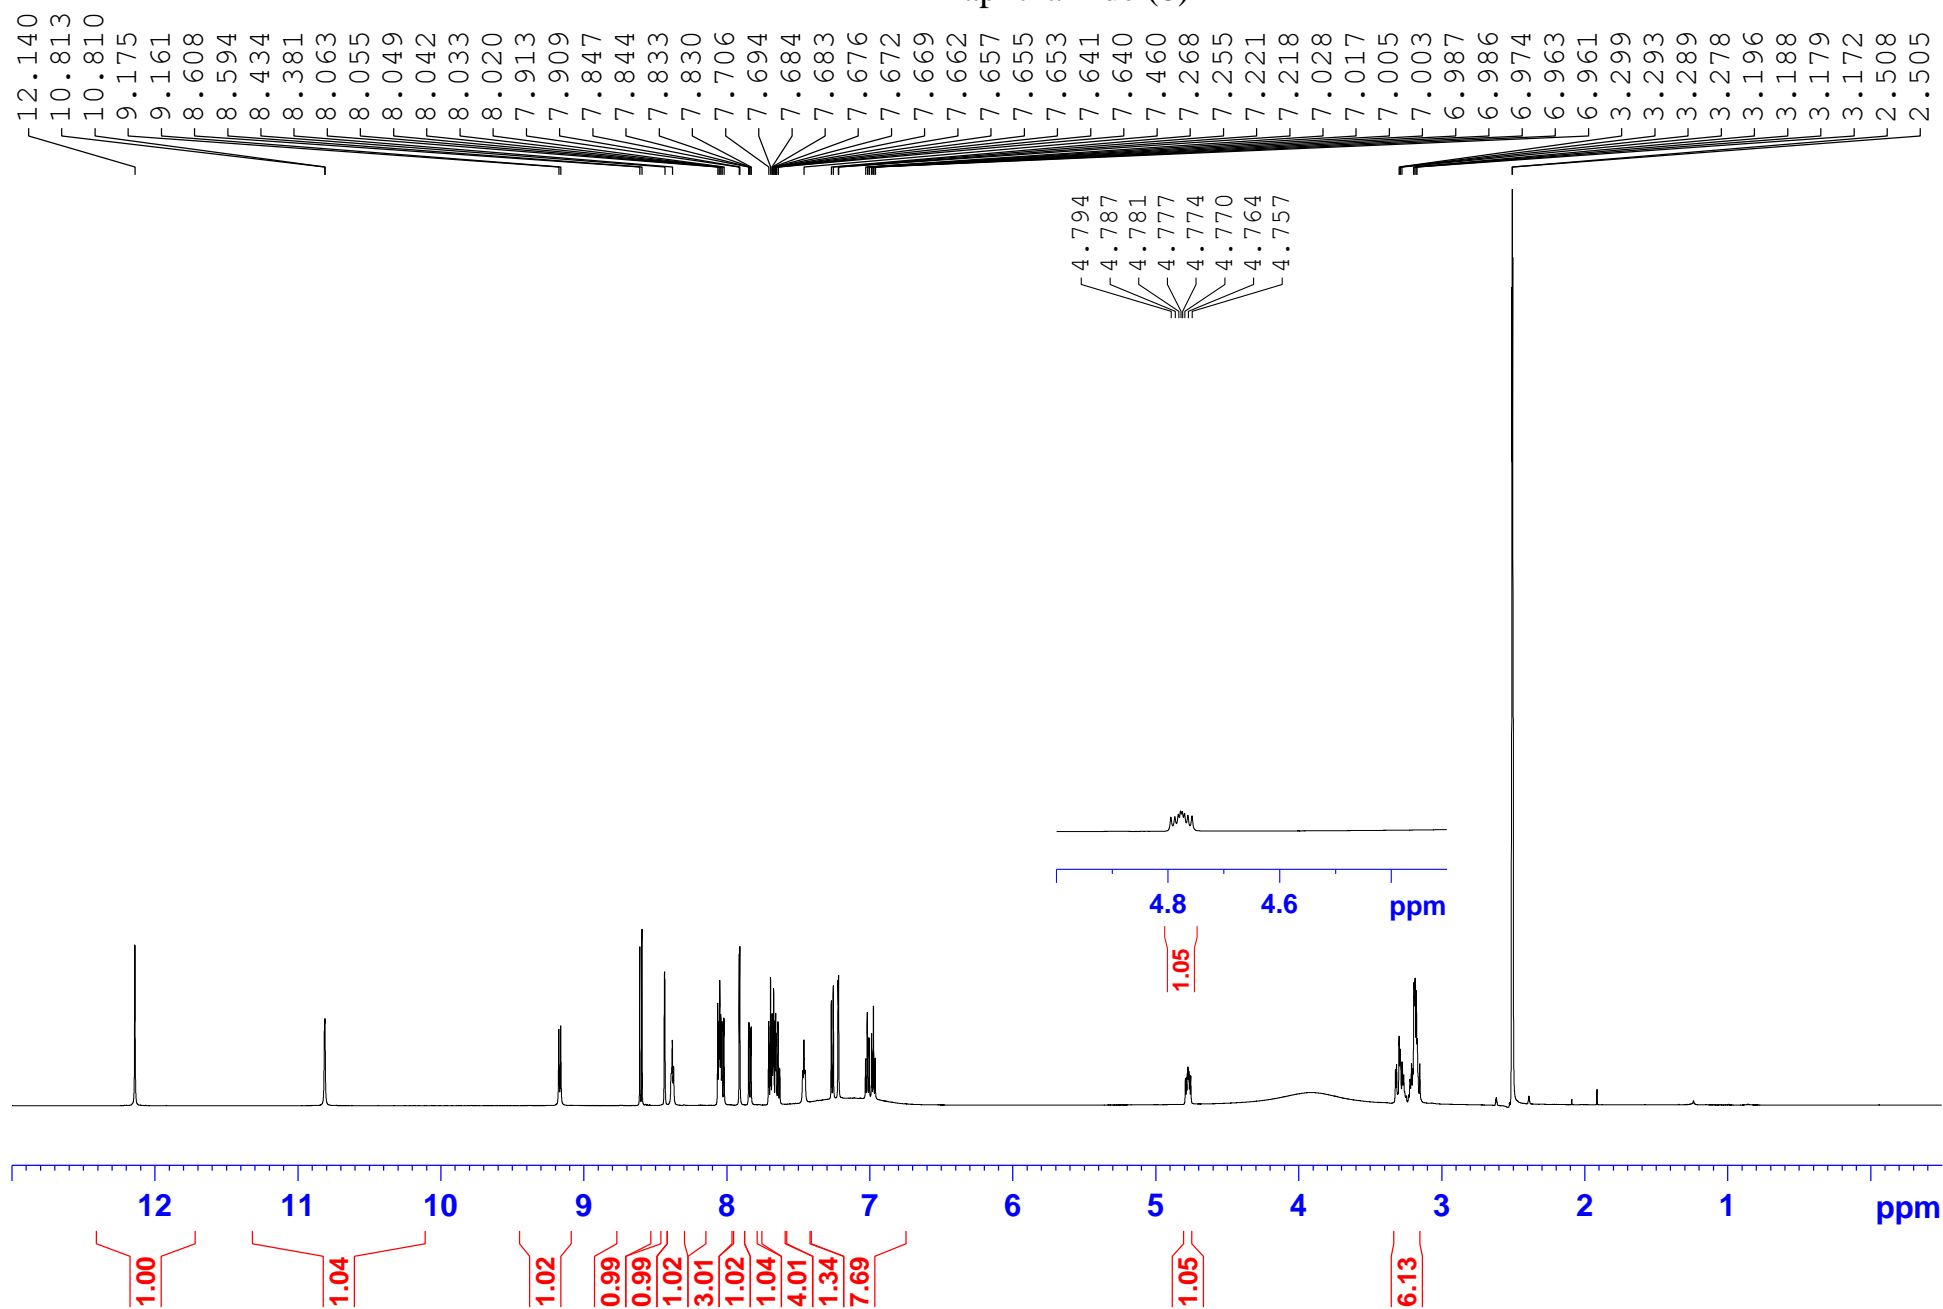

$^{13}\text{C}$  NMR spectra of (*S*)-*N*-(4-chloro-2-((1-((2-guanidinoethyl)amino)-3-(*1H*-indol-3-yl)-1-oxopropan-2-yl)carbamoyl)phenyl)-2-naphthamide (**8**)

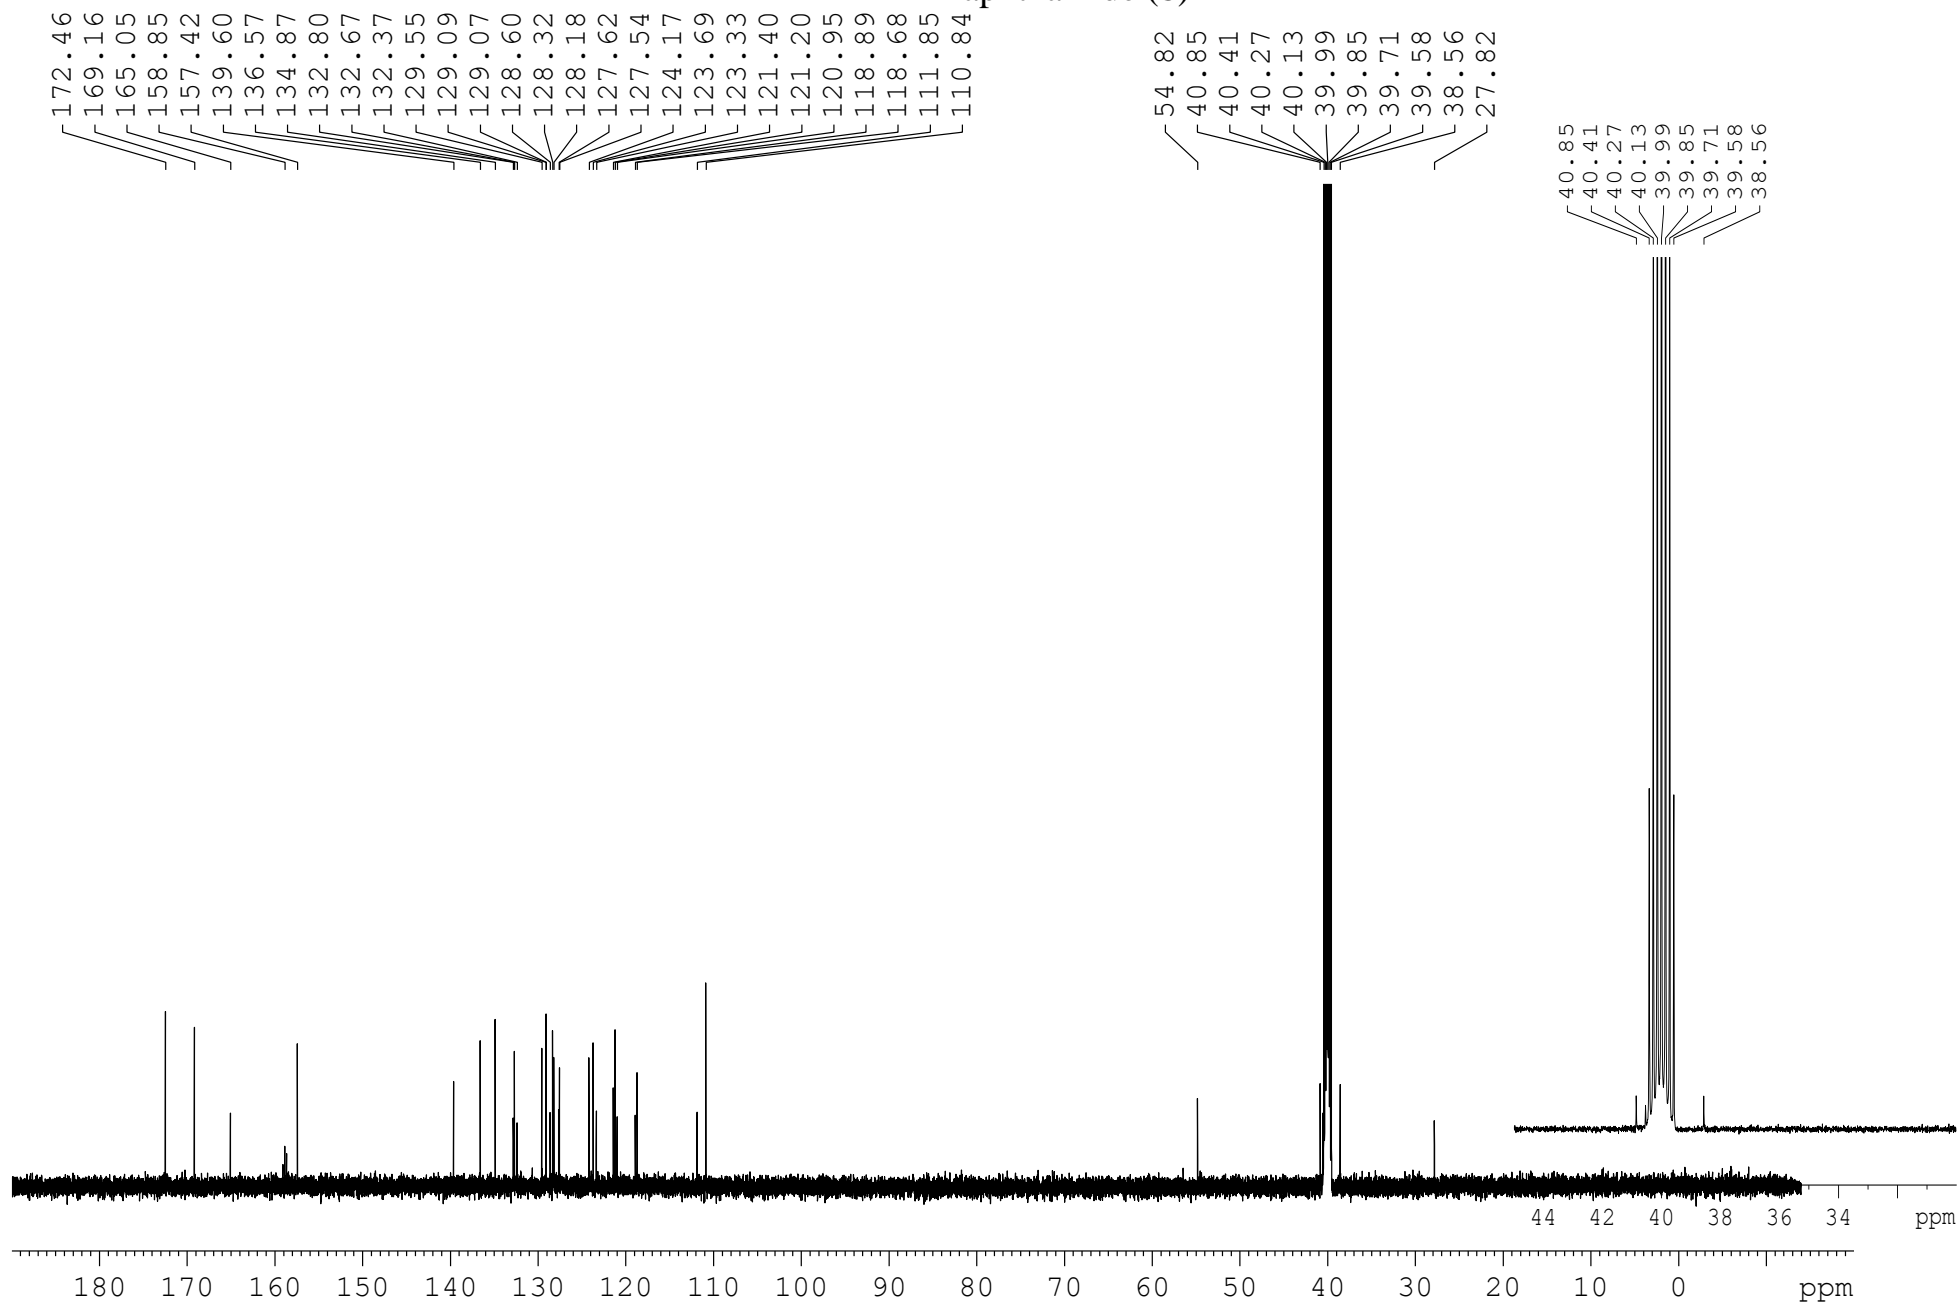

<sup>1</sup>H NMR spectra of (S)-N-(4-bromo-2-((1-((2-guanidinoethyl)amino)-3-(1*H*-indol-3-yl)-1-oxopropan-2-yl)carbamoyl)phenyl)-2-naphthamide (**9**)

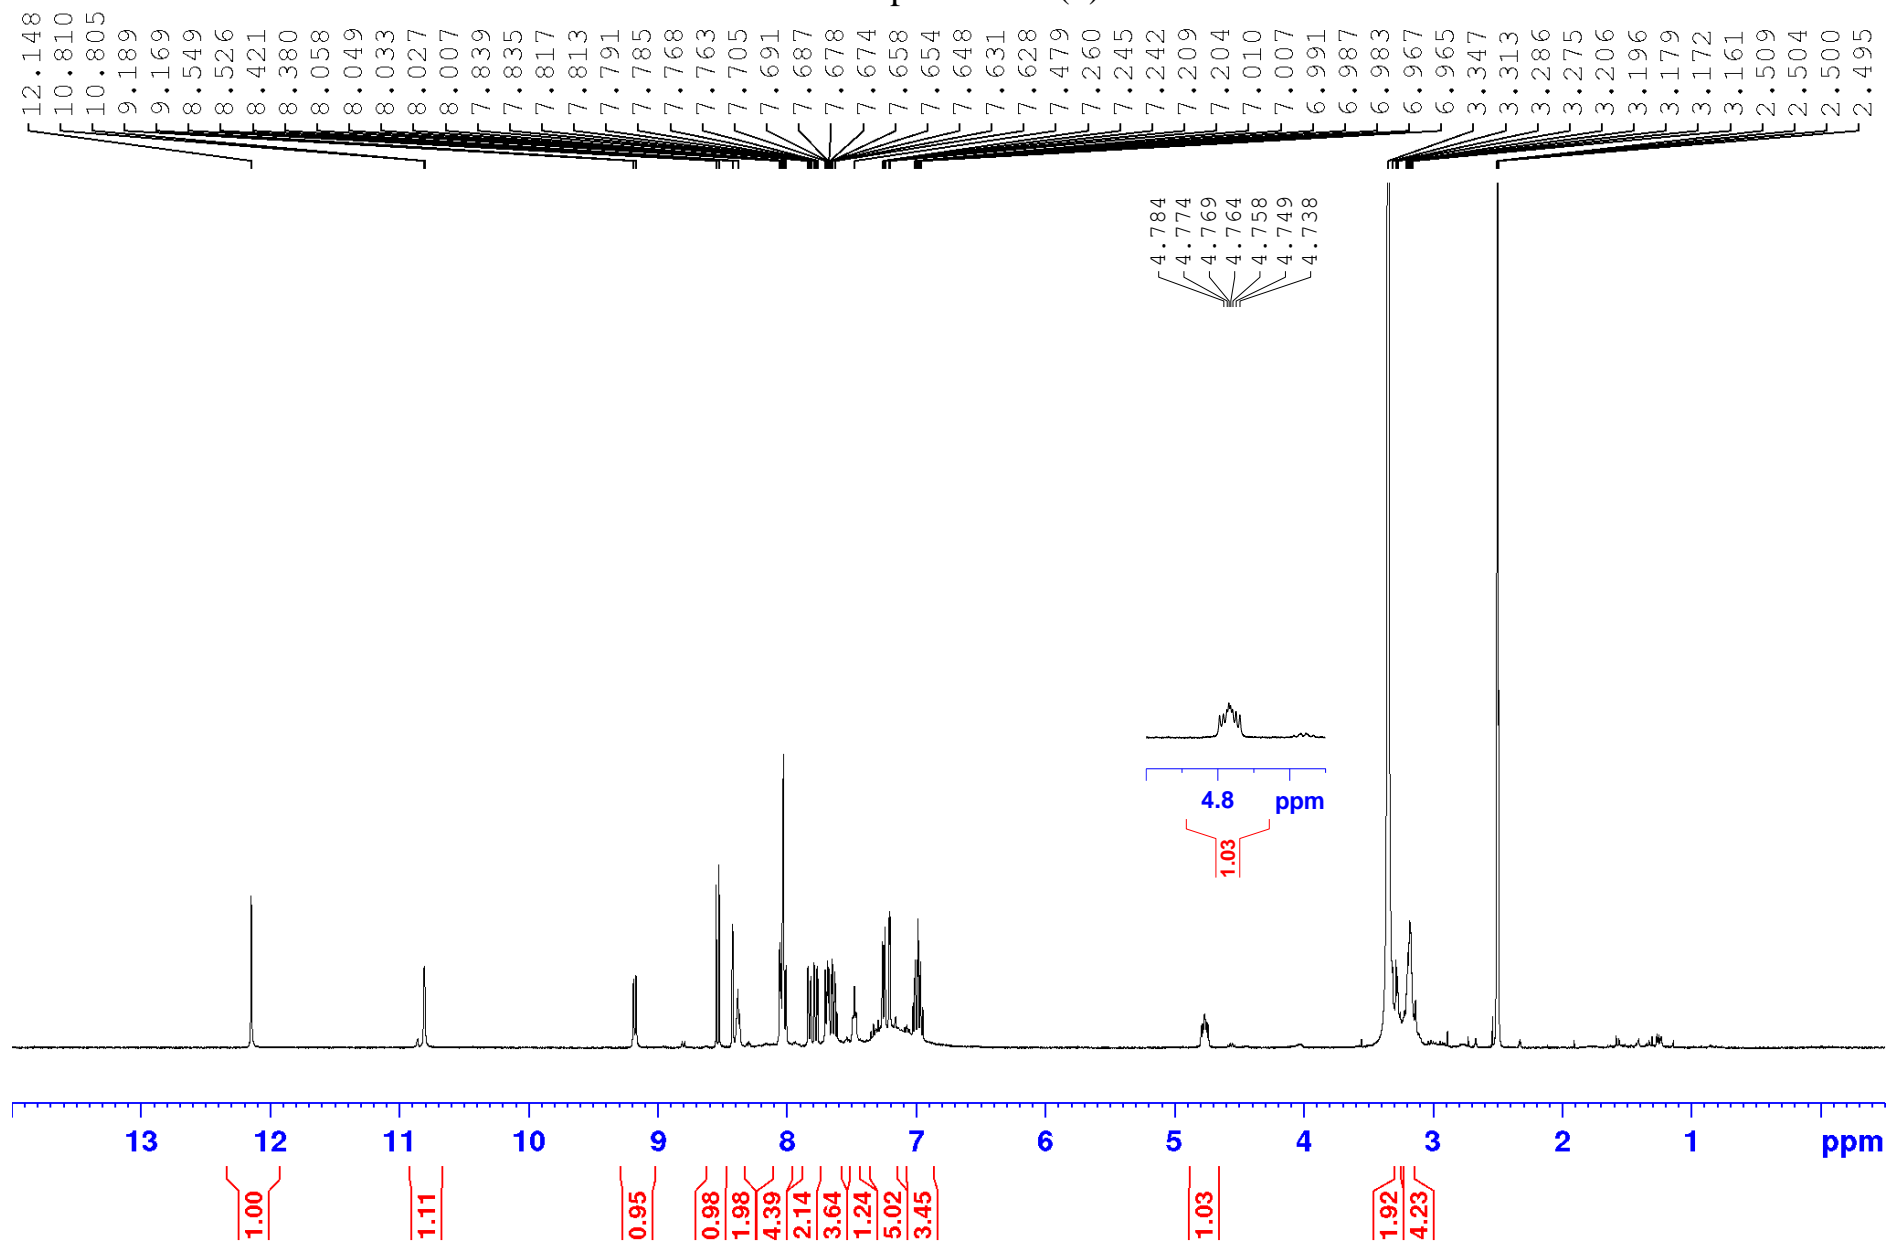

$^{13}\text{C}$  NMR spectra of (*S*)-*N*-(4-bromo-2-((1-((2-guanidinoethyl)amino)-3-(1*H*-indol-3-yl)-1-oxopropan-2-yl)carbamoyl)phenyl)-2-naphthamide (**9**)

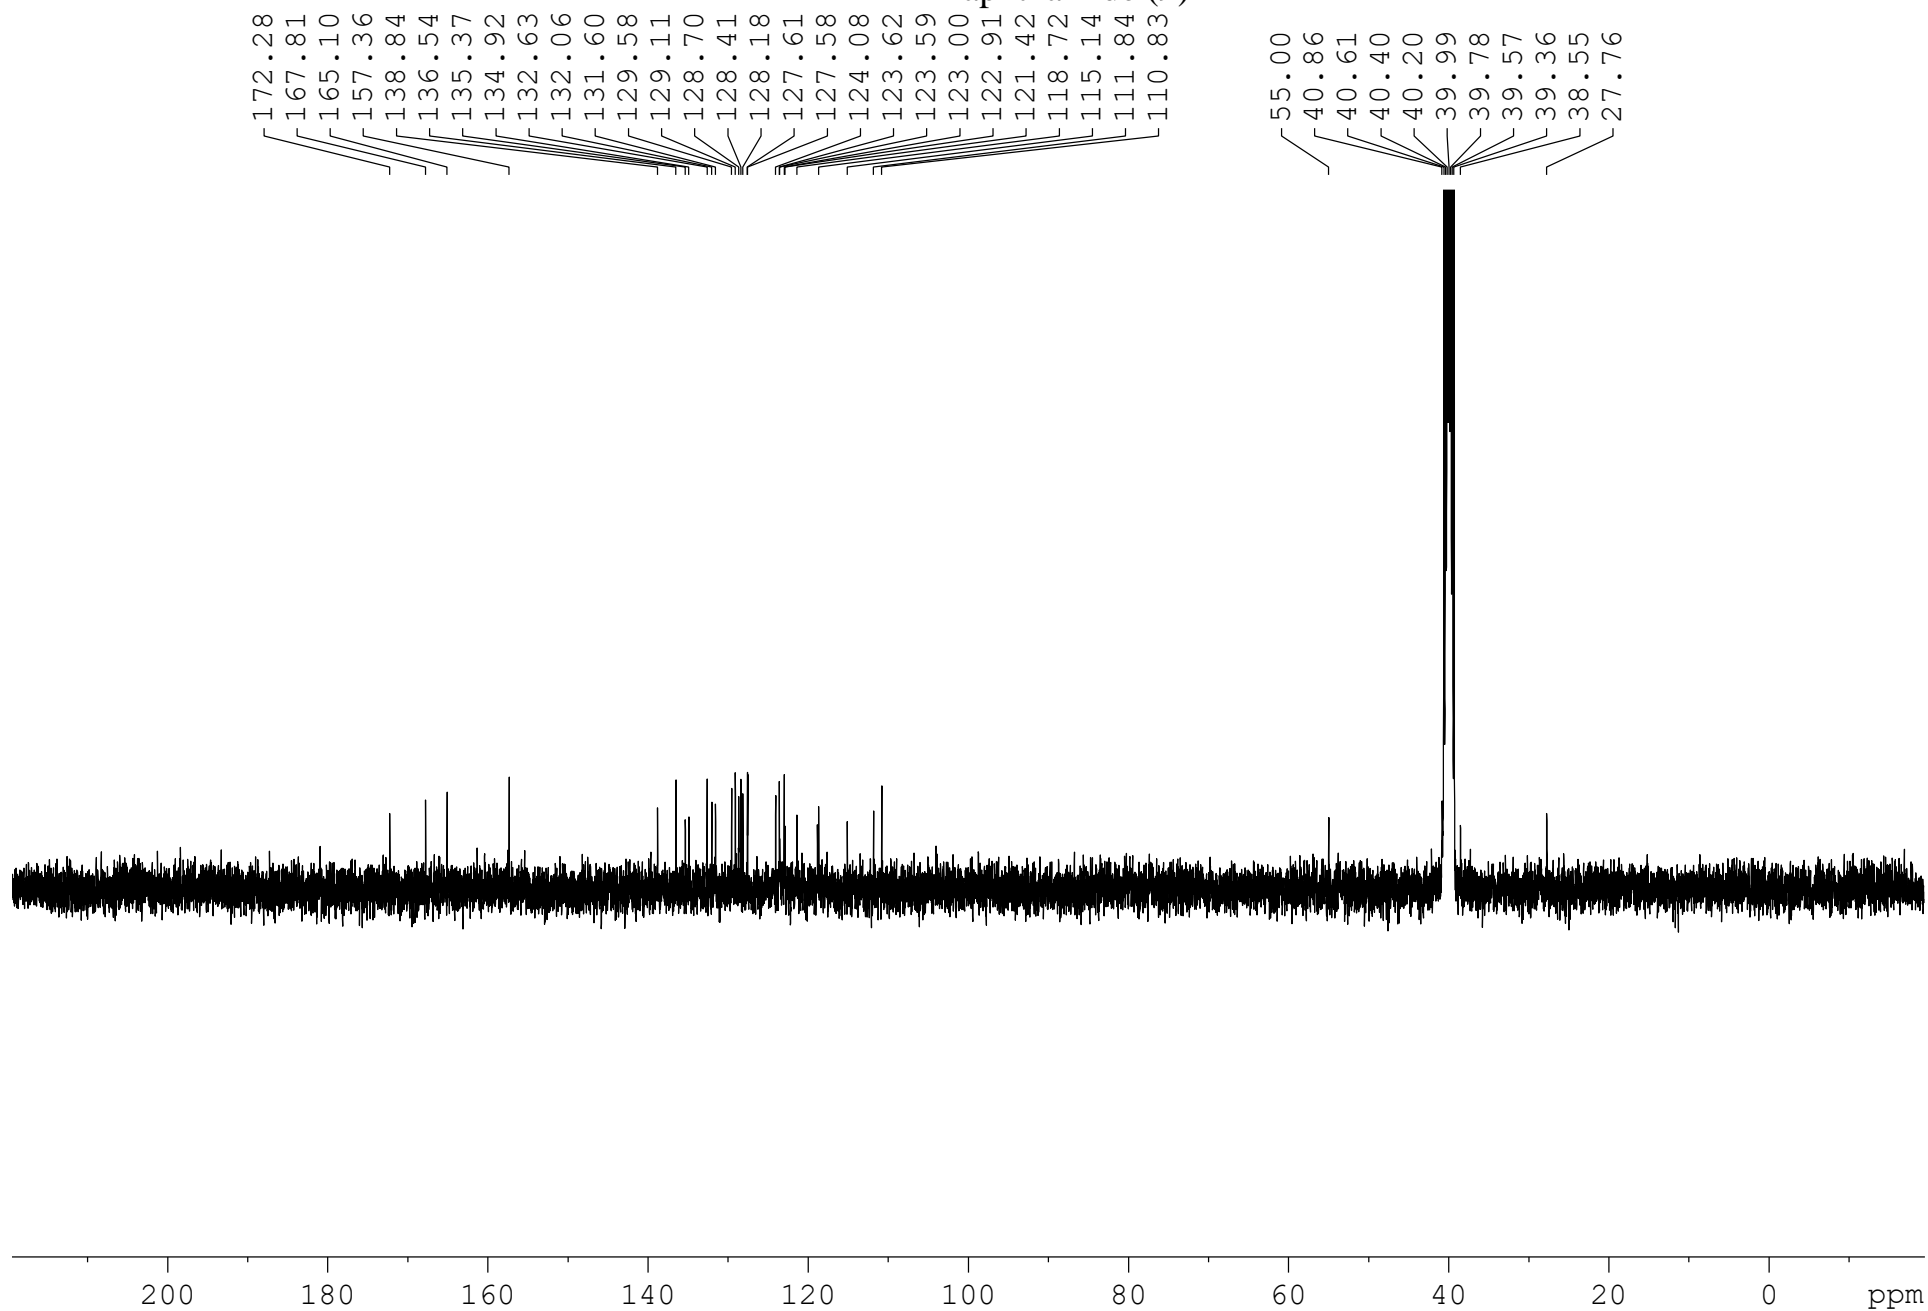

$^1\text{H}$  NMR spectra of (*S*)-*N*-(2-((1-((2-guanidinoethyl)amino)-3-(*1H*-indol-3-yl)-1-oxopropan-2-yl)carbamoyl)-4-methoxyphenyl)-2-naphthamide (**10**)

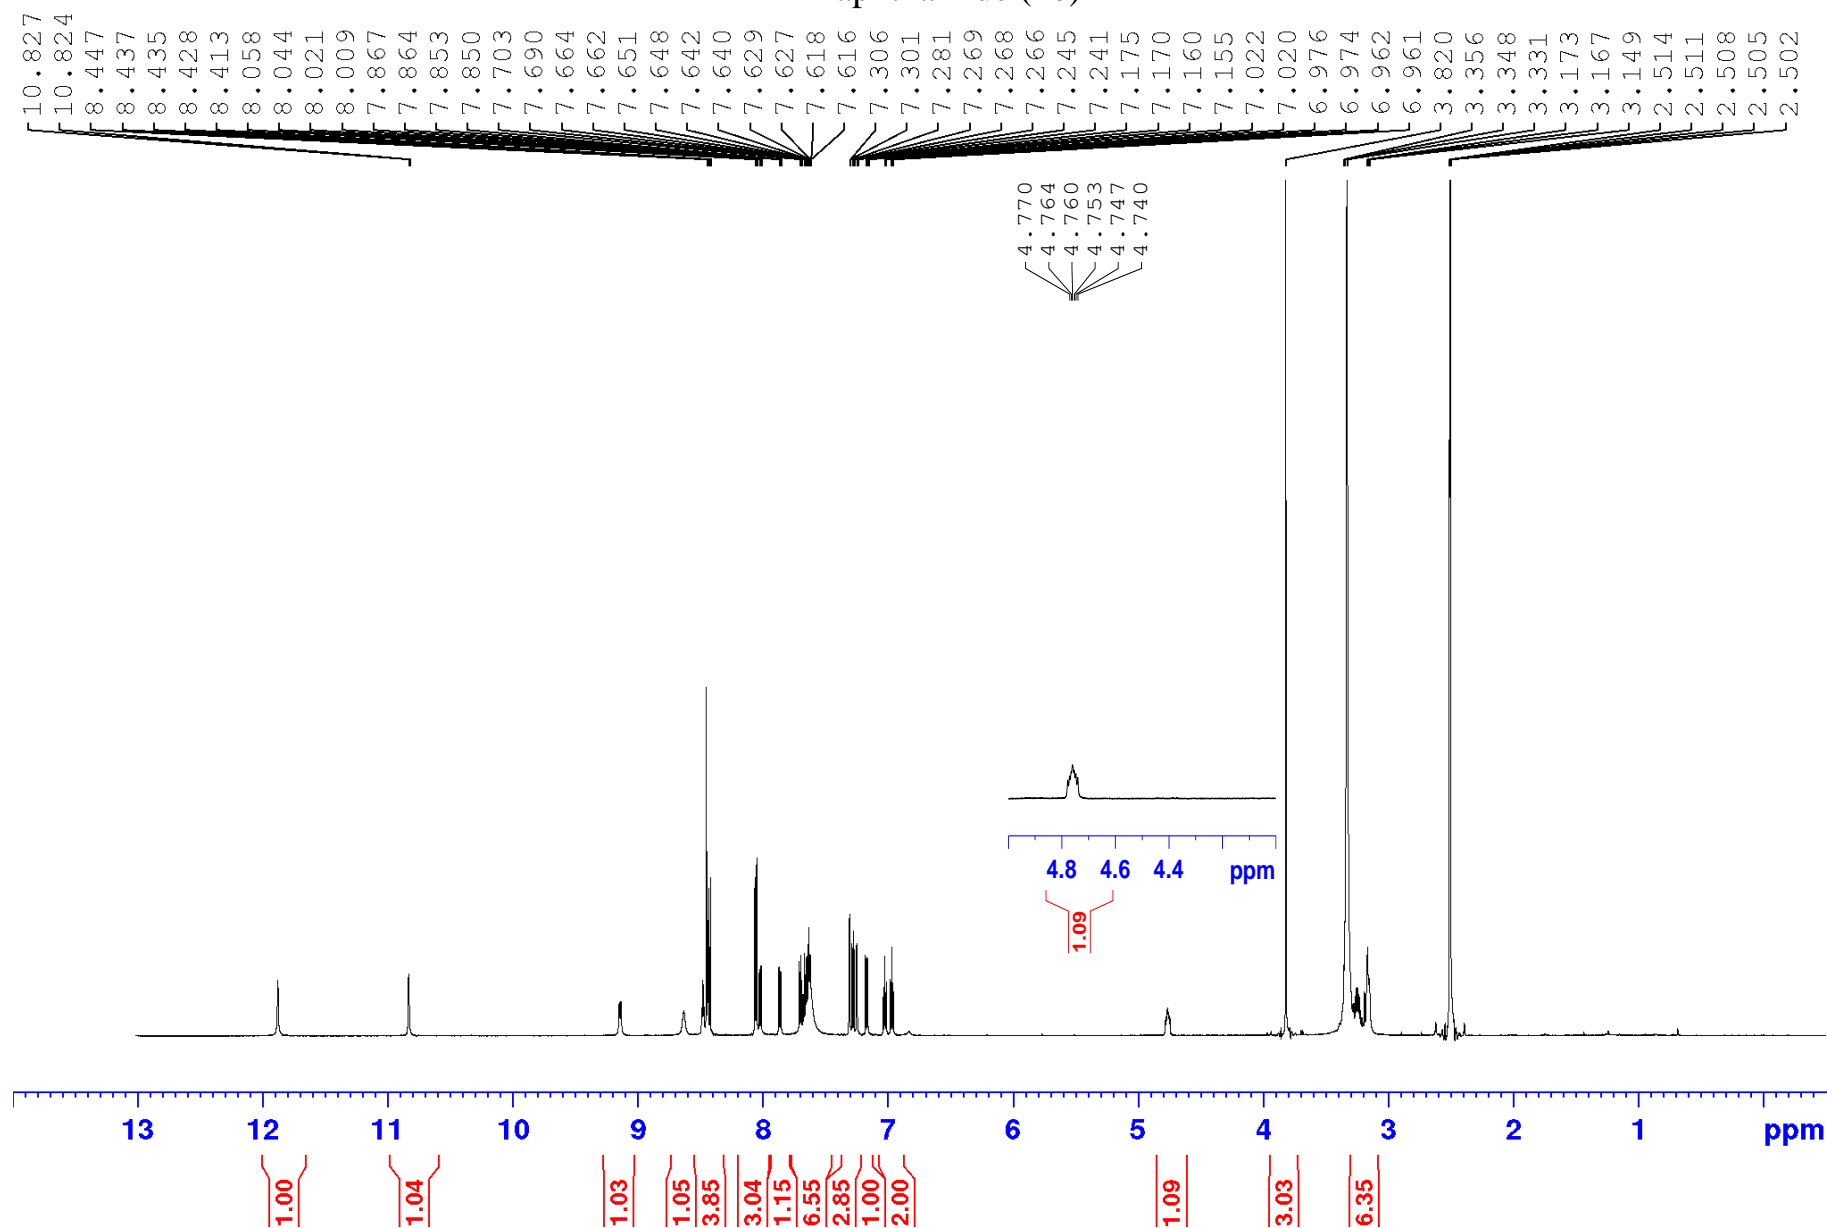

$^{13}\text{C}$  NMR spectra of (*S*)-*N*-(2-((1-((2-guanidinoethyl)amino)-3-(1*H*-indol-3-yl)-1-oxopropan-2-yl)carbamoyl)-4-methoxyphenyl)-2-naphthamide (**10**)

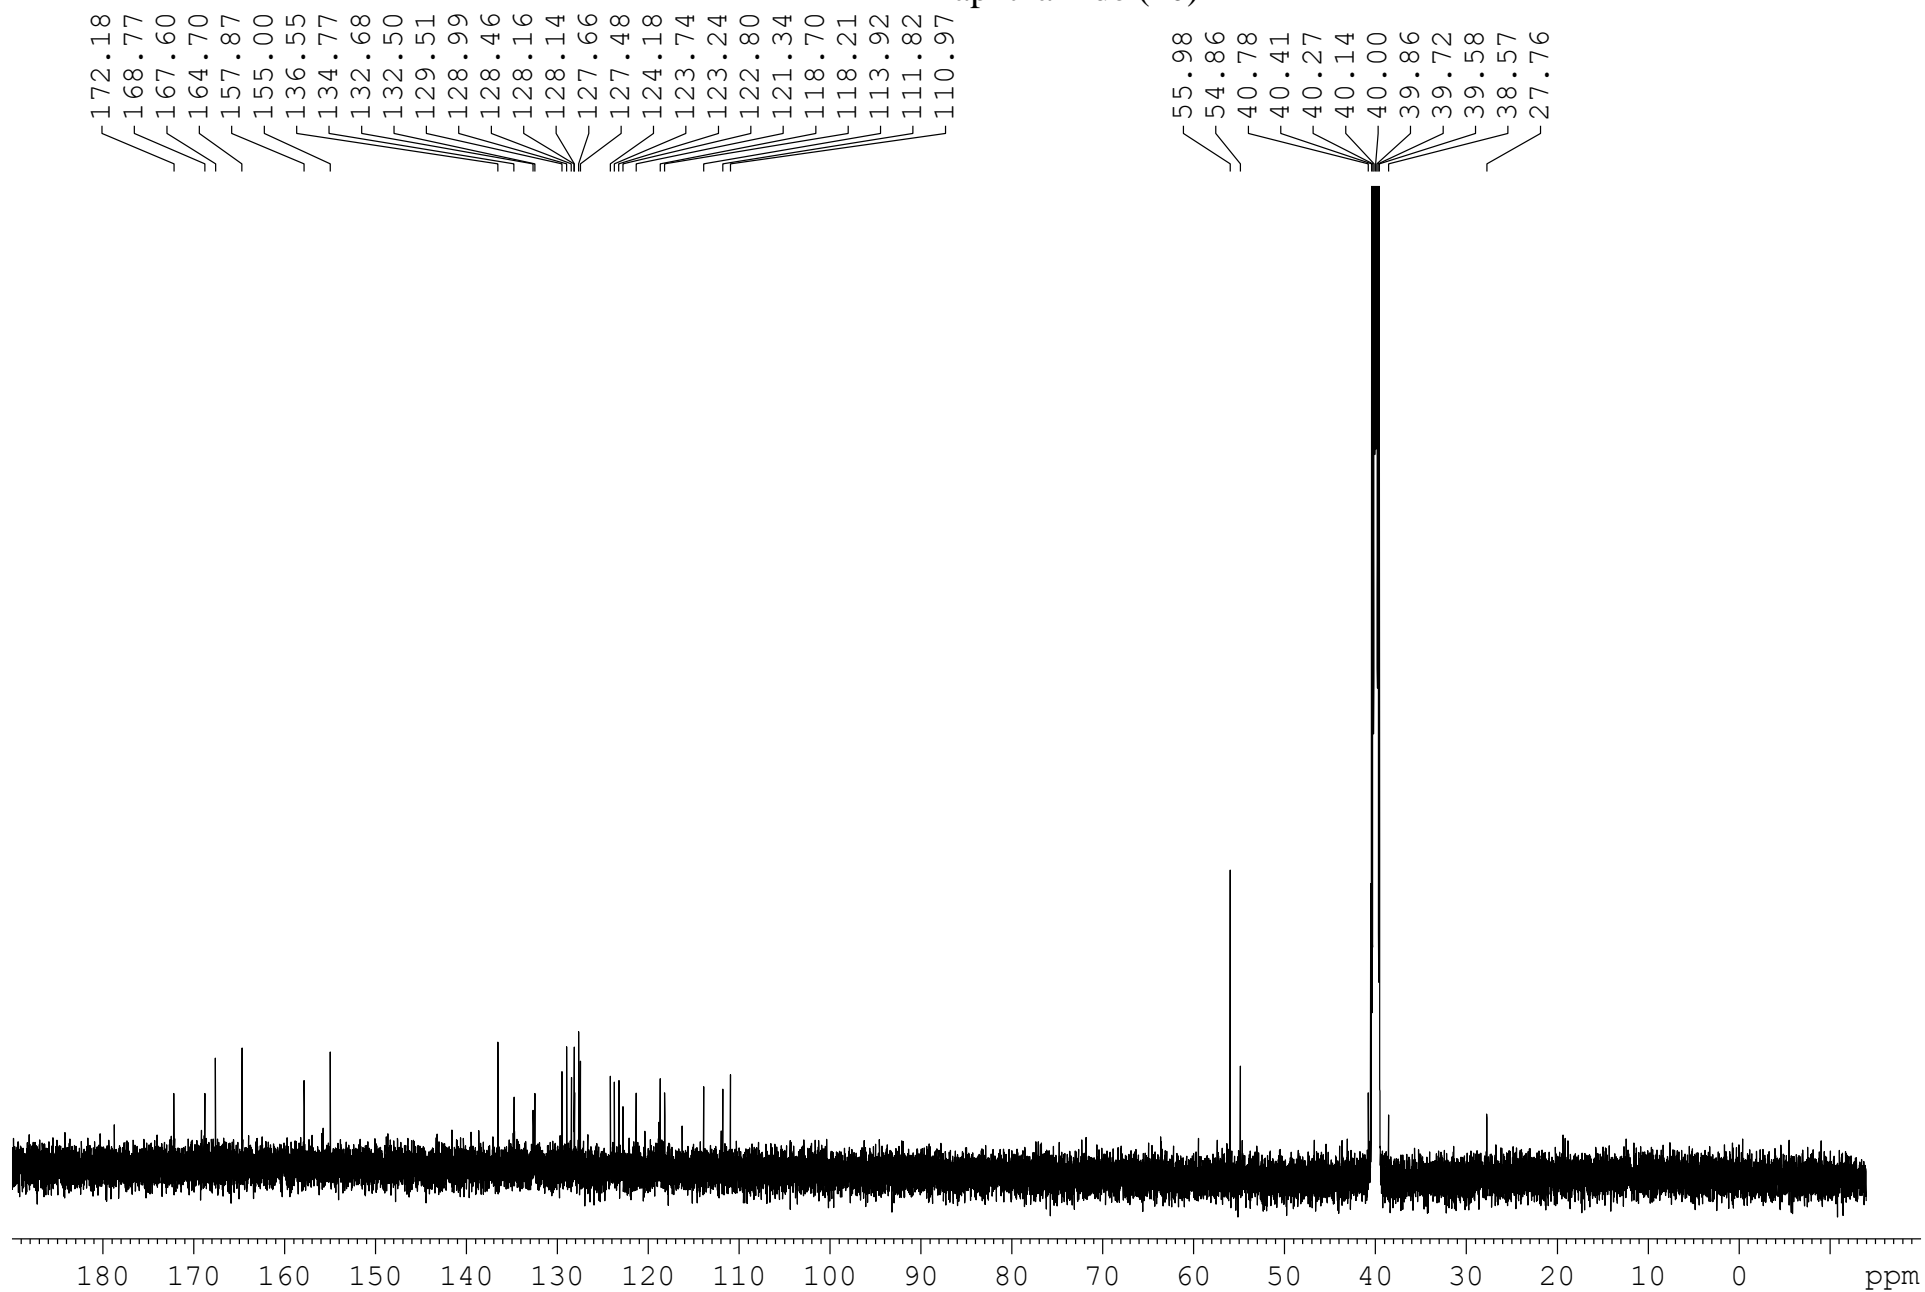

<sup>1</sup>H NMR of (*S*)-2-amino-*N*-(1-((2-aminoethyl)amino)-3-(1*H*-indol-3-yl)-1-oxopropan-2-yl)-5-(naphthalen-2-yl)benzamide (**11**)

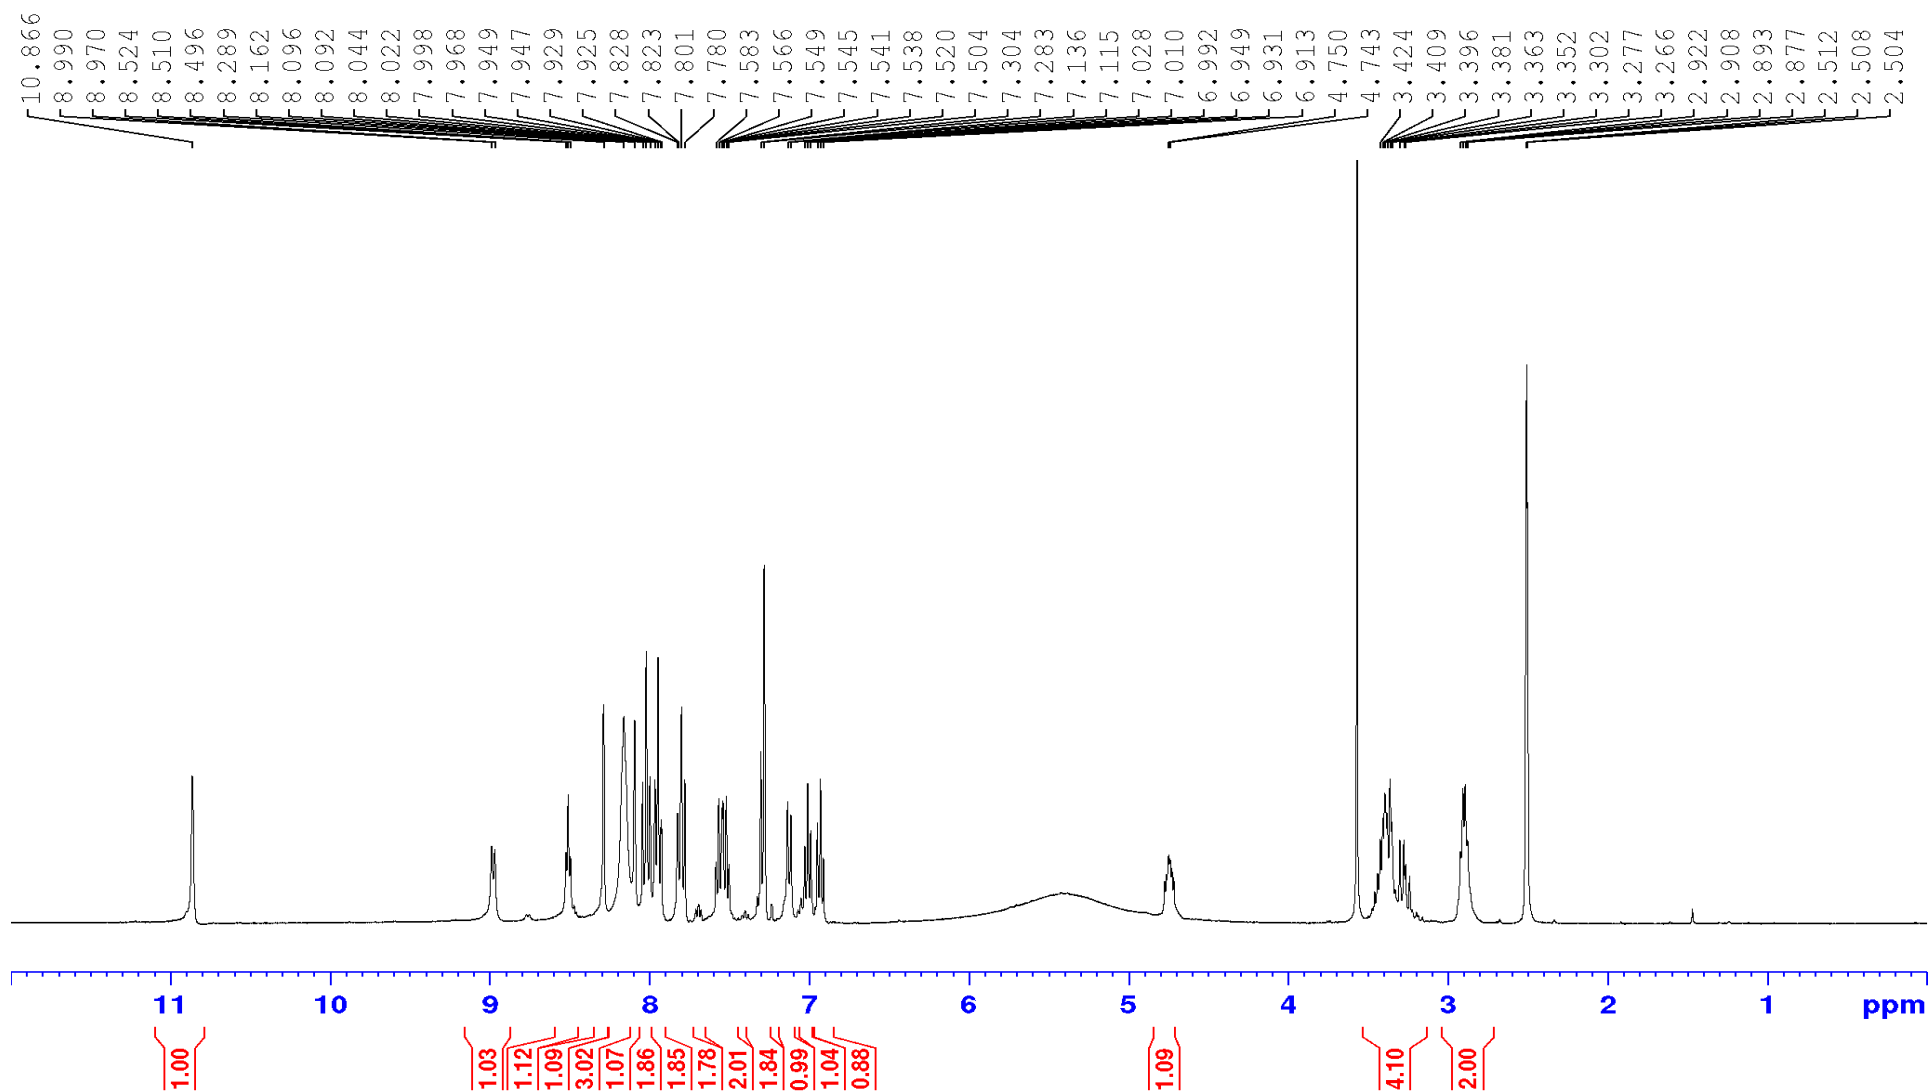



$^{13}\text{C}$  NMR of (*S*)-2-amino-*N*-(1-((2-aminoethyl)amino)-3-(1*H*-indol-3-yl)-1-oxopropan-2-yl)-5-(naphthalen-2-yl)benzamide (**11**)

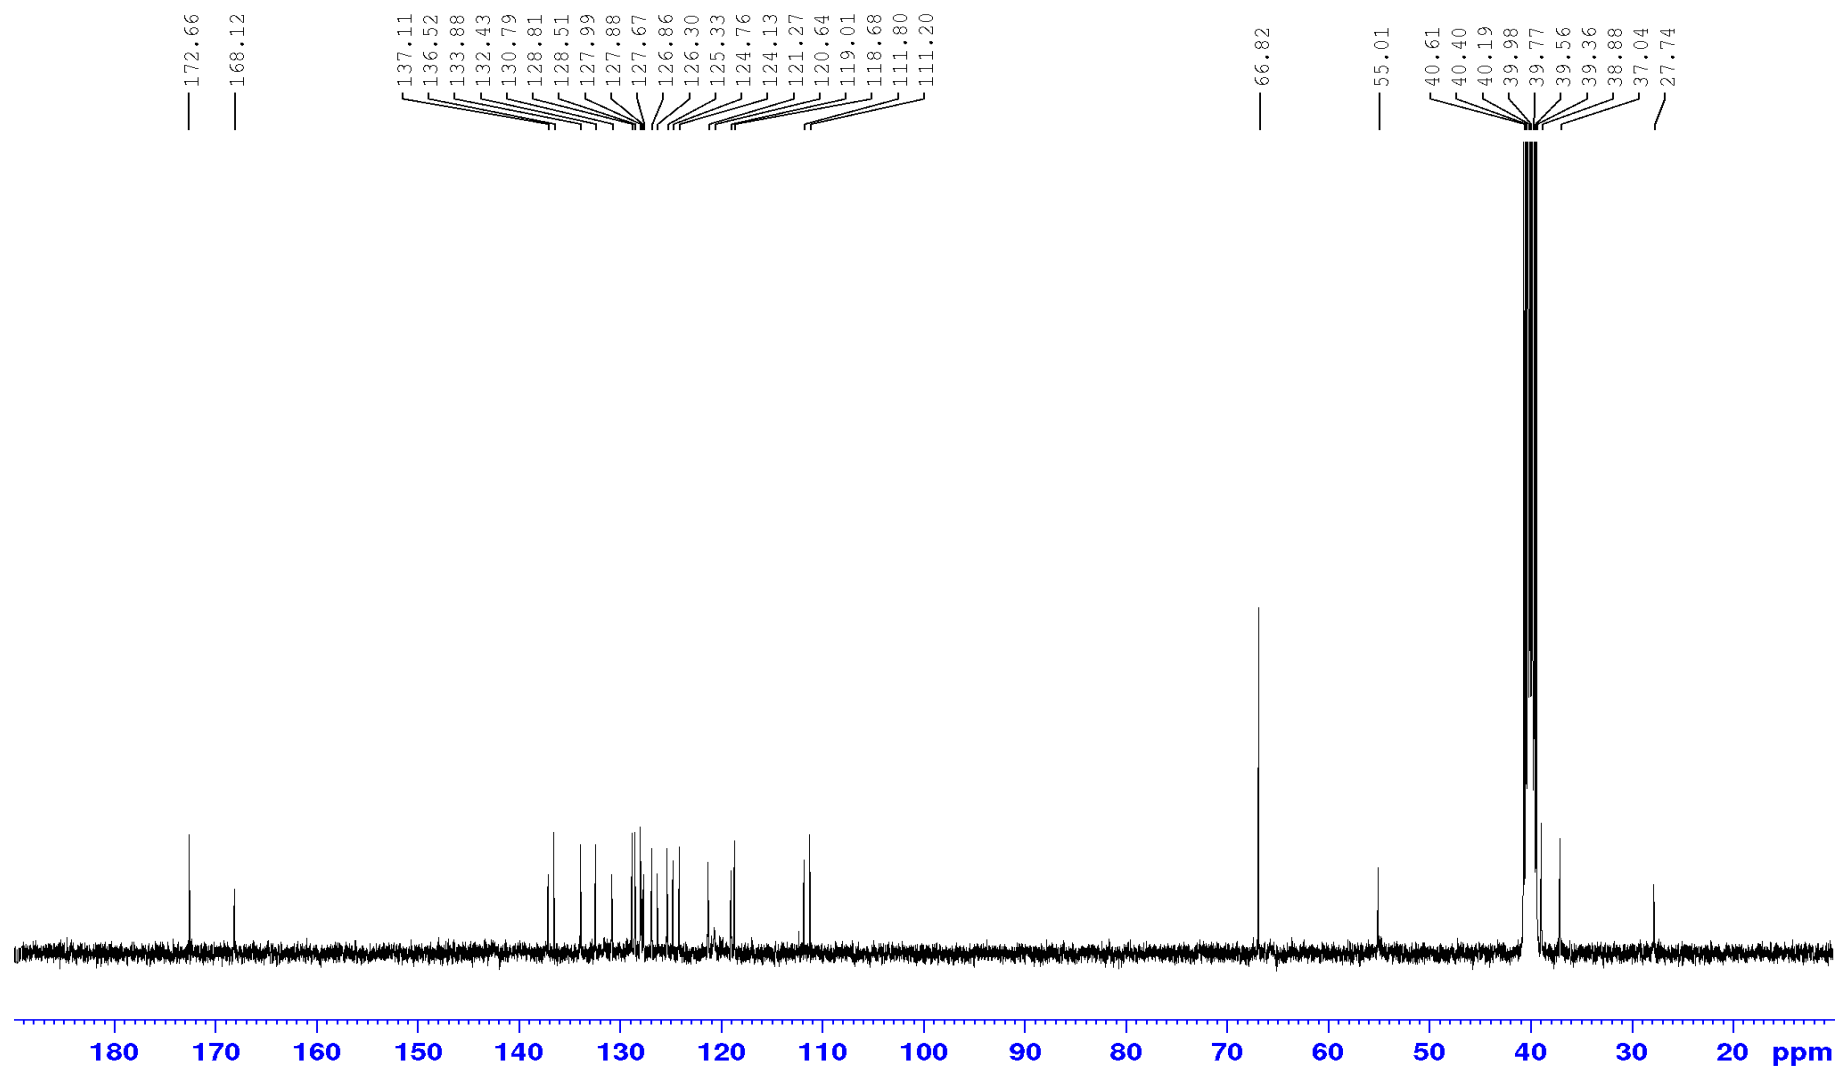

<sup>1</sup>H NMR of (S)-3-((1-((2-ammonioethyl)amino)-3-(1*H*-indol-3-yl)-1-oxopropan-2-yl)carbamoyl)-[1,1':4',1''-terphenyl]-4-aminium  
(12)

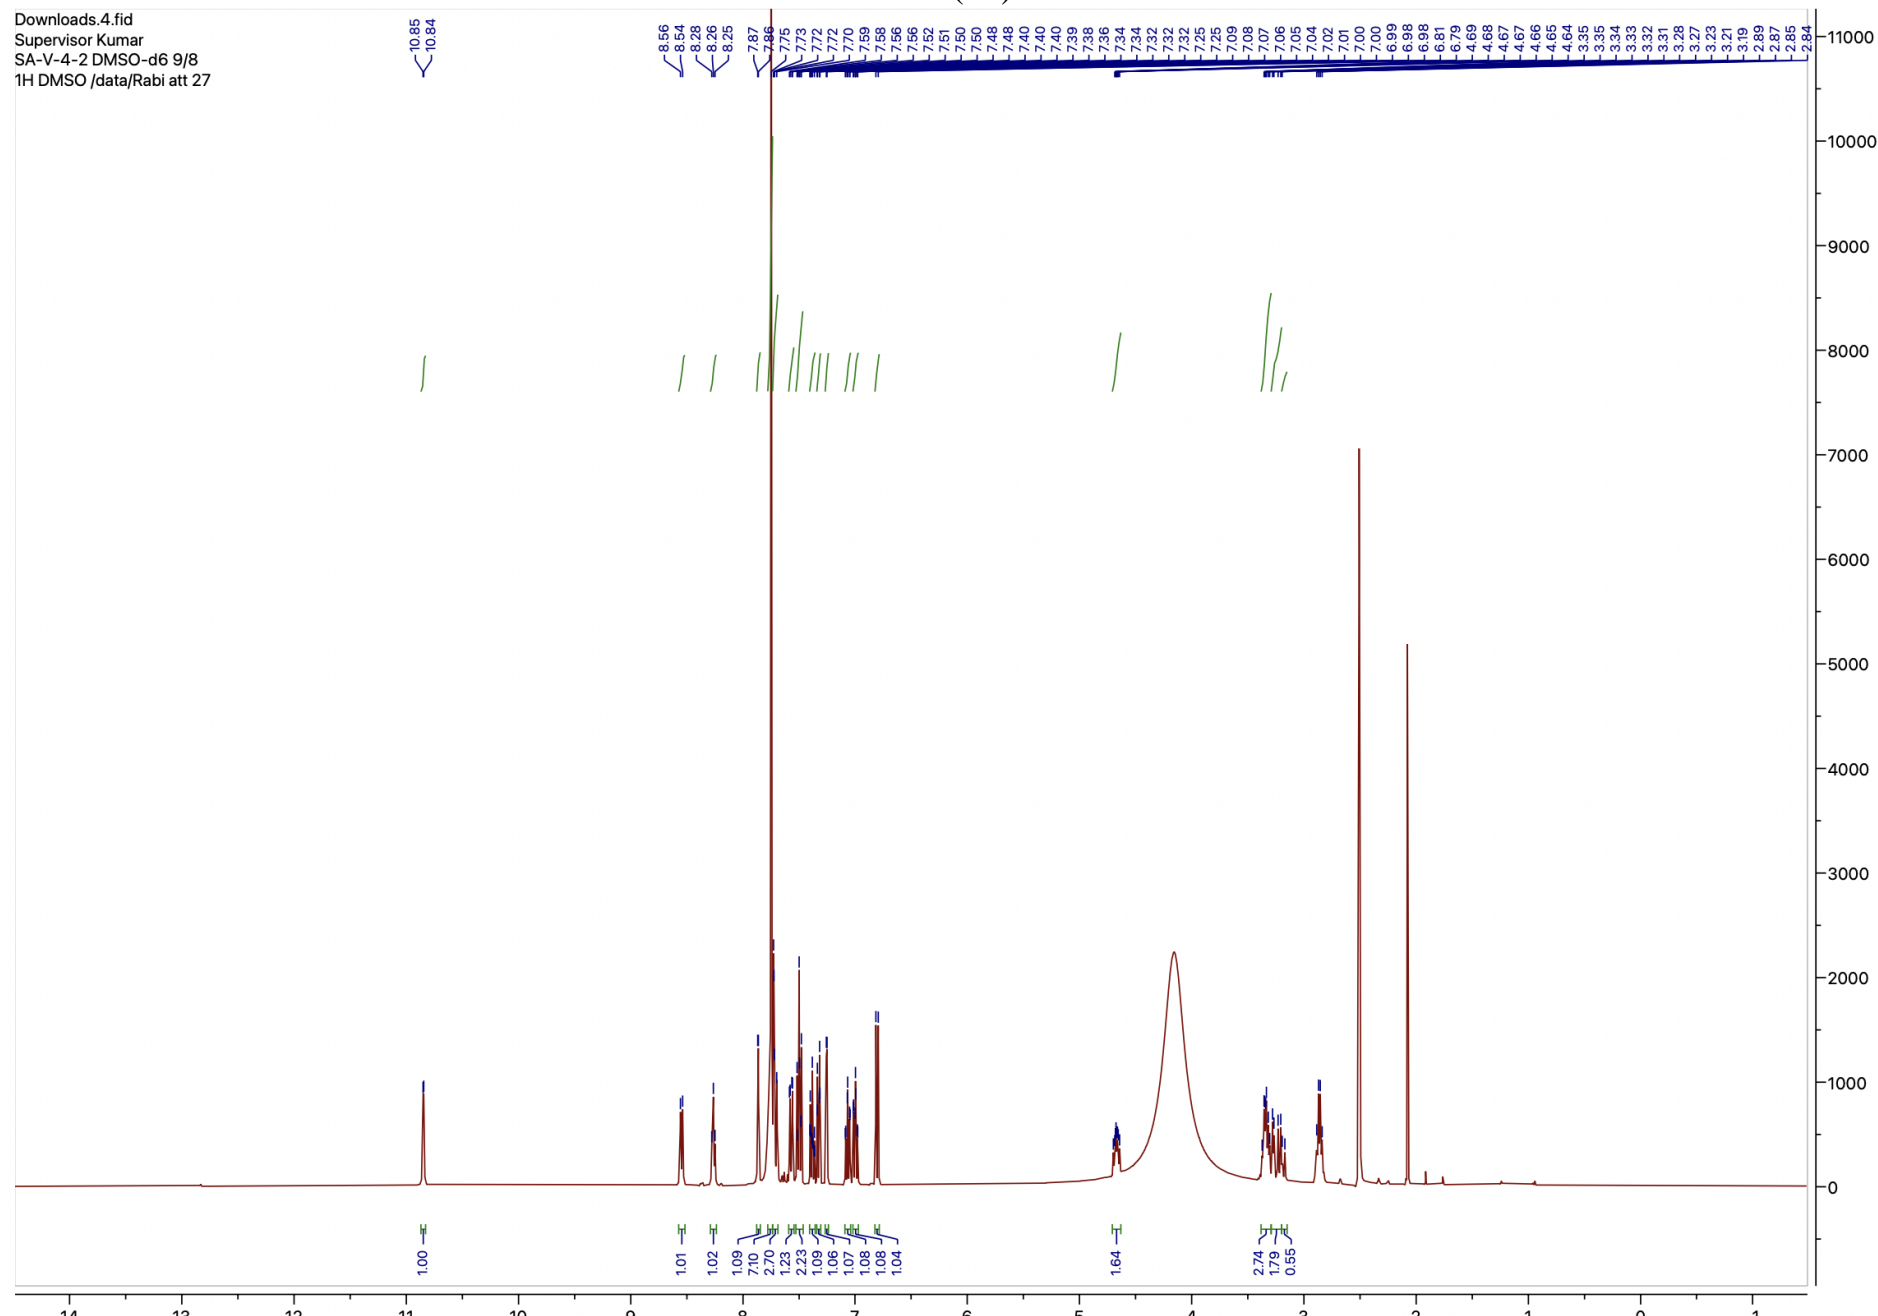

$^{13}\text{C}$  NMR of (*S*)-3-((1-((2-ammonioethyl)amino)-3-(1*H*-indol-3-yl)-1-oxopropan-2-yl)carbamoyl)-[1,1':4',1''-terphenyl]-4-aminium  
(12)

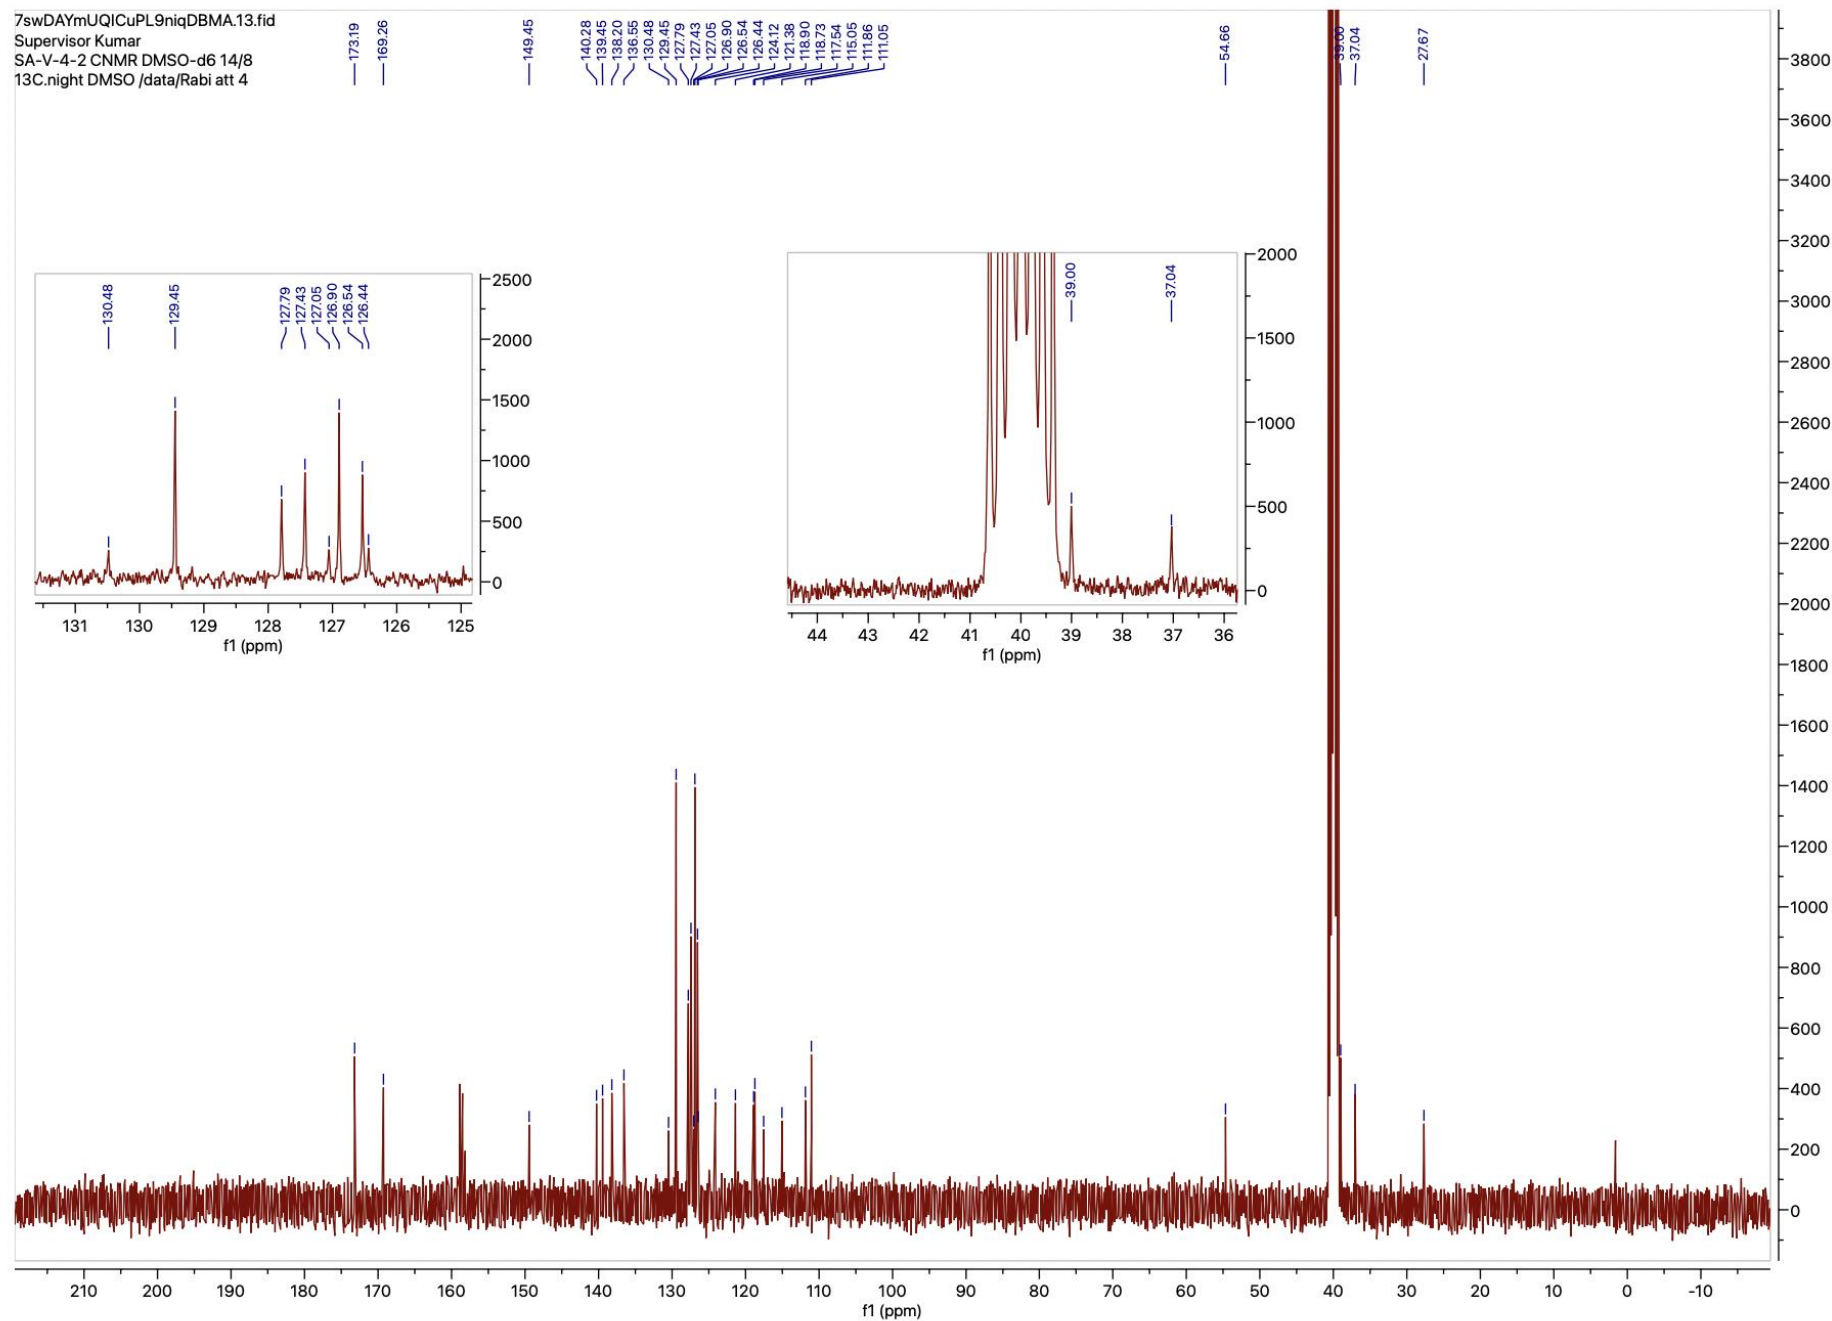

<sup>1</sup>H NMR of (S)-2-((1-((2-ammonioethyl)amino)-3-(1*H*-indol-3-yl)-1-oxopropan-2-yl)carbamoyl)-4-(2,4-dimethoxypyrimidin-5-yl)benzenaminium (**13**)

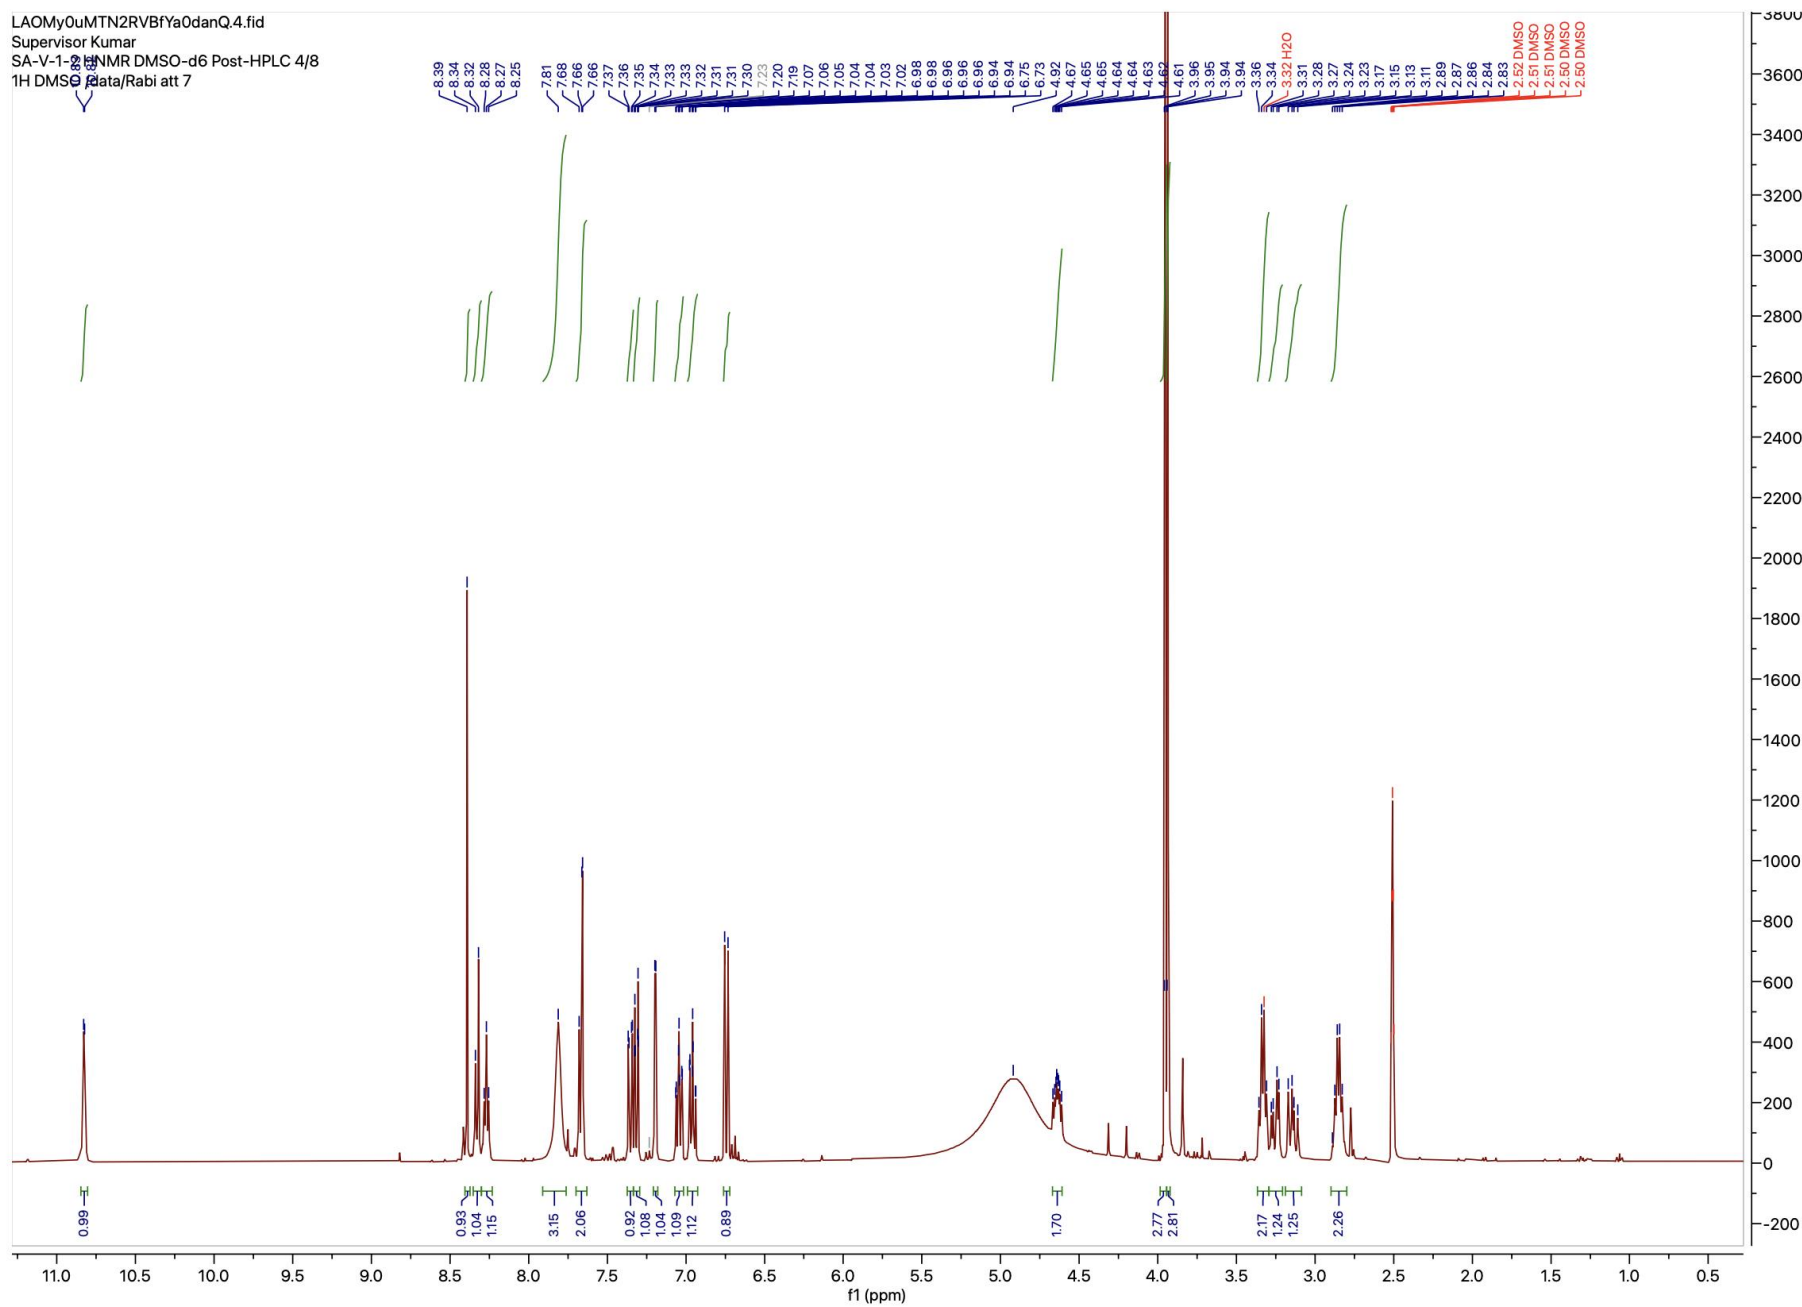

<sup>13</sup>C NMR of (*S*)-2-((1-((2-ammonioethyl)amino)-3-(1*H*-indol-3-yl)-1-oxopropan-2-yl)carbamoyl)-4-(2,4-dimethoxypyrimidin-5-yl)benzenaminium (**13**)

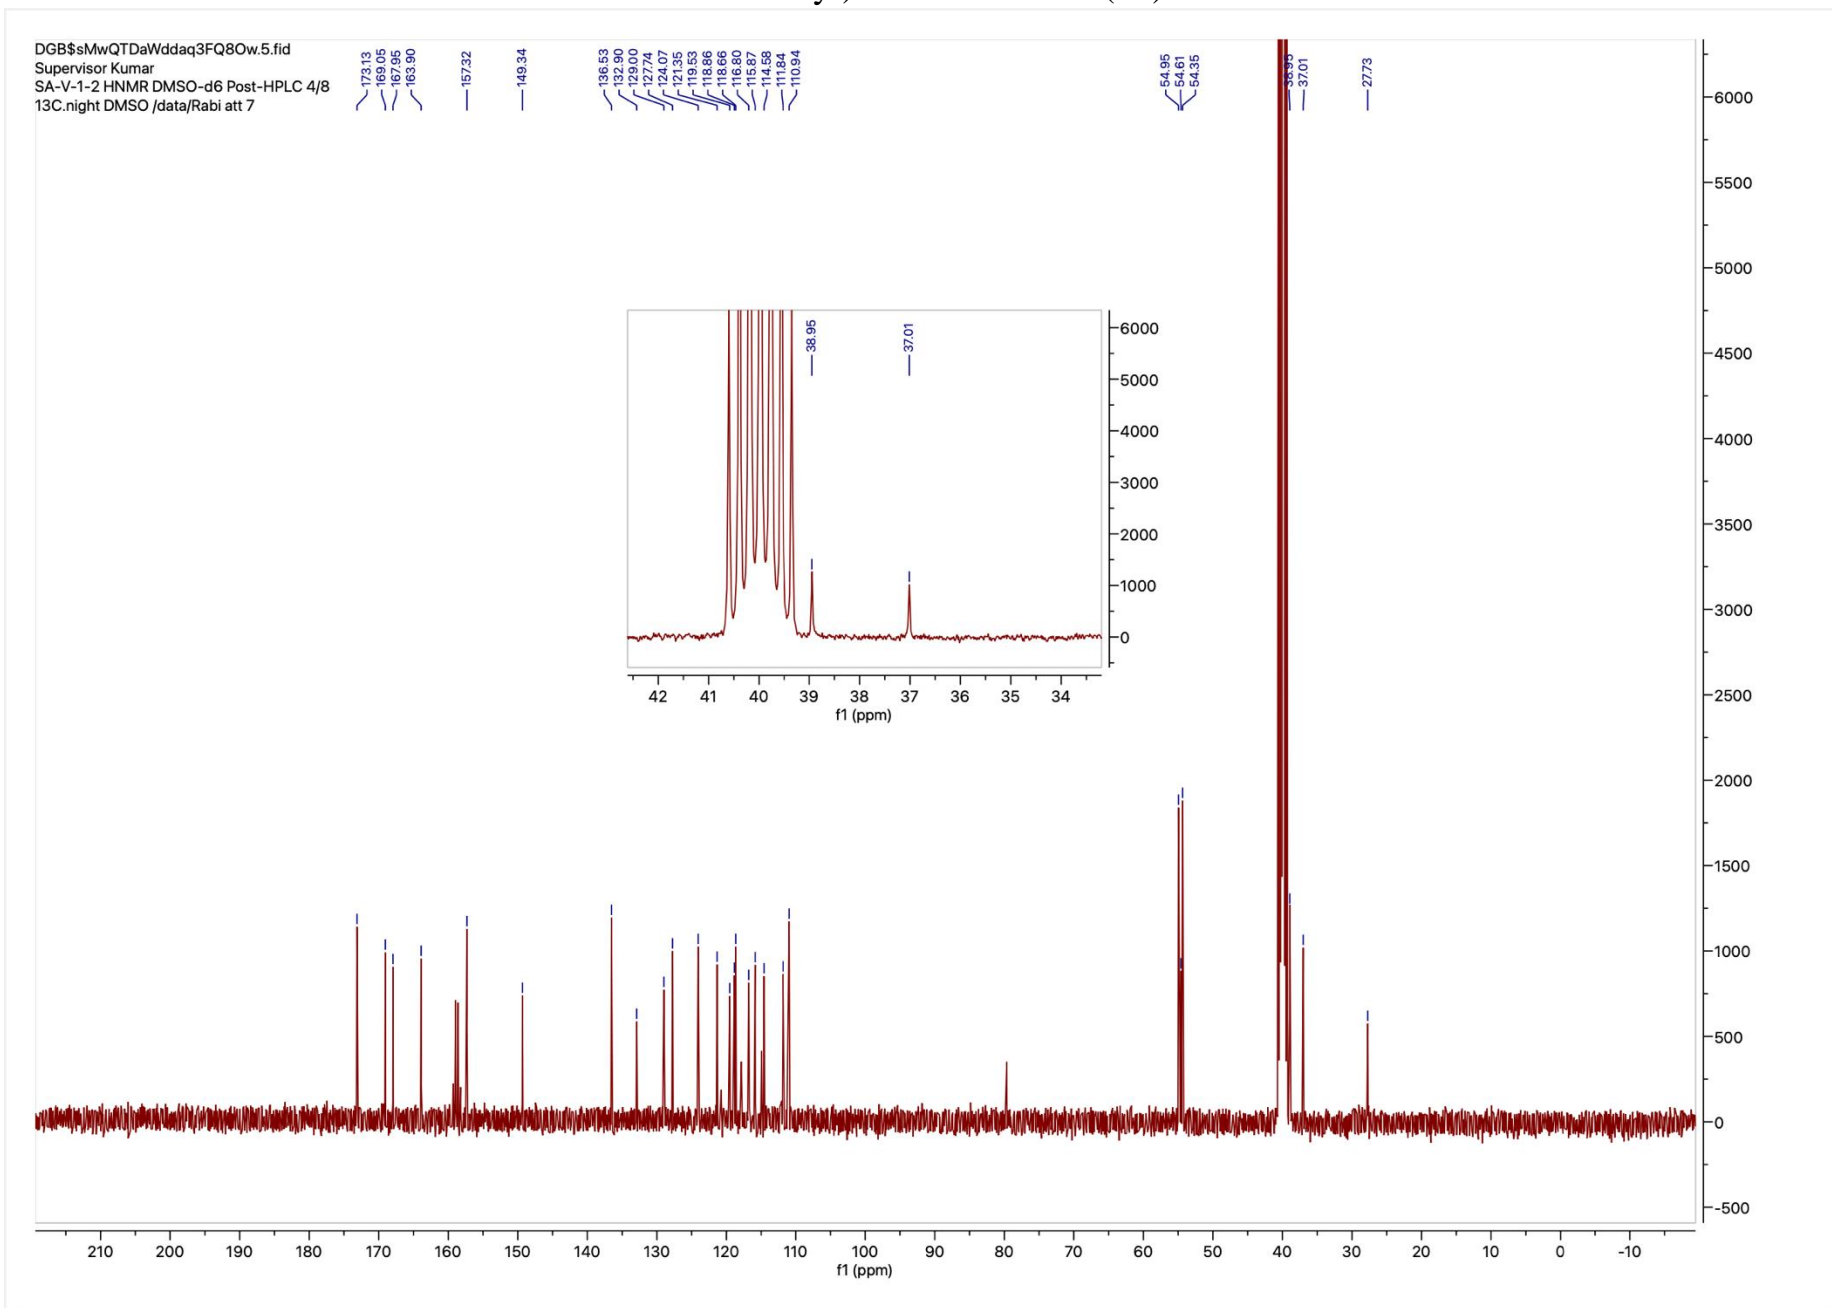

<sup>1</sup>H NMR of (*S*)-3-((1-((2-ammonioethyl)amino)-3-(1*H*-indol-3-yl)-1-oxopropan-2-yl)carbamoyl)-[1,1':2',1''-terphenyl]-4-aminium (**14**)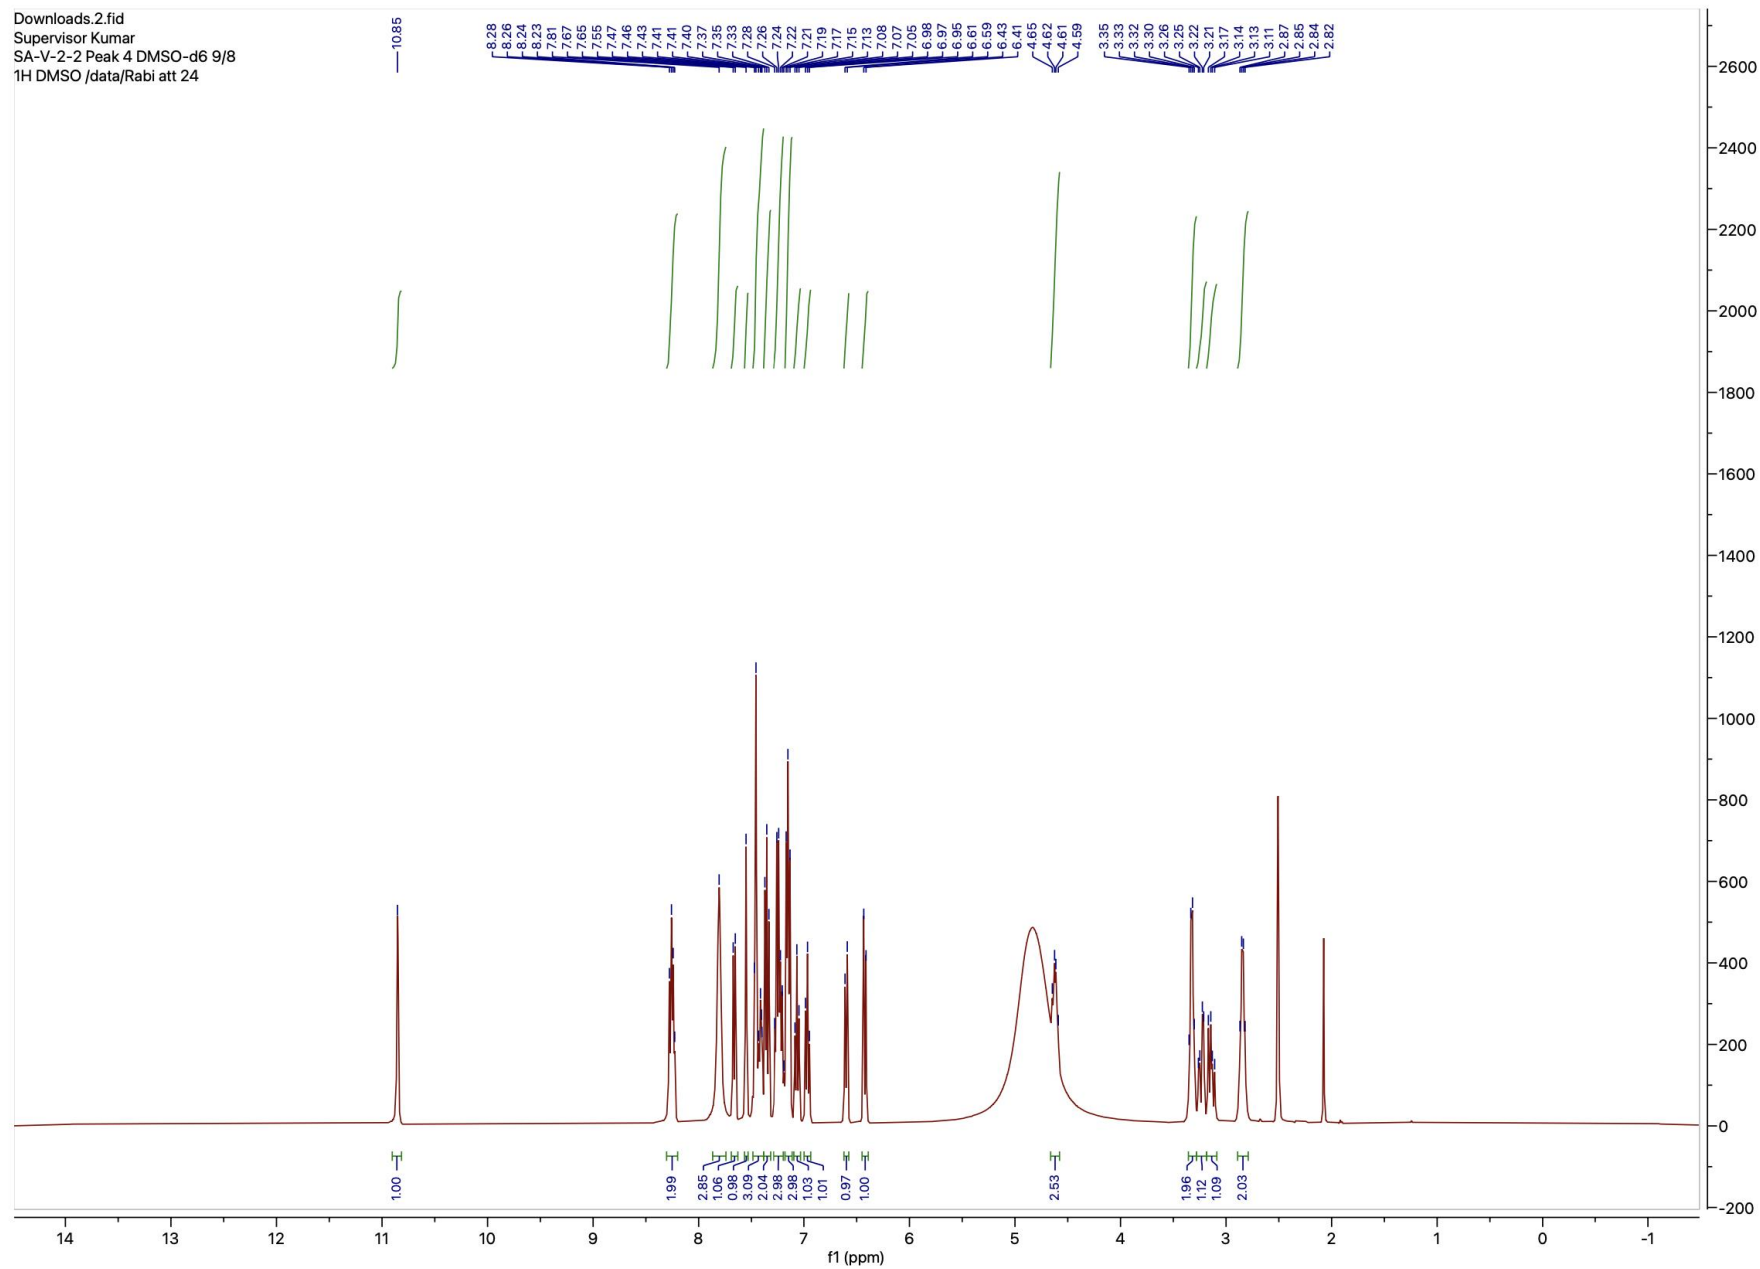

<sup>13</sup>C NMR of (*S*)-3-((1-((2-ammonioethyl)amino)-3-(1*H*-indol-3-yl)-1-oxopropan-2-yl)carbamoyl)-[1,1':2',1''-terphenyl]-4-aminium  
(**14**)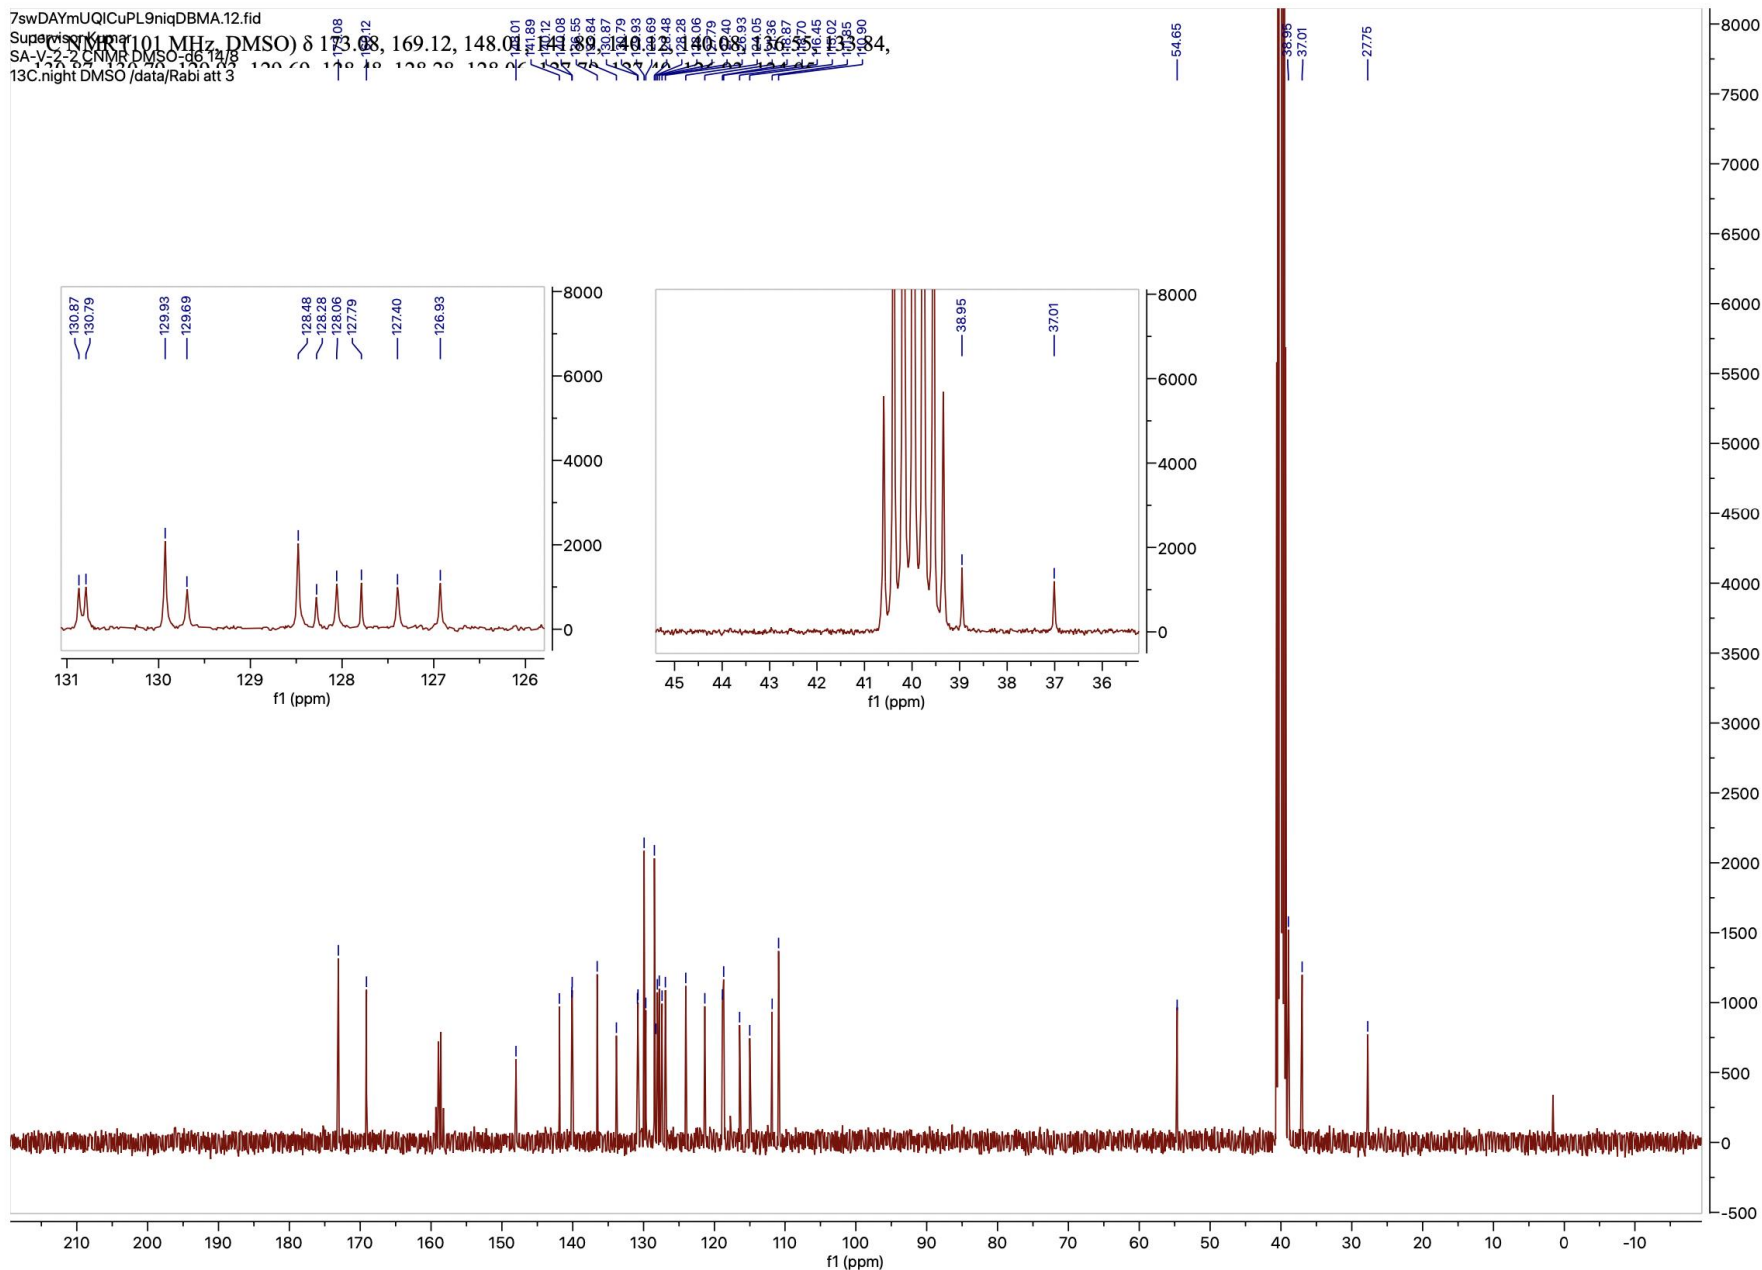

<sup>1</sup>H NMR of *N*-(4-bromo-2-(((*S*)-1-((2-((*S*)-2,6-diaminohexanamido)ethyl)amino)-3-(1*H*-indol-3-yl)-1-oxopropan-2-yl)carbamoyl)phenyl)-2-naphthamide (**15**)

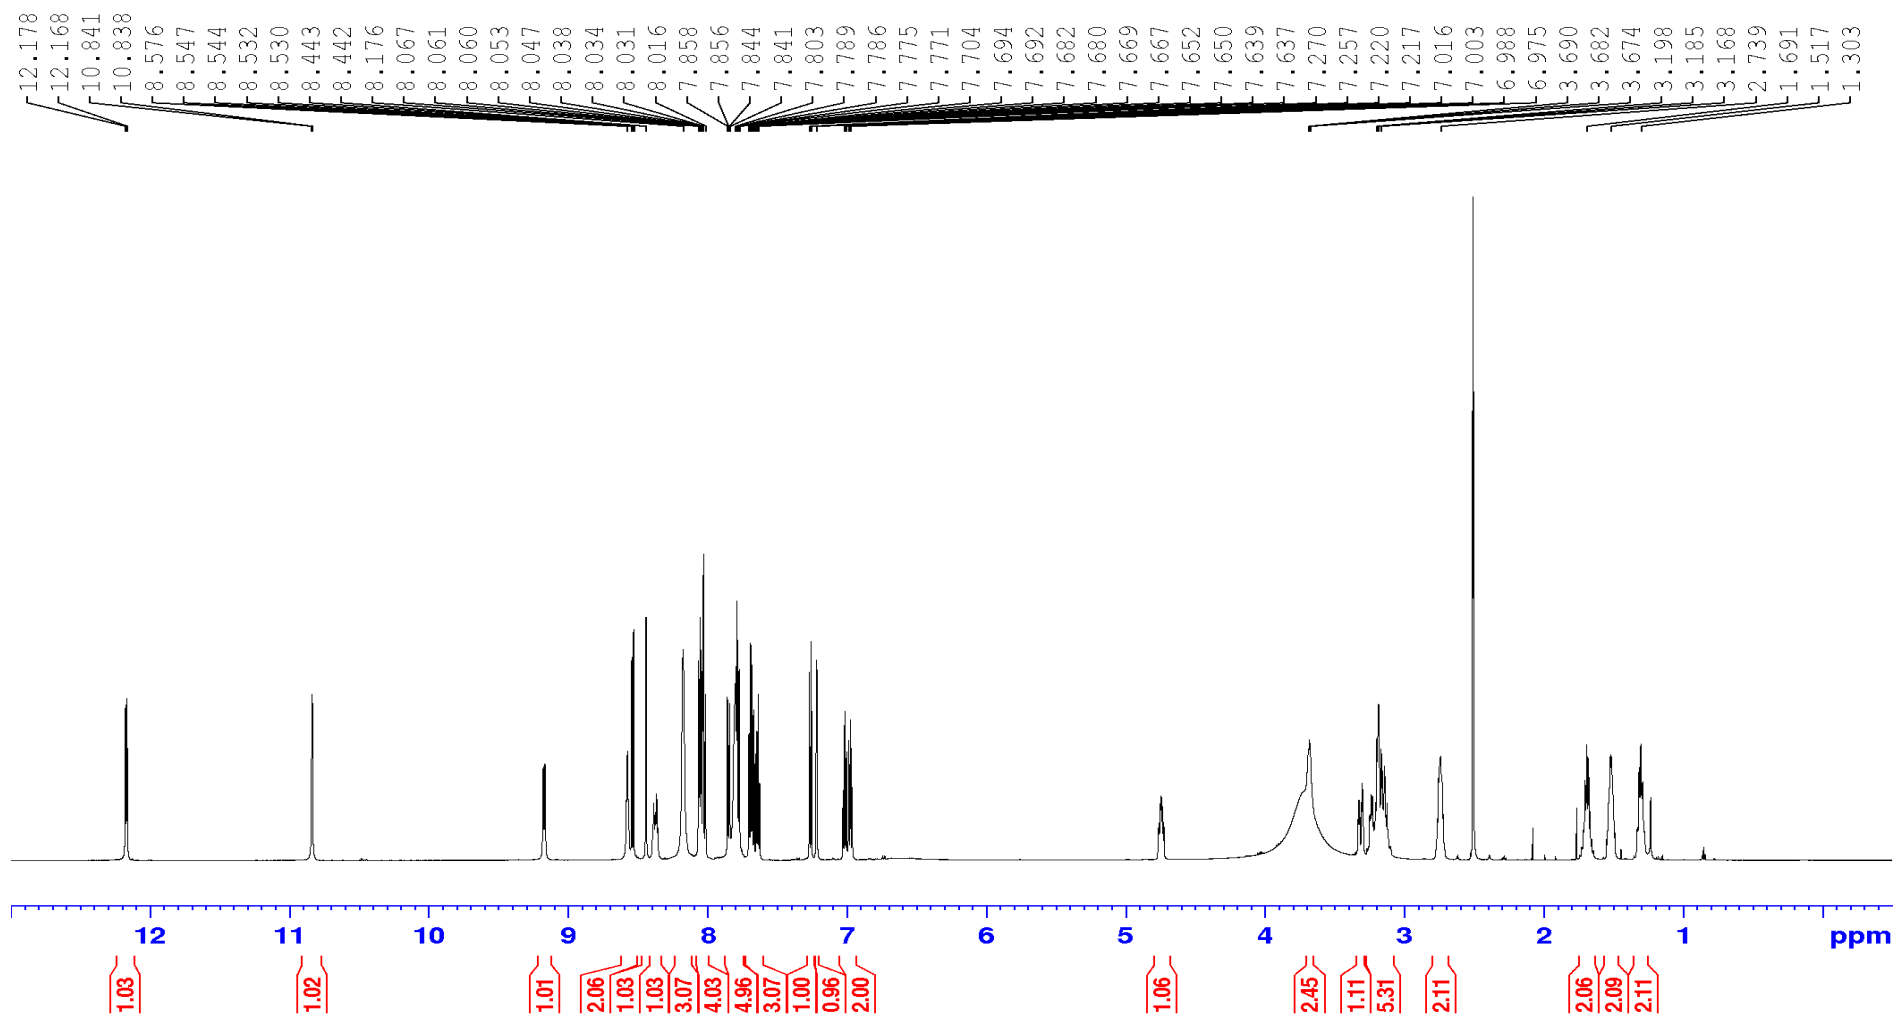



$^{13}\text{C}$  NMR of *N*-(4-bromo-2-(((*S*)-1-((2-((*S*)-2,6-diaminohexanamido)ethyl)amino)-3-(1*H*-indol-3-yl)-1-oxopropan-2-yl)carbamoyl)phenyl)-2-naphthamide (**15**)

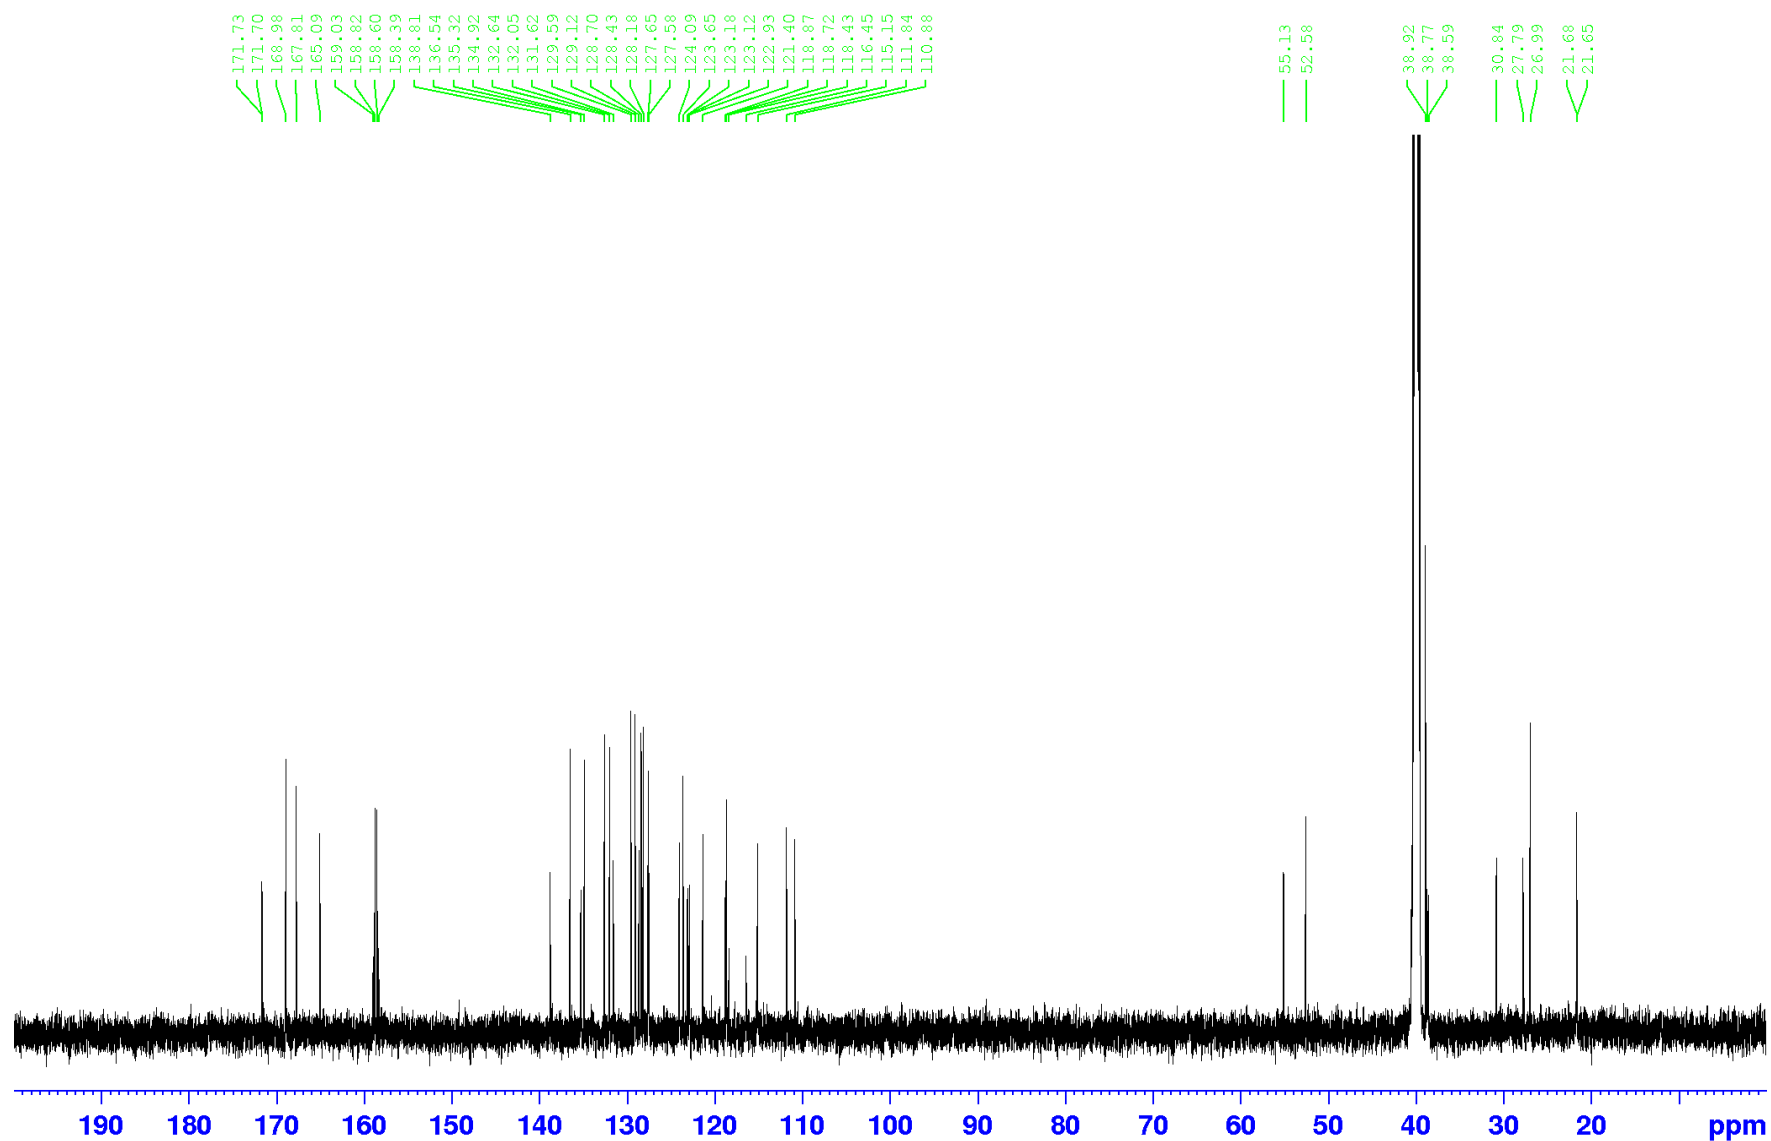

<sup>1</sup>HNMR of *N*-(4-bromo-2-(((*S*)-1-((2-((*S*)-2,6-diaminohexanamido)ethyl)amino)-3-(1*H*-indol-3-yl)-1-oxopropan-2-yl)carbamoyl)phenyl)-[1,1'-biphenyl]-3-carboxamide (**16**)

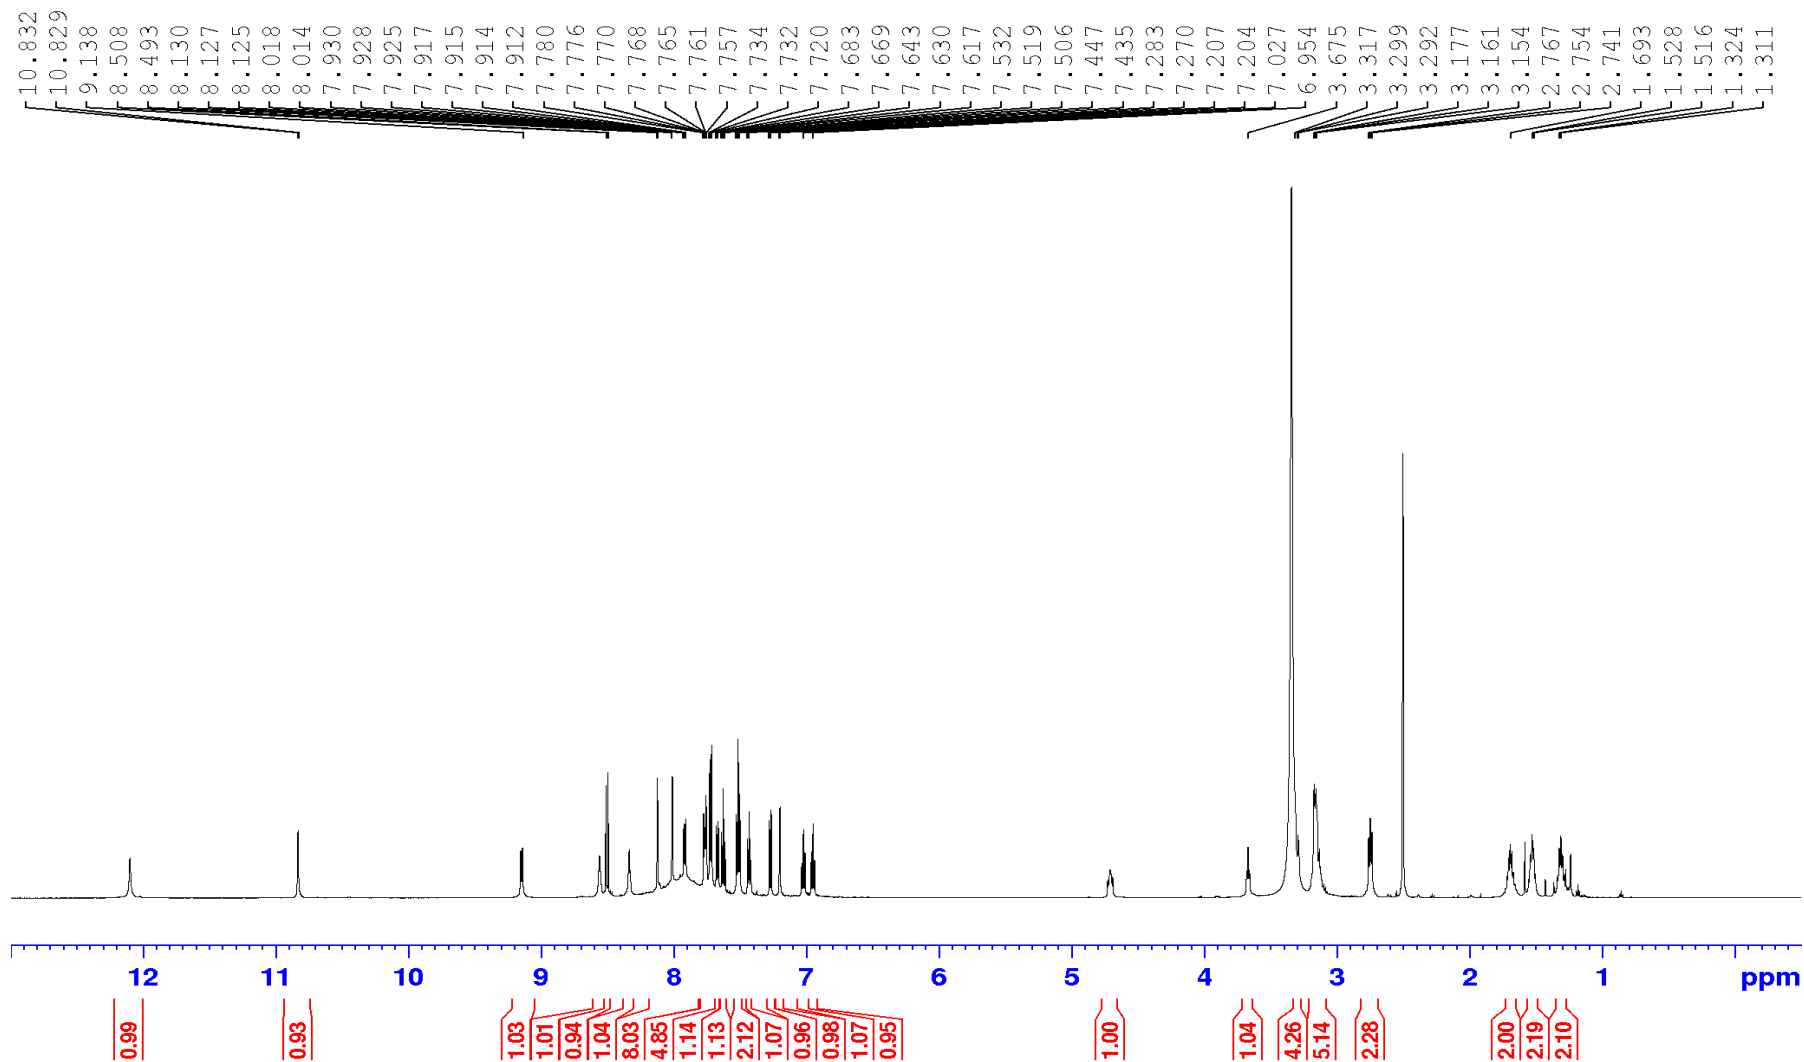

$^{13}\text{C}$  NMR of *N*-(4-bromo-2-(((*S*)-1-((2-((*S*)-2,6-diaminohexanamido)ethyl)amino)-3-(1*H*-indol-3-yl)-1-oxopropan-2-yl)carbamoyl)phenyl)-[1,1'-biphenyl]-3-carboxamide (**16**)

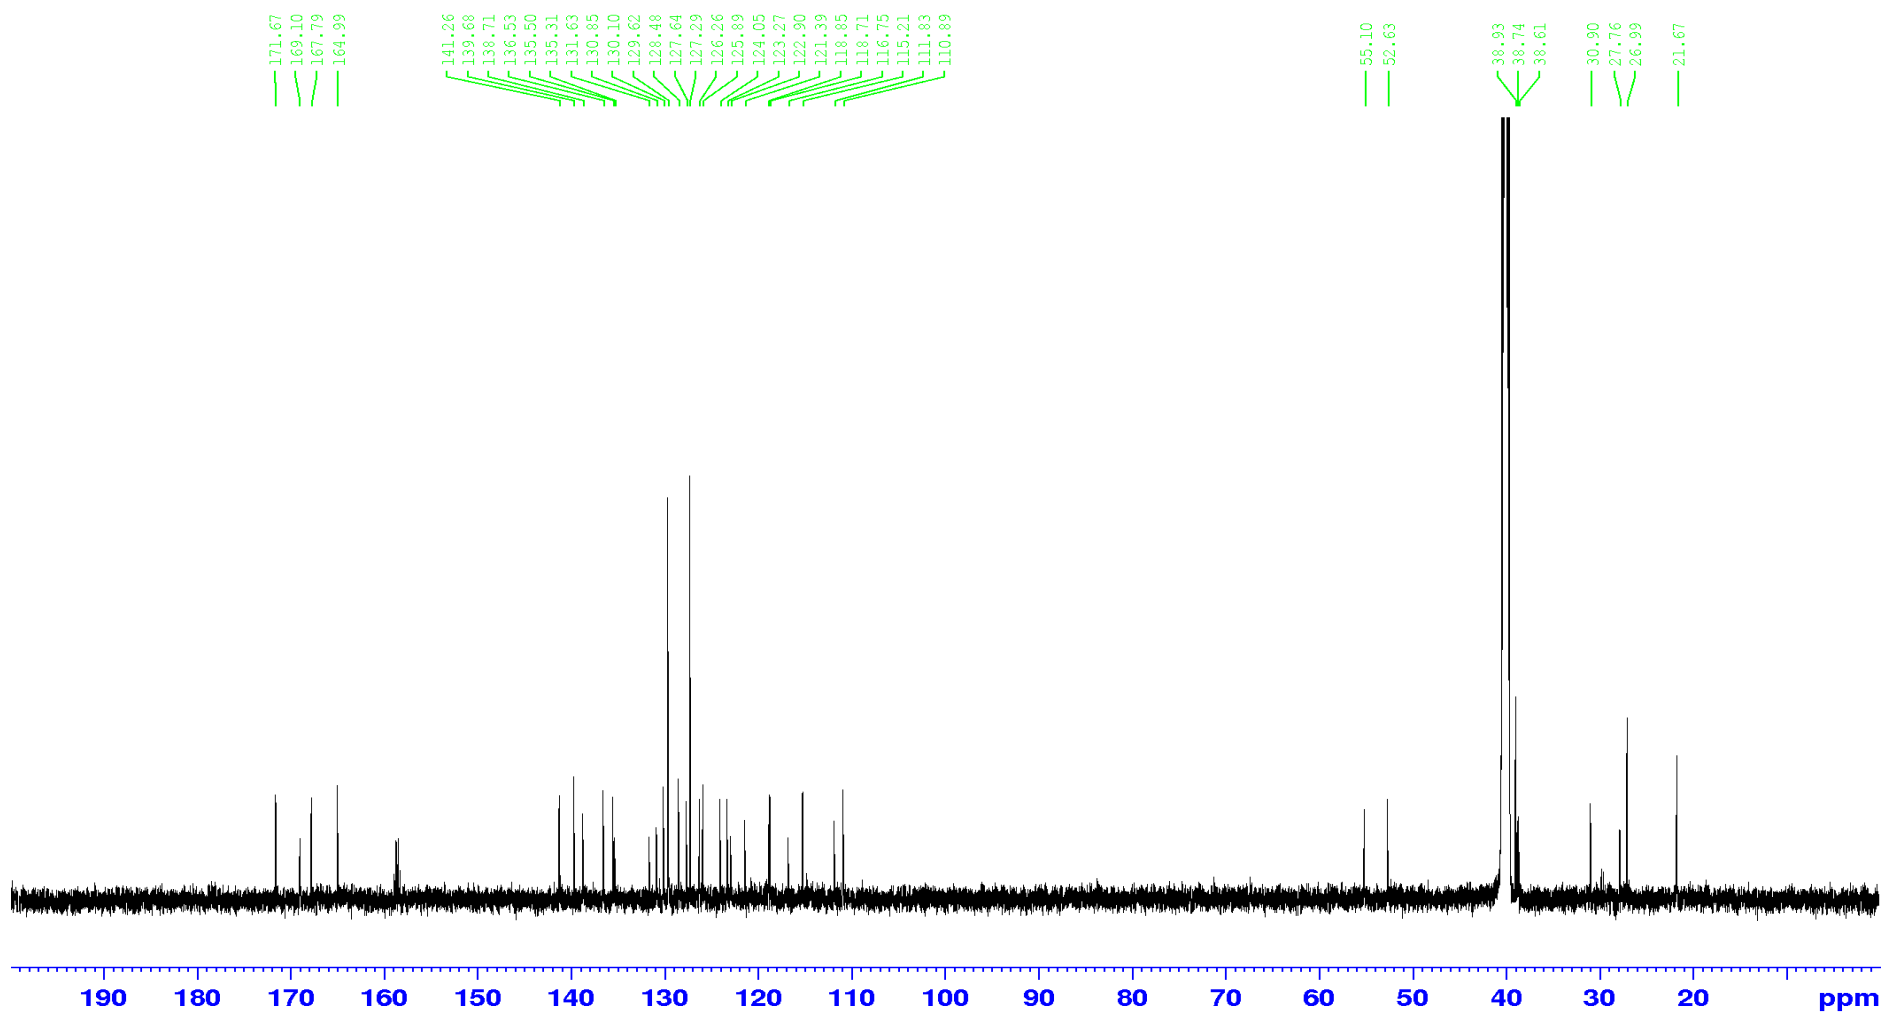

<sup>1</sup>H NMR of *N*-(4-bromo-2-(((*S*)-1-((2-((*S*)-2,6-diaminohexanamido)ethyl)amino)-3-(1*H*-indol-3-yl)-1-oxopropan-2-yl)carbamoyl)phenyl)-[1,1'-biphenyl]-4-carboxamide (**17**)

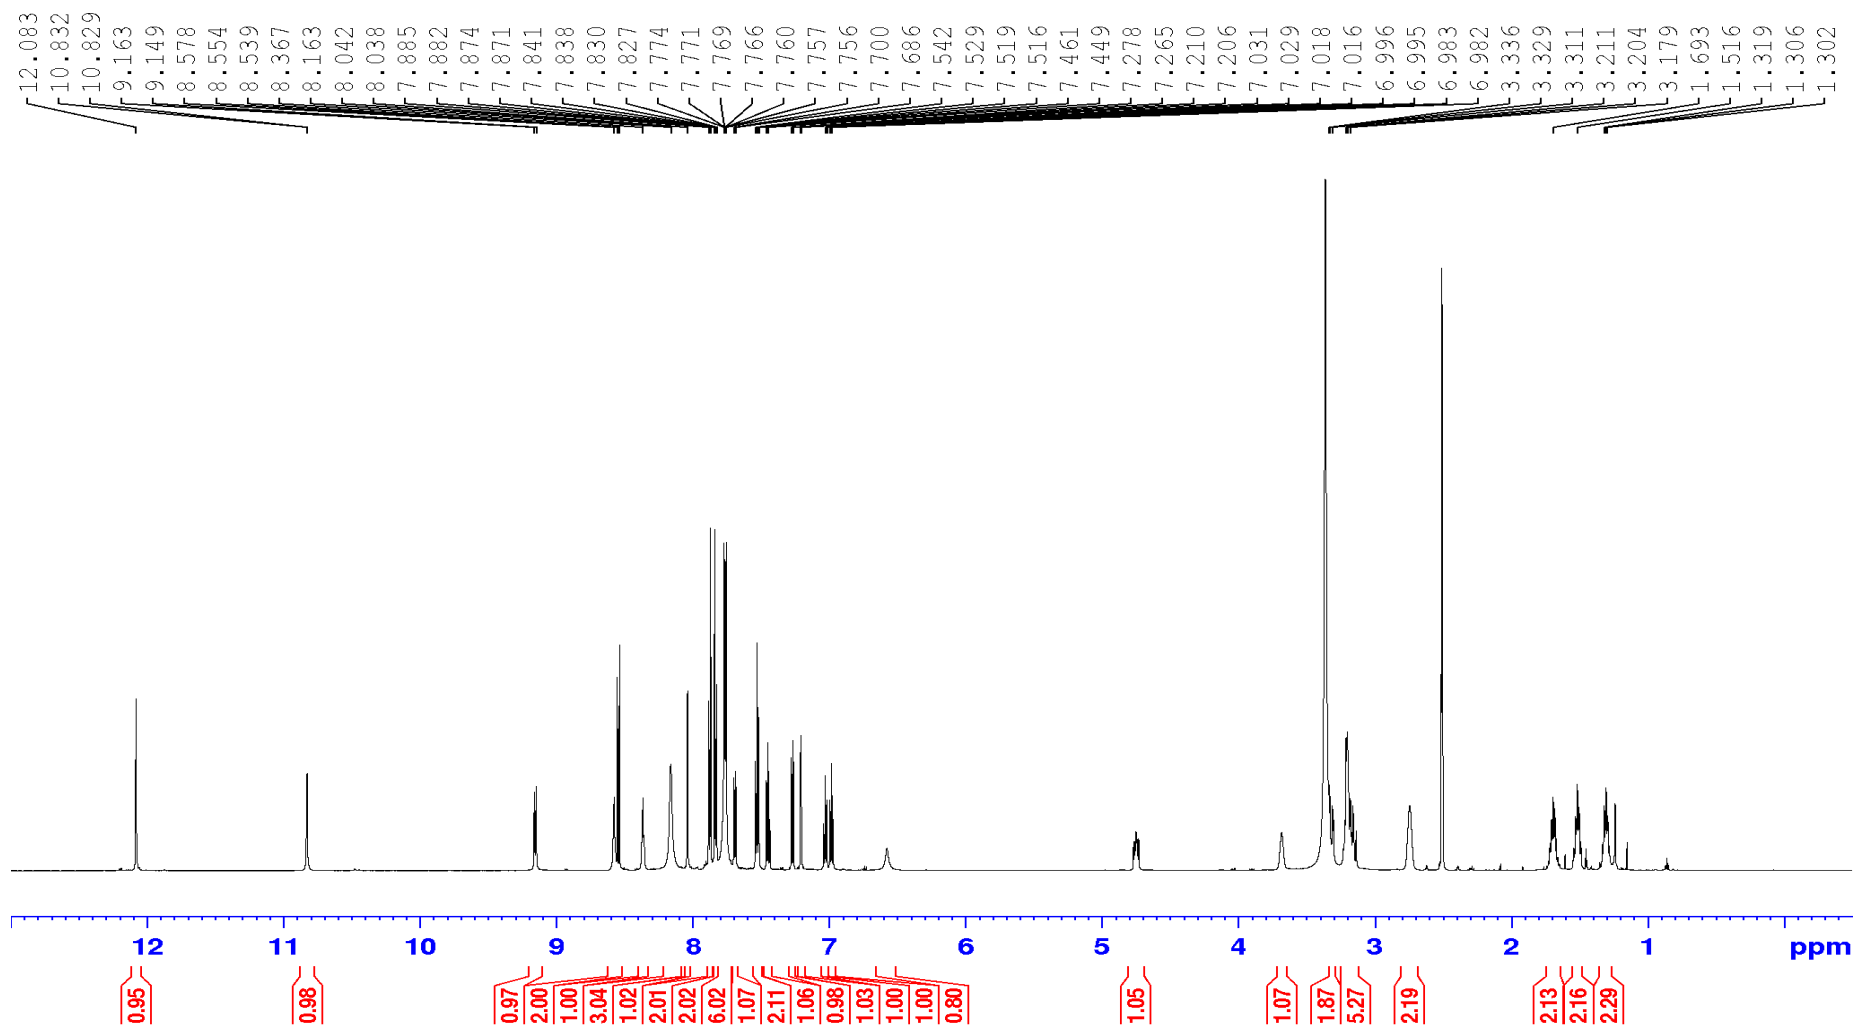

$^{13}\text{C}$  NMR of *N*-(4-bromo-2-(((*S*)-1-((2-((*S*)-2,6-diaminohexanamido)ethyl)amino)-3-(1*H*-indol-3-yl)-1-oxopropan-2-yl)carbamoyl)phenyl)-[1,1'-biphenyl]-4-carboxamide (**17**)

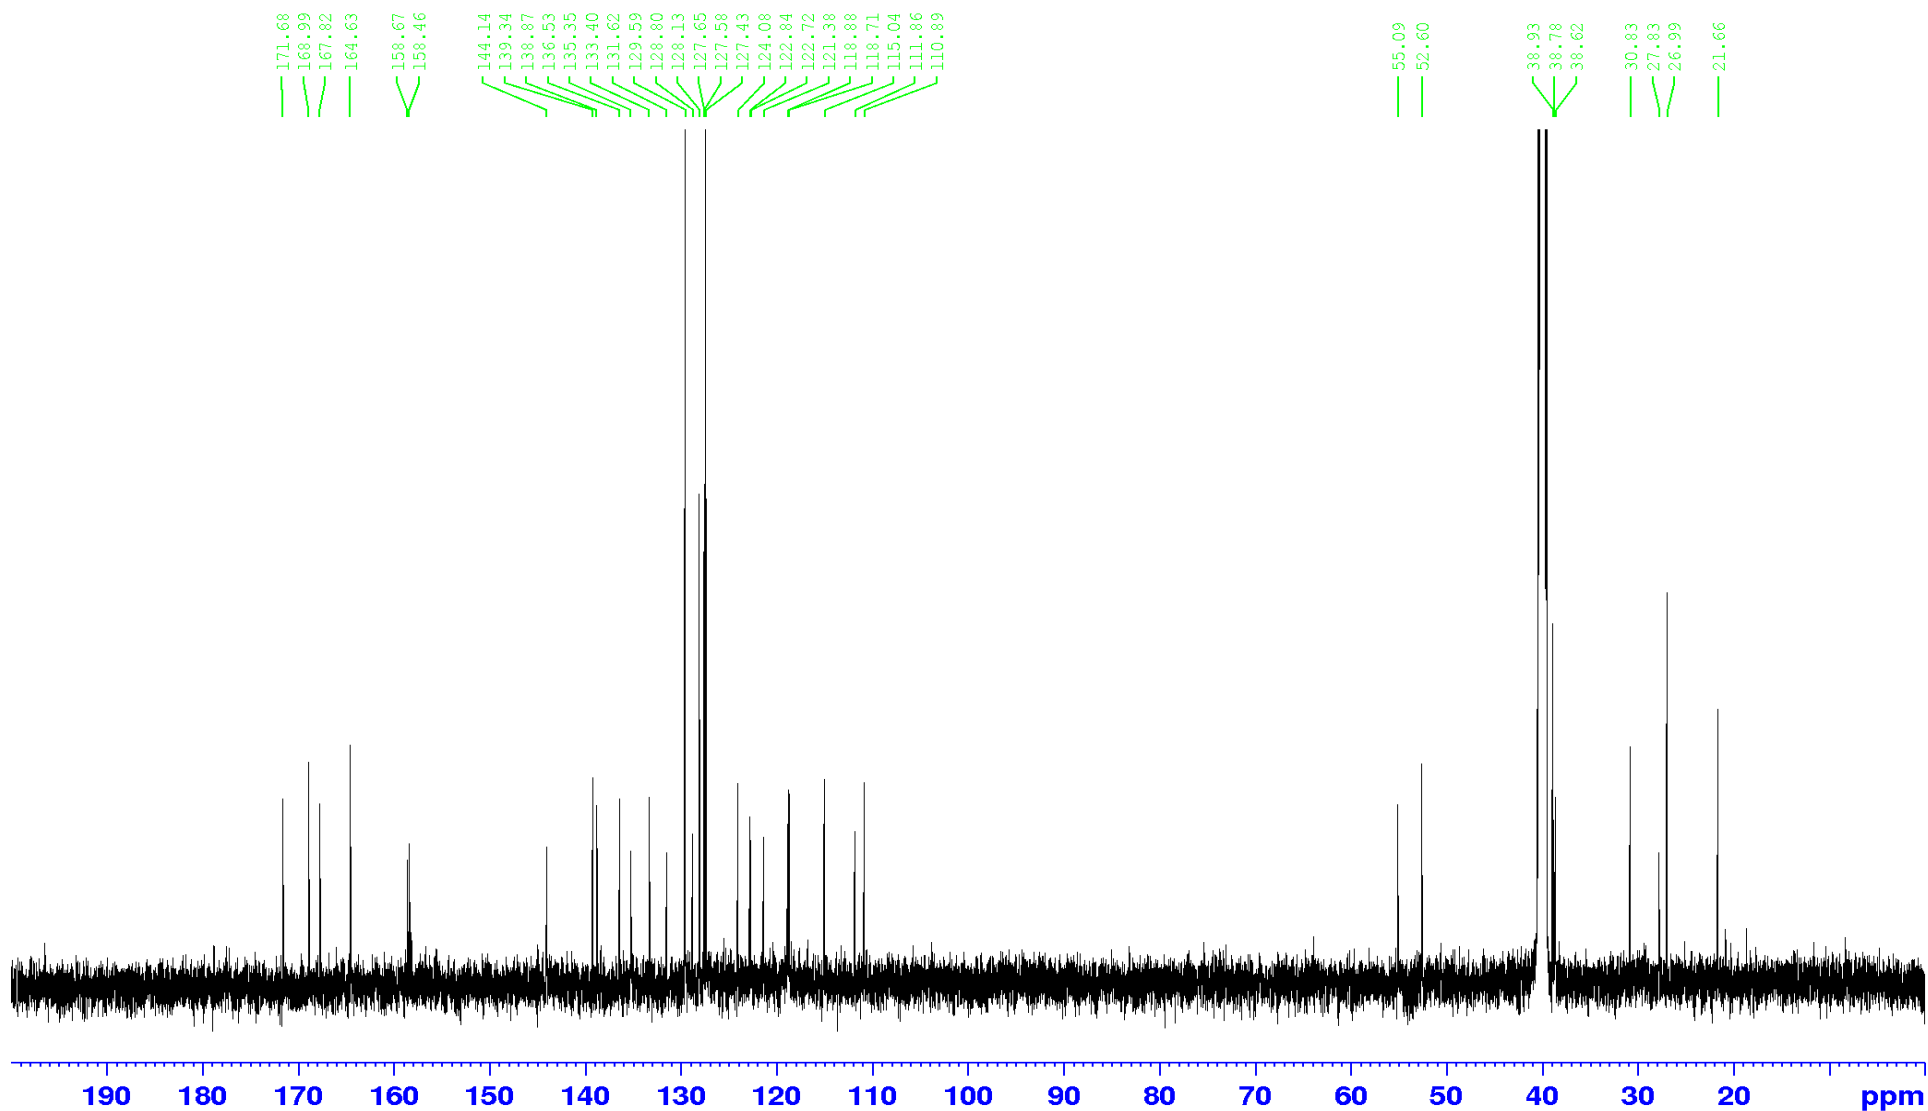

Supplement: s1 [file s1]
